# Supplementary material for: Design, Synthesis and In Vitro Experimental Validation of Novel TRPV4 Antagonists Inspired by Labdane Diterpenes
Source: PubMed Central journal article supplement (PMC7594054; doi:10.3390/md18100519), 2020-10-18

## Supplementary Material for:

# Design, Synthesis and In Vitro Experimental Validation of Novel TRPV4 Antagonists Inspired by Labdane Diterpenes

Sarah Mazzotta <sup>1,2,†</sup>, Gabriele Carullo <sup>1,3,†</sup>, Aniello Schiano Moriello <sup>4,5</sup>, Pietro Amodeo <sup>6</sup>, Vincenzo Di Marzo <sup>4,7</sup>, Margarita Vega-Holm <sup>2</sup>, Rosa Maria Vitale <sup>ψ,\*</sup>, Francesca Aiello <sup>1,\*</sup>, Antonella Brizzi <sup>3,‡</sup> and Luciano De Petrocellis <sup>4,‡</sup>

<sup>1</sup> Department of Pharmacy, Health and Nutritional Sciences, DoE 2018–2022, University of Calabria, Edificio Polifunzionale, 87036 Rende (CS), Italy; sarmaz1@alum.us.es (S.M.); gabriele.carullo@unisi.it (G.C.)

<sup>2</sup> Department of Organic and Medicinal Chemistry, Faculty of Pharmacy, University of Seville, Profesor García González 2, 41071 Seville, Spain; mvegaholm@us.es

<sup>3</sup> Department of Biotechnology, Chemistry and Pharmacy, DoE 2018–2022, University of Siena, Via Aldo Moro 2, 53100 Siena, Italy; brizzi3@unisi.it

<sup>4</sup> Endocannabinoid Research Group (ERG), Institute of Biomolecular Chemistry, National Research Council (ICB-CNR), Via Campi Flegrei 34, 80078 Pozzuoli (NA), Italy; aniello.schianomoriello@icb.cnr.it (A.S.M.); vincenzo.dimarzo@criucpq.ulaval.ca (V.D.M.); luciano.depetrocellis@icb.cnr.it (L.D.P.)

<sup>5</sup> Epitech Group SpA, Saccolongo, Padova, Italy

<sup>6</sup> Institute of Biomolecular Chemistry, National Research Council (ICB-CNR), Via Campi Flegrei 34, 80078 Pozzuoli, (NA), Italy; pamodeo@icb.cnr.it

<sup>7</sup> Canada Excellence Research Chair on the Microbiome-Endocannabinoidome Axis in Metabolic Health (CERC-MEND)-Université Laval, Quebec, QC, Canada

\* Correspondence: rmvitale@icb.cnr.it (R.M.V.); francesca.aiello@unical.it (F.A.)

† These authors contributed equally.

‡ Antonella Brizzi and Luciano De Petrocellis are joint senior authors.

## Contents

|                                                                                                        |    |
|--------------------------------------------------------------------------------------------------------|----|
| Table S1. Results of TRPV1 assay of compounds 1-16, 18-20, 22-25.....                                  | S3 |
| Synthesis, yield, melting points of compounds <b>20</b> and <b>21</b> . .....                          | S3 |
| Representations of the $^1\text{H}$ -NMR and $^{13}\text{C}$ -NMR spectra of all final compounds. .... | S5 |

**Table S1.** Results of TRPV1 assay of compounds 1-16, 18-20, 22-25.<sup>a</sup>

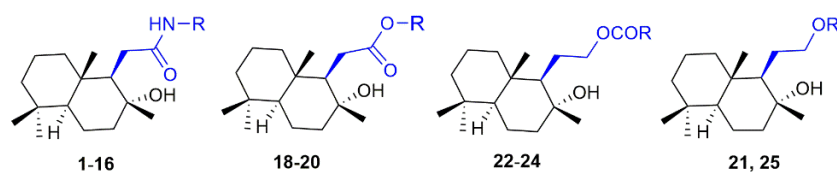

| Cpd. | R | Efficacy <sup>b</sup><br>% | Potency<br>EC <sub>50</sub> (μM) | IC <sub>50</sub> (μM) <sup>c</sup><br>inh TRPV1 | Cpd.             | R  | Efficacy <sup>b</sup><br>% | Potency<br>EC <sub>50</sub><br>(μM) | IC <sub>50</sub> (μM) <sup>c</sup><br>inh TRPV1 |
|------|---|----------------------------|----------------------------------|-------------------------------------------------|------------------|----|----------------------------|-------------------------------------|-------------------------------------------------|
| 1    |   | 33.6 ± 0.8                 | >10                              | > 100                                           | 14               |    | 25.2 ± 2.0                 | > 10                                | > 100                                           |
| 2    |   | < 10                       | NA <sup>d</sup>                  | > 100                                           | 15               |    | < 10                       | NA                                  | > 100                                           |
| 3    |   | 32.0 ± 1.2                 | 4.7 ± 0.4                        | > 100                                           | 16               |    | < 10                       | NA                                  | > 100                                           |
| 4    |   | 36.8 ± 0.2                 | > 10                             | > 10                                            | 18               |    | < 10                       | NA                                  | >10                                             |
| 5    |   | < 10                       | NA                               | > 100                                           | 19               |    | 17.5 ± 2.7                 | >10                                 | > 100                                           |
| 6    |   | 16.9 ± 0.3                 | > 10                             | > 100                                           | 20               | Me | < 10                       | NA                                  | > 100                                           |
| 7    |   | 24.5 ± 0.2                 | 9.9 ± 0.1                        | >50                                             | 21               | H  | < 10                       | NA                                  | > 100                                           |
| 8    |   | 19.7 ± 1.1                 | > 10                             | > 100                                           | 22               |    | <10                        | NA                                  | >100                                            |
| 9    |   | < 10                       | NA                               | > 100                                           | 23               |    | < 10                       | NA                                  | > 100                                           |
| 10   |   | < 10                       | NA                               | >10                                             | 24               |    | < 10                       | NA                                  | > 100                                           |
| 11   |   | < 10                       | NA                               | > 100                                           | 25               |    | < 10                       | >10                                 | > 100                                           |
| 12   |   | < 10                       | NA                               | > 100                                           | Scd <sup>e</sup> | -  | 12.6 ± 0.5                 | > 10                                | > 100                                           |
| 13   |   | 20.8 ± 1.6                 | > 10                             | >50                                             |                  |    |                            |                                     |                                                 |

<sup>a</sup> Data are means ± SEM of at least N = 3 determinations. <sup>b</sup> As percent of the effect of ionomycin (4 μM). Inh = inhibitory activity. <sup>c</sup> Determined against the effect of Capsaicin (100 nM) after a 5 min pre-incubation with each compound. <sup>d</sup>NA = not active, if the efficacy is lower than 10% the potency is not calculated, <sup>e</sup> Scd = (+)-Sclareolide. Capsaicin efficacy 78.6 ± 0.6 EC<sub>50</sub> 5.3 ± 0.4 nM [1]

[1] Del Prete D, Caprioglio D, Appendino G, Minassi A, Schiano-Moriello A, Di Marzo V, De Petrocellis L. Discovery of non-electrophilic capsaicinoid-type TRPA1 ligands. *Bioorg Med Chem Lett.* 2015 Mar 1;25(5):1009-11. doi: 10.1016/j.bmcl.2015.01.039. Epub 2015 Jan 28. PMID: 25666822.

### Synthesis of methyl ester derivative (20).

A well stirred methanolic solution of (+)-sclareolide (100 mg, 3 mL) was heated at 45 °C for 72 h. After that, the mixture was evaporated to dryness and the pure compound obtained after flash column chromatography using a gradient of PE/EtOAc. The compound was isolated as a white solid. Mp 72-73 °C (G). NMR data are in agreement with those reported. [1] Anal. Calcd. for C<sub>17</sub>H<sub>30</sub>O<sub>3</sub>: C, 72.30; H, 10.71. Found: C, 72.56; H, 10.75.

[1] Carmna, R.M. and Deeth, H.C. Diterpenoids XXVII. The Synthesis of  $\alpha$ -Onoceradiene from Abienol. *Aust. J. Chem.* **1971**, *24*, 1099-1102.

**Synthesis of (1R,2R,4aS,8aS)-1-(2-hydroxyethyl)-2,5,5,8a-tetramethyldecahydronaphthalen-2-ol (homodrimanyl diol) (21).** (+)-Sclareolide (300 mg, 1.2 mmol, 1.0 eq.) was dissolved in dry THF (50 mL) under argon and cooled to 0 °C. Then, LiAlH<sub>4</sub> (455.4 mg, 12.0 mmol, 10.0 eq.) was added to the solution. The reaction mixture was stirred at rt for 6 h, then quenched with EtOAc (30 mL) and evaporated to dryness. The residue was dissolved in CH<sub>2</sub>Cl<sub>2</sub> (50 mL) and the organic phase washed twice with 1 N HCl (30 mL), with saturated aqueous NaHCO<sub>3</sub> (30 mL), and brine (30 mL). The organic phase was finally dried over anhydrous Na<sub>2</sub>SO<sub>4</sub>, filtered and concentrated under vacuum to give homodrimanyl diol **21** as a white crystalline solid in quantitative yield. Mp 129.5-130.5 °C. <sup>1</sup>H-NMR data are in agreement with those reported. [2] Anal. Calcd. for C<sub>17</sub>H<sub>30</sub>O<sub>3</sub>: C, 72.30; H, 10.71. Found: C, 72.56; H, 10.75.

[2] Li, D.; Zhang, S.; Song, Z.; Wang, G.; Li, S. Bioactivity-Guided Mixed Synthesis Accelerate the Serendipity in Lead Optimization: Discovery of Fungicidal Homodrimanyl Amides. *Eur. J. Med. Chem.* **2017**, *136* (31401777), 114–121. <https://doi.org/10.1016/j.ejmech.2017.04.073>.

Current Data Parameters  
 NAME SM30 CDC13  
 EXPNO 1  
 PROCNO 1

F2 - Acquisition Parameters  
 Date\_ 20190626  
 Time\_ 9.30  
 INSTRUM spect  
 PROBRD 5 mm 1H 28284/  
 PULPROG zgpg30  
 TD 65536  
 SOLVENT CDCl3  
 NS 64  
 DS 0  
 SMH 4194.631 Hz  
 FIDRES 0.064005 Hz  
 AQ 7.8119411 sec  
 RG 16  
 DW 119.200 usec  
 DE 6.00 usec  
 TE 300.0 K  
 D1 2.00000000 sec

===== CHANNEL f1 =====  
 NUC1 1H  
 P1 6.80 usec  
 PL1 -3.00 dB  
 SFO1 300.1319508 MHz

F2 - Processing parameters  
 SI 32768  
 SF 300.1300174 MHz  
 MDW no  
 SSB 0  
 LB 0.00 Hz  
 GB 0  
 PC 0.50

2249.674  
 2248.221  
 2242.998  
 2235.541  
 2230.448  
 2176.911  
 2171.736  
 2167.575  
 2167.186  
 2164.313  
 2155.988  
 2152.222  
 2108.088  
 2104.875  
 2104.479  
 2100.652  
 2093.426

8.2 8.1 8.0 7.9 7.8 7.7 7.6 7.5 7.4 7.3 7.2 7.1 7.0 6.9 6.8 6.7 6.6 6.5 6.4 6.3 ppm

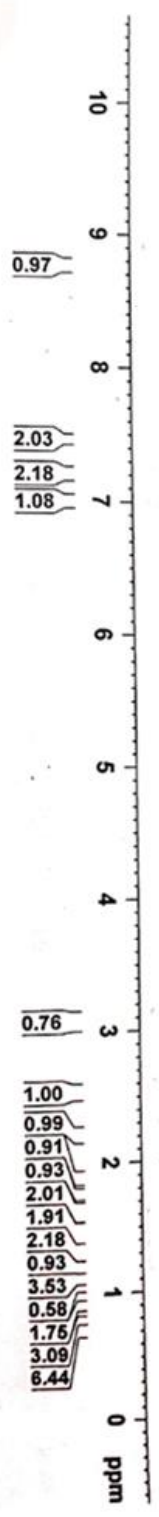

Compd. 1

Compd. 1

Current Data Parameters  
 NAME 13C SM10  
 EXENO 2  
 PROCNO 2

F2 - Acquisition Parameters  
 Date 20130428  
 Time 11:48  
 INSTRUM spect  
 PROBPID 5 mm 1H 2B5847  
 FULPROG zgpg30  
 TD 2999  
 SFO1 65.536  
 SOLVENT CDCl3  
 NS 512  
 DS 8

SMN 17985.611 Hz  
 FIDRES 0.274439 Hz  
 AQ 1.8219508 sec  
 RG 11585.2  
 DW 27.800 usec  
 DE 6.00 usec  
 TE 300.0 K  
 D1 2.50000000 sec  
 d11 0.03000000 sec  
 d12 0.00002000 sec

\*\*\*\*\* CHANNEL f1 \*\*\*\*\*  
 NUCL1 13C  
 P1 7.75 usec  
 PL1 -2.00 dB  
 SFO1 75.4752953 MHz

\*\*\*\*\* CHANNEL f2 \*\*\*\*\*  
 CPDPRG2 waltz16  
 NUCL2 1H  
 PCPD2 80.00 usec  
 PL2 -3.00 dB  
 PL12 17.50 dB  
 PL13 17.50 dB  
 SFO2 300.1312005 MHz

F2 - Processing Parameters  
 SI 32768  
 SF 75.467520 MHz  
 MDW EN  
 SSB 0  
 LB 1.00 Hz  
 GB 0  
 PC 1.40

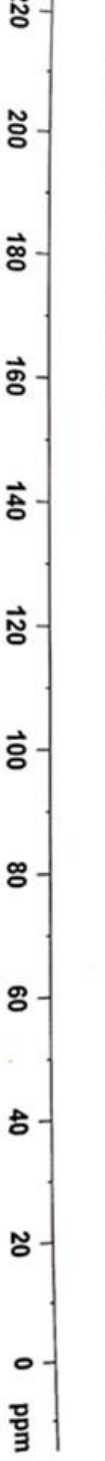

174.04  
 138.37  
 138.37  
 129.01  
 129.01  
 127.81  
 127.74  
 124.80  
 120.70  
 118.61  
 77.51  
 77.08  
 76.66  
 73.66  
 59.27  
 58.24  
 57.87  
 56.70  
 55.17  
 44.88  
 43.76  
 43.41  
 41.70  
 40.25  
 39.43  
 38.52  
 35.85  
 34.88  
 34.11  
 33.69  
 33.17  
 32.47  
 24.76  
 23.25  
 22.19  
 21.76  
 21.07  
 20.52  
 19.70  
 19.14  
 18.43  
 16.23  
 16.08  
 14.16  
 14.58

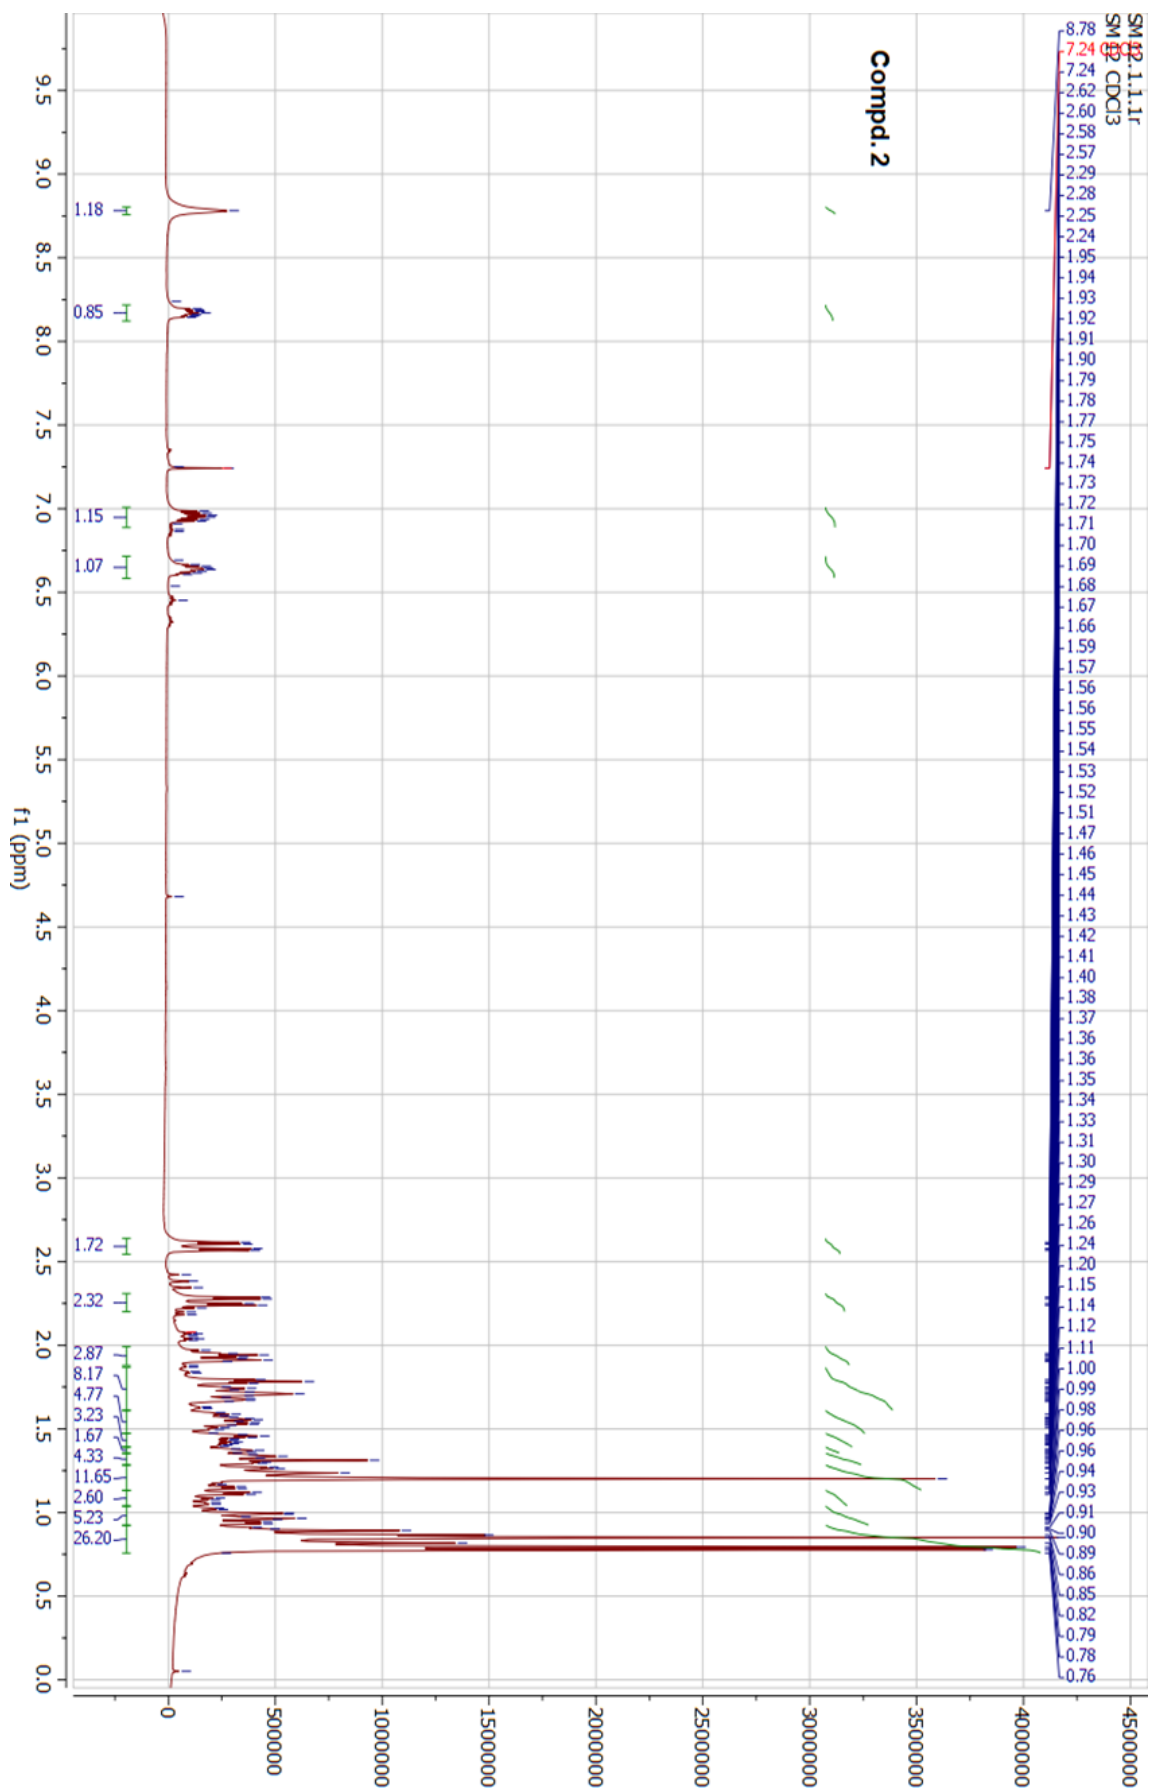

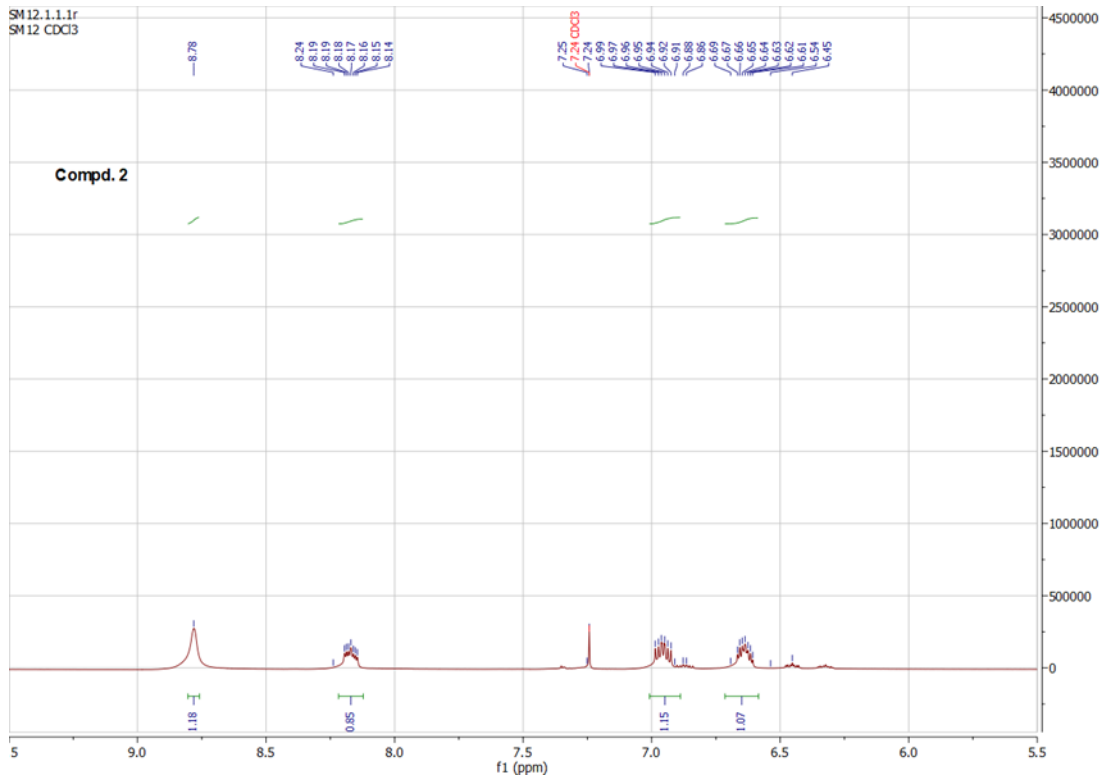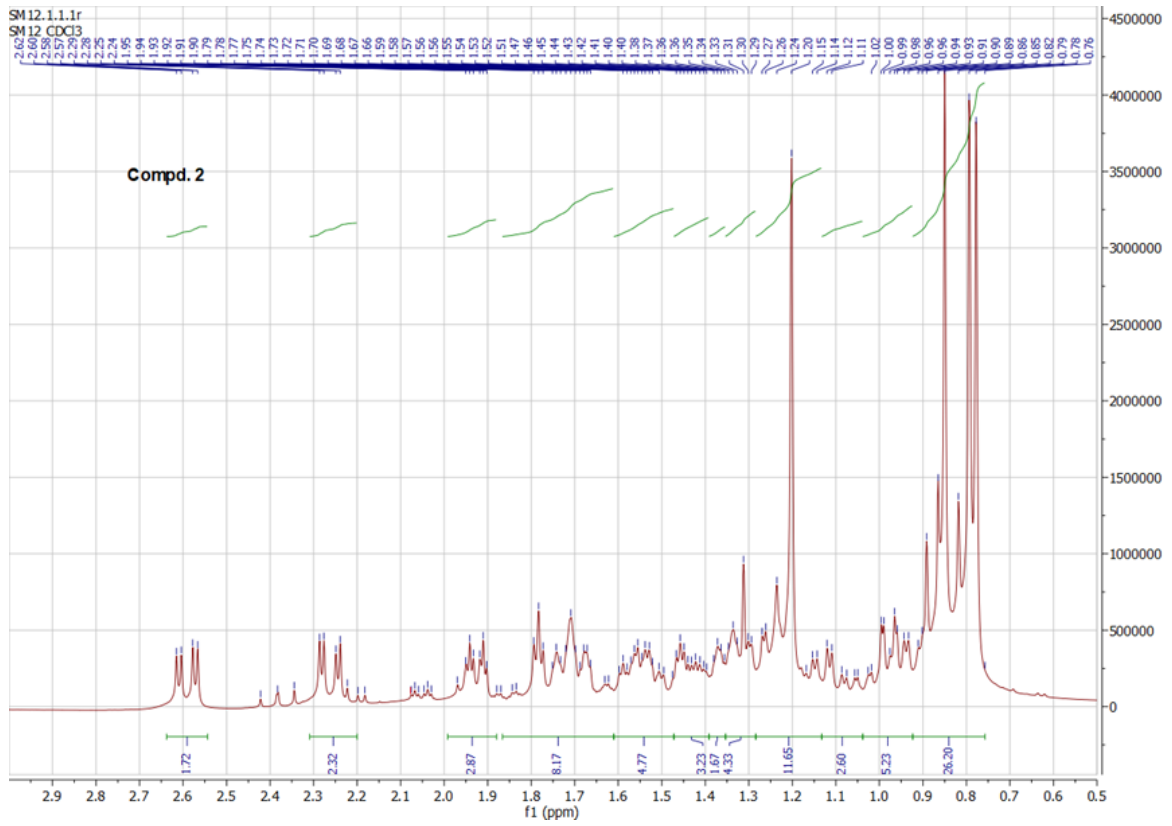



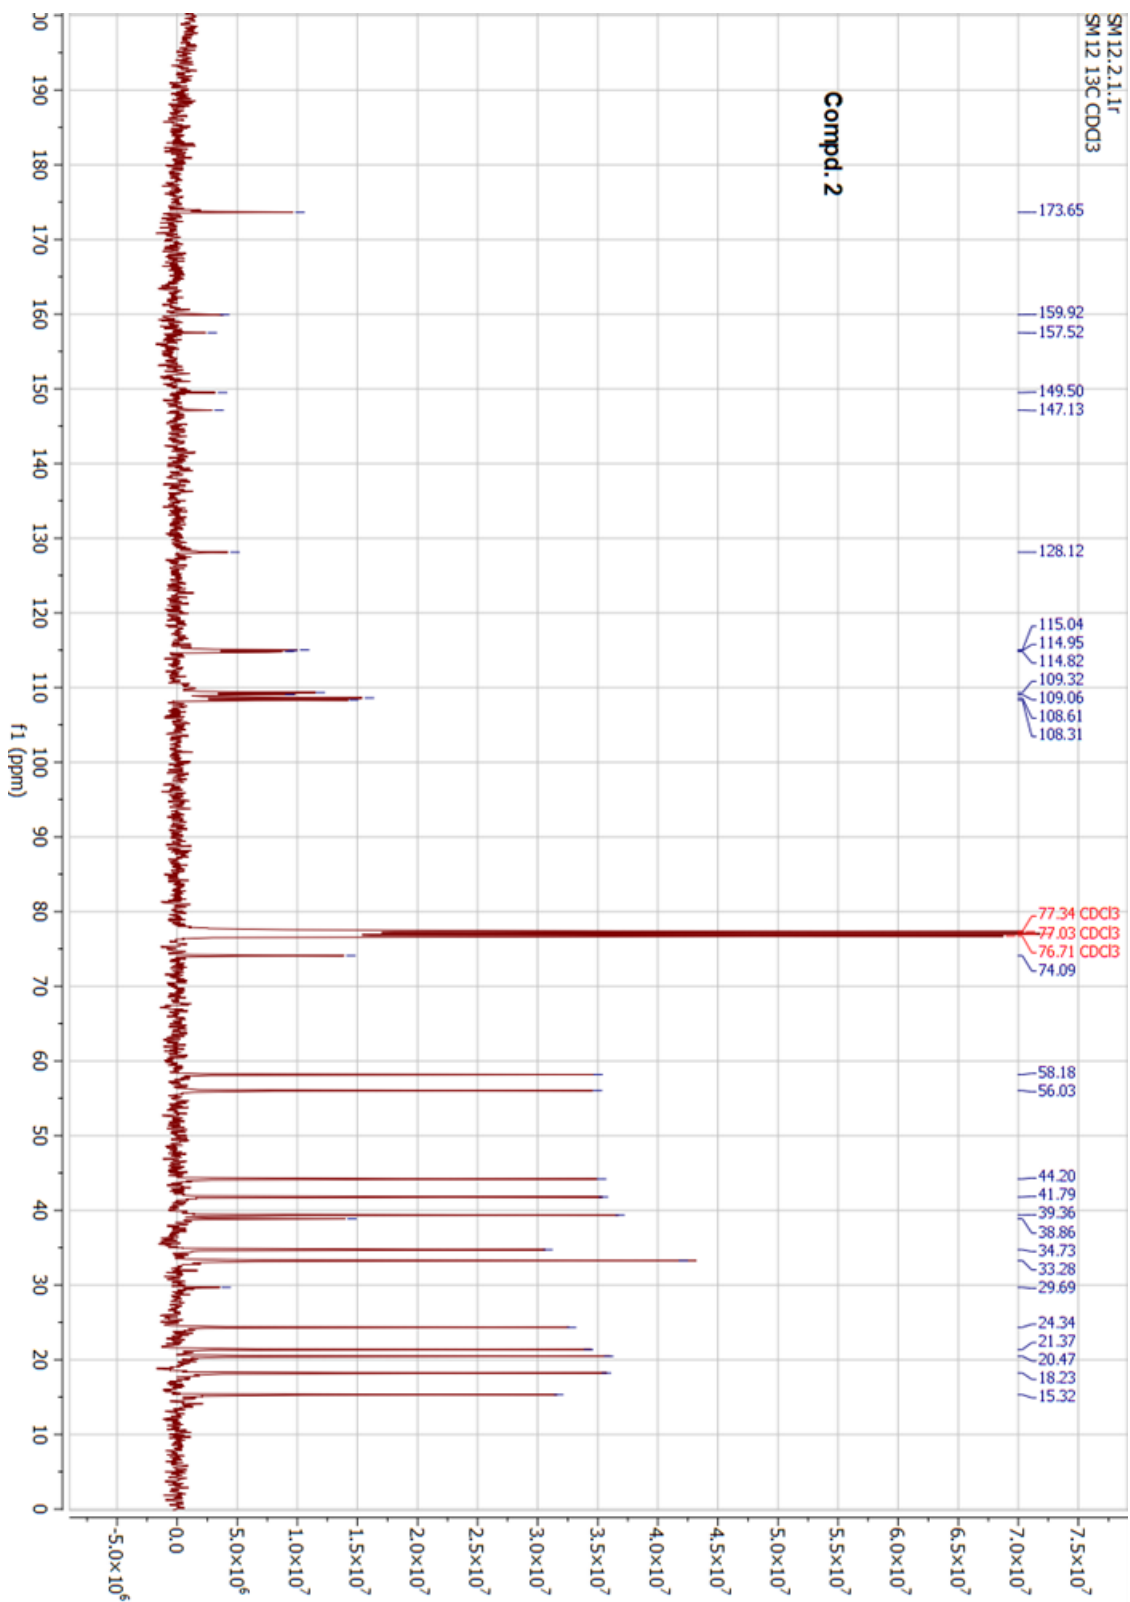

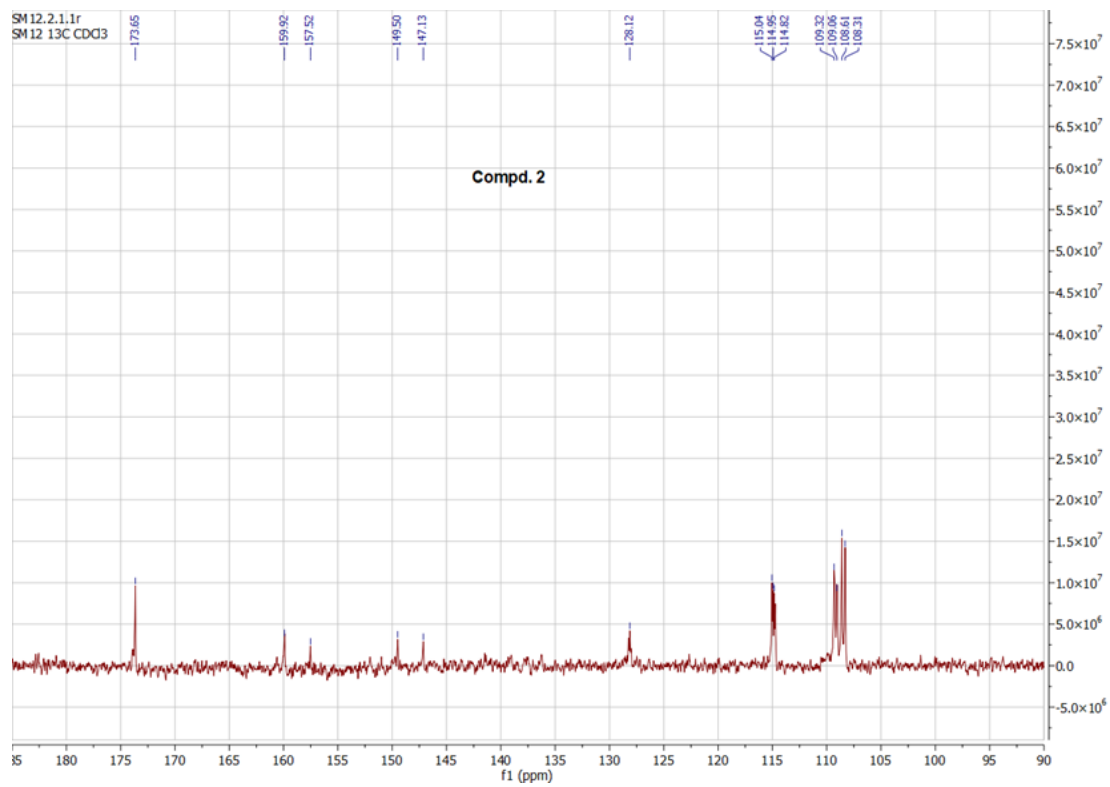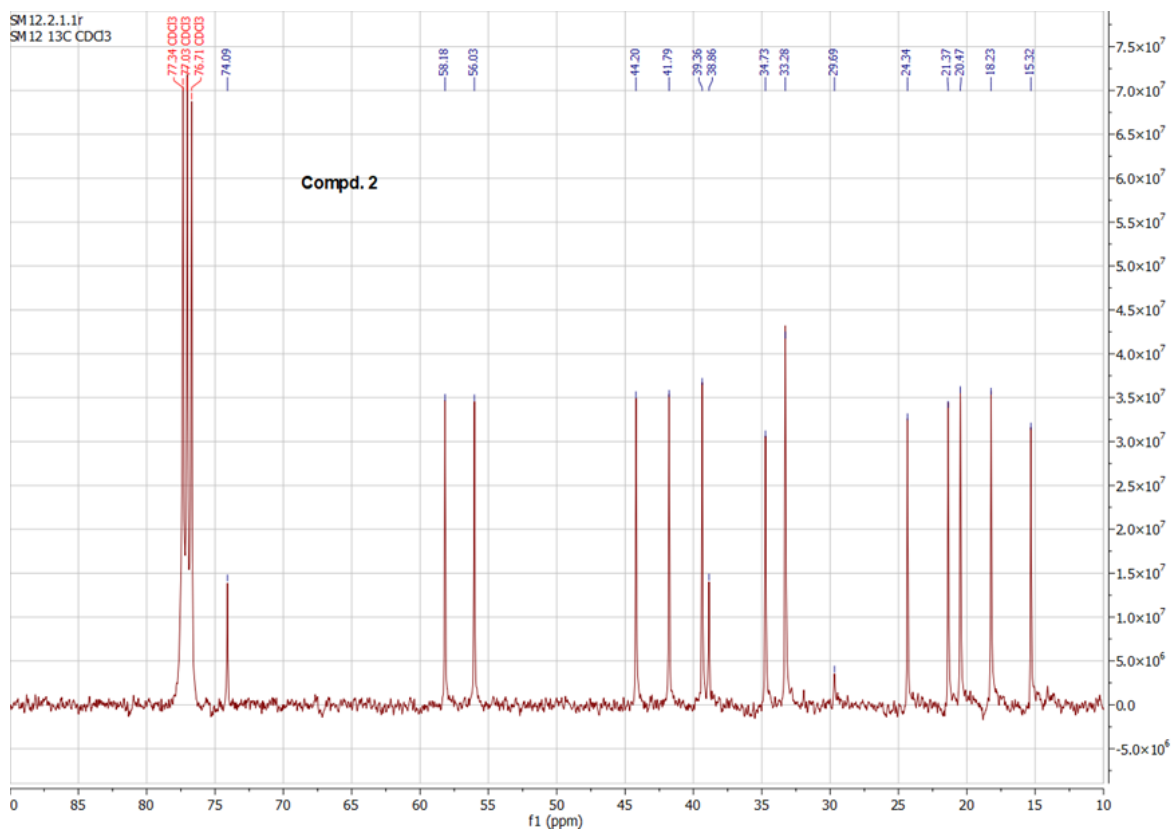

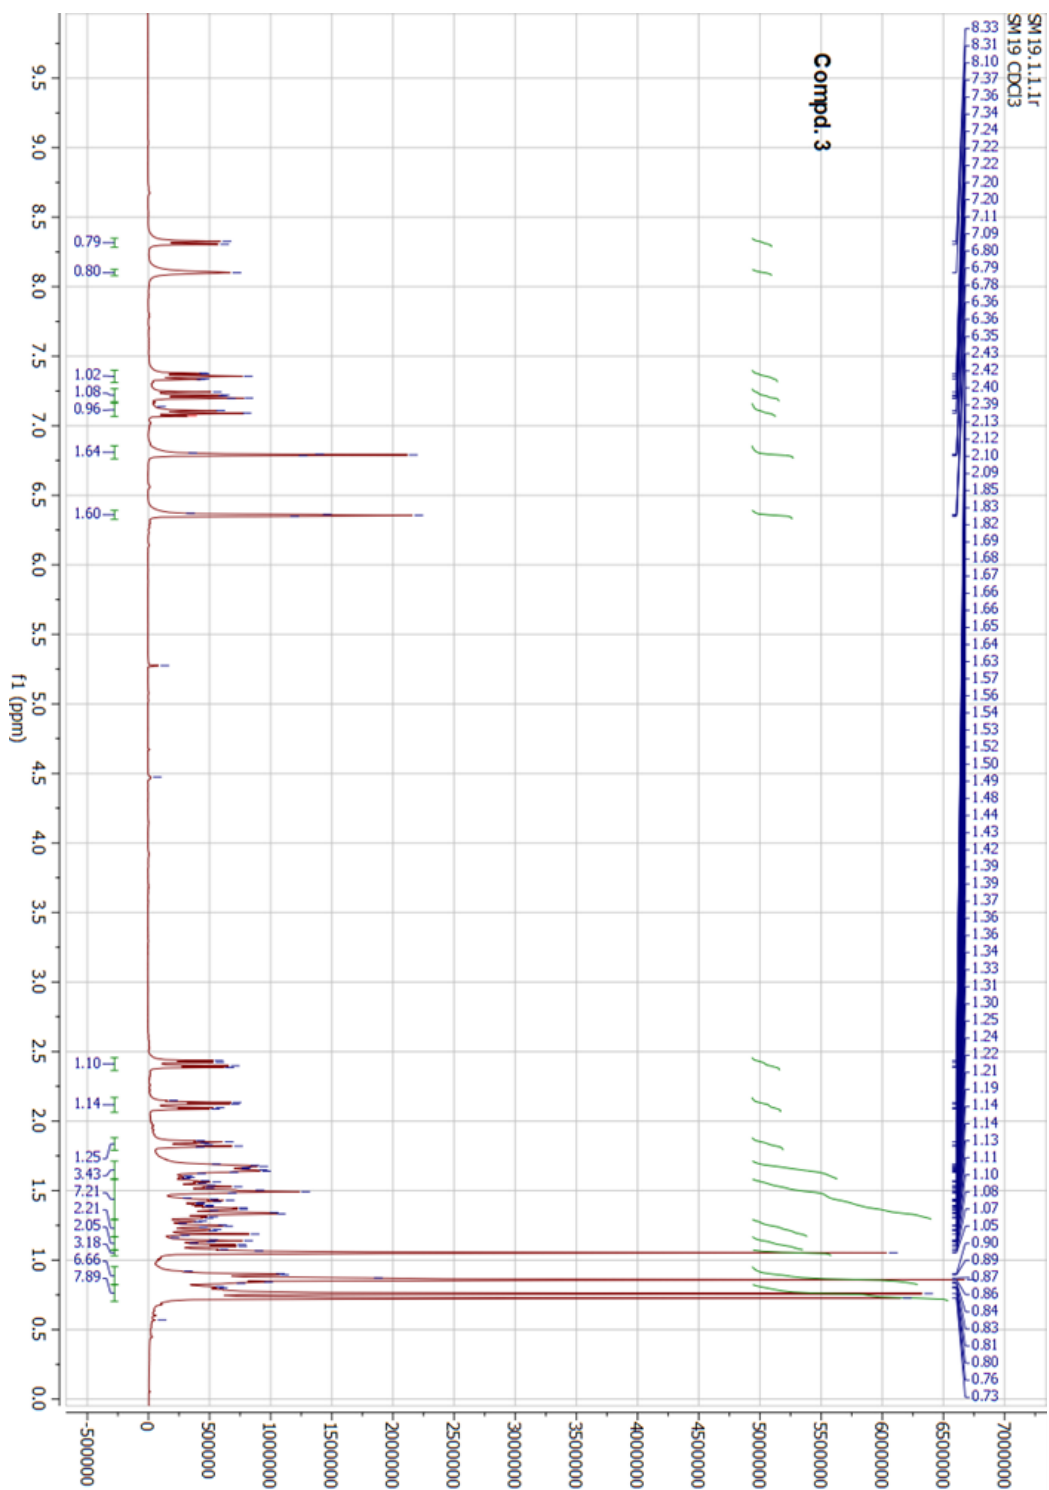



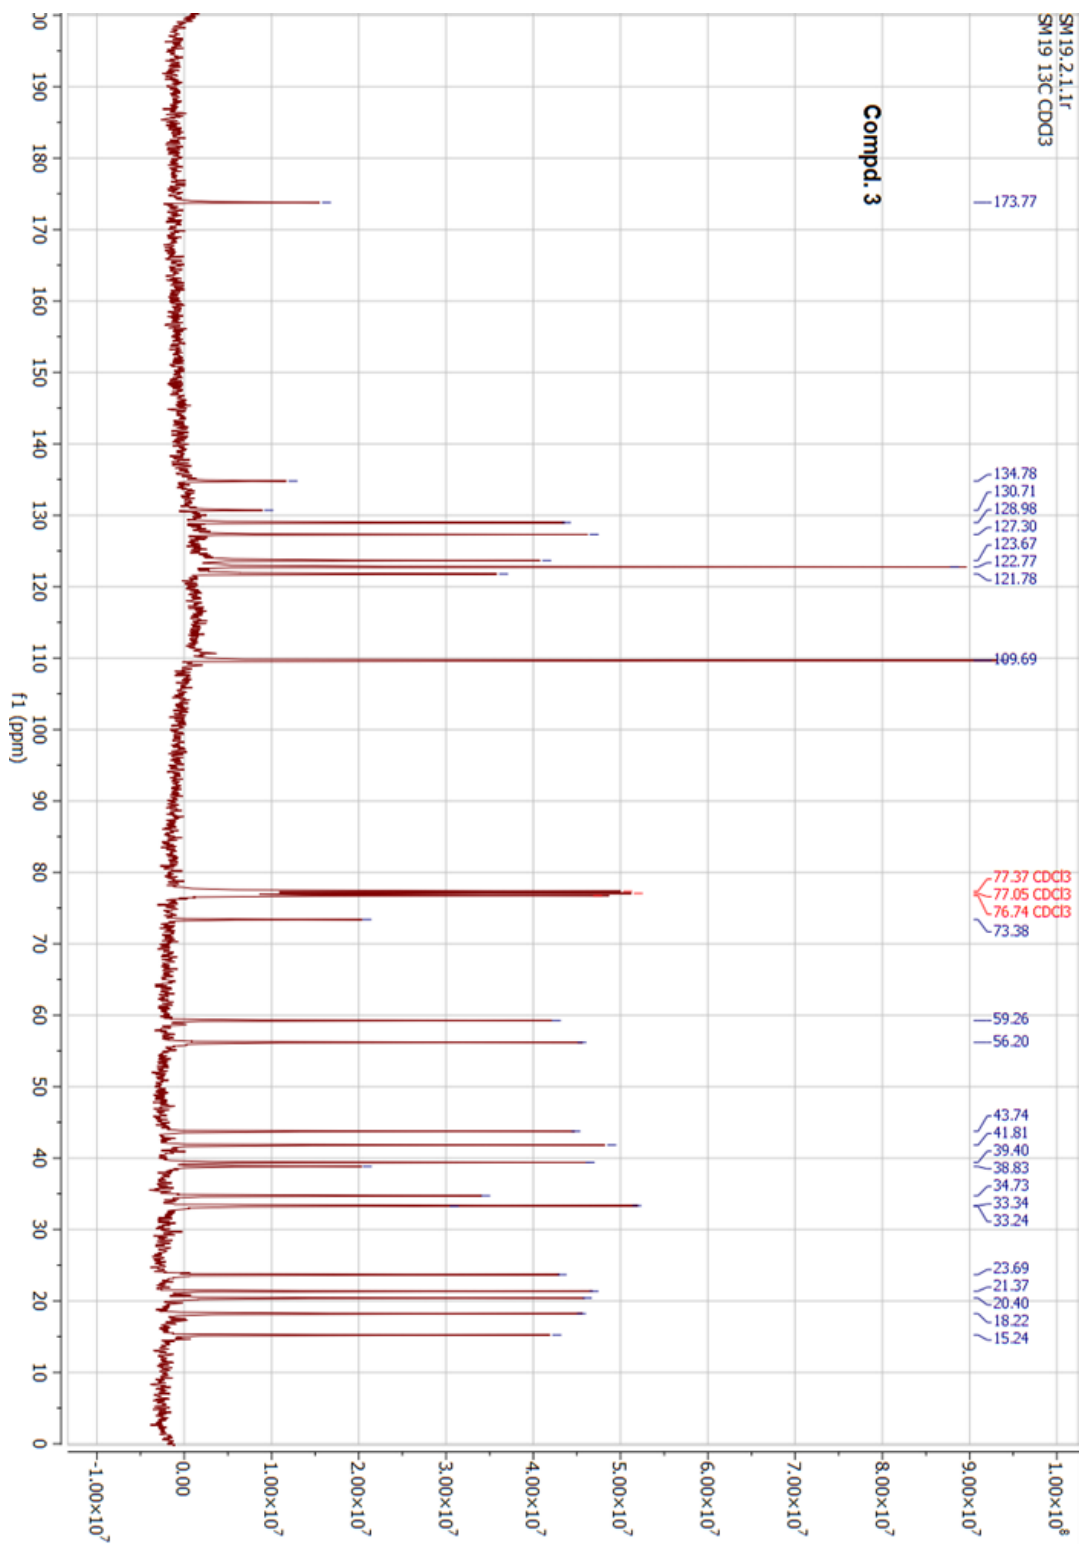

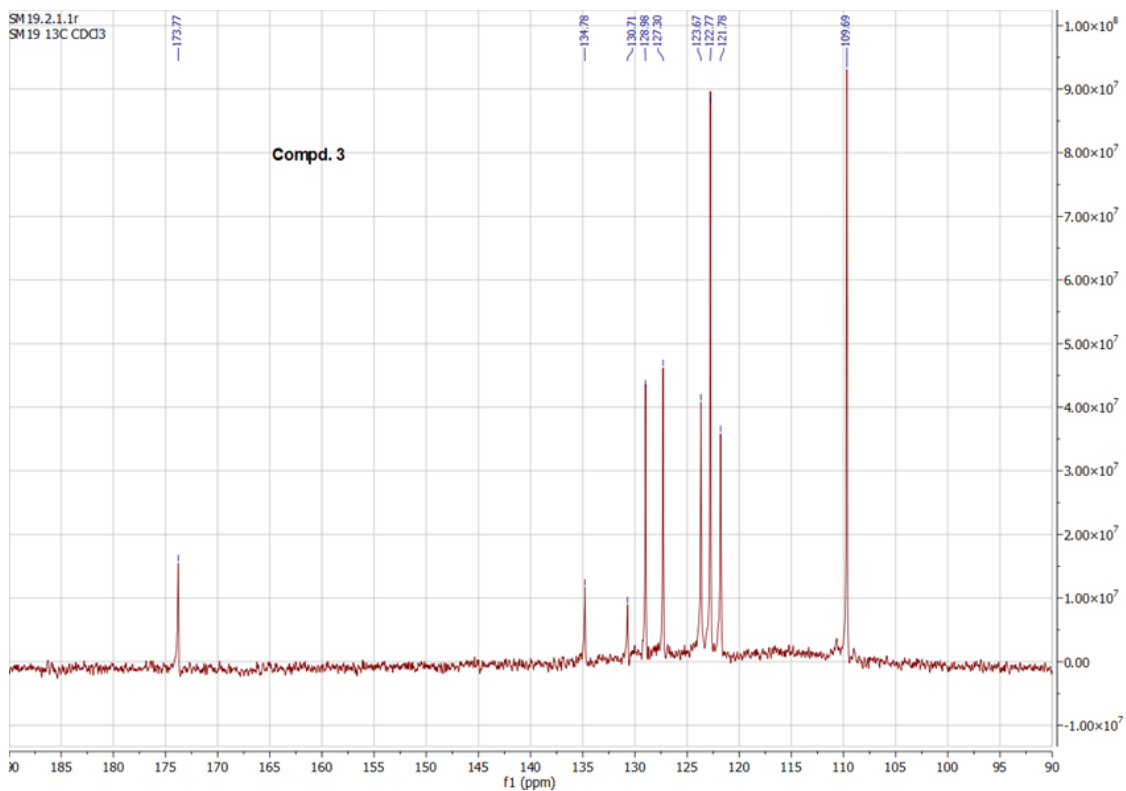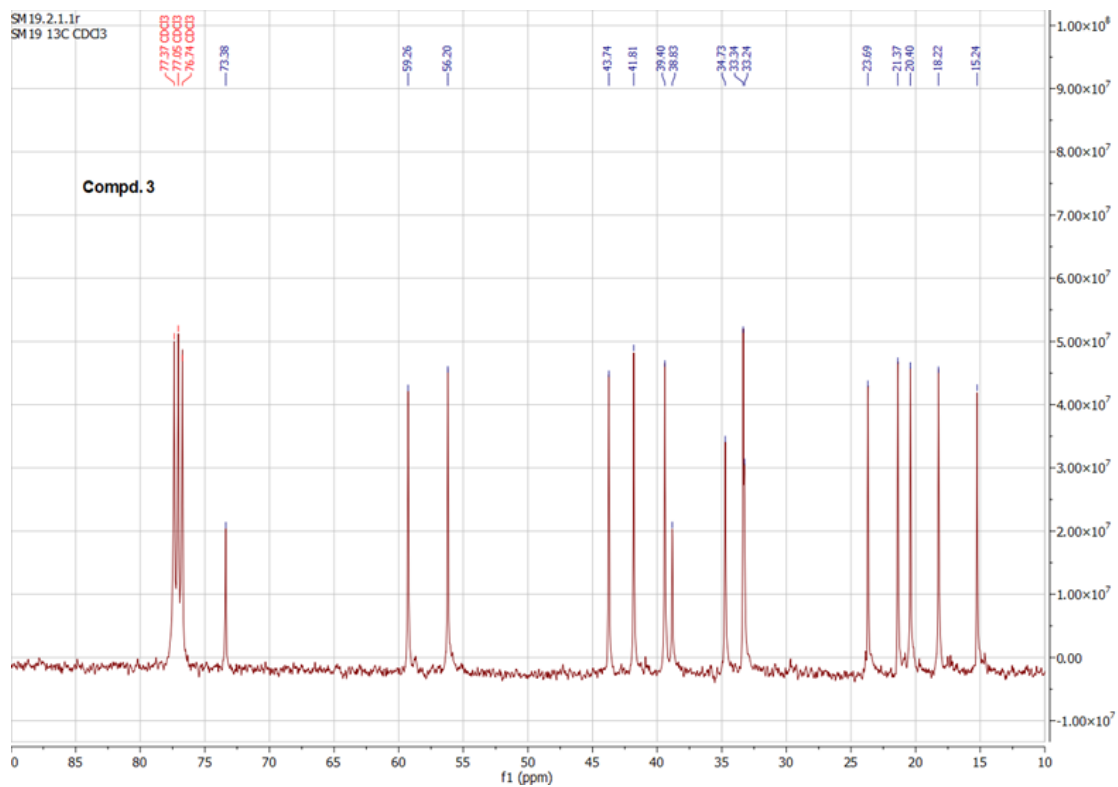

Compd. 4

Current Data Parameters  
NAME: S28 C011  
EXPNO: 1  
PROCNO: 1  
F2 - Acquisition Parameters  
Date\_ : 2019\_08\_17  
Time: 8:47  
INSTRUM: spect  
PROBHD: 5 mm 1H ZG304/  
PULPROG: zgpg30  
SOLVENT: CDCl3  
NS: 64  
DS: 0  
SWH: 4194.431 Hz  
FREQS: 101.625000 MHz  
AQ: 0.044003 sec  
RG: 7.819411 sec  
AQ: 16  
RG: 119.200 us/pt  
SFO1: 300.135000 MHz  
TE: 300.0 K  
D1: 2.00000000 sec  
===== CHANNEL f1 =====  
NUC1: 1H  
P1: 6.80 usec  
PL1: -1.00 dB  
SFO1: 300.135008 MHz  
F2 - Processing parameters  
SI: 32768  
SF: 300.1350174 MHz  
WDW: EM  
SSB: 0  
LB: 0.00 Hz  
GB: 0  
PC: 0.50

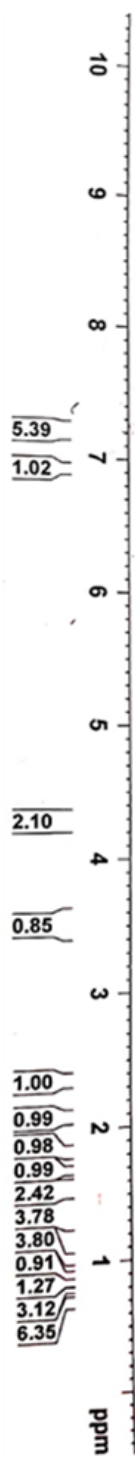

Current Data Parameters  
 NAME 13C SM28  
 EXPRNO 2  
 PROCNO 2

F2 - Acquisition Parameters  
 Date\_ 20190626  
 Time 10.20  
 INSTRUM spect  
 PROBDH 5 mm 1H 28284/  
 PULPROG zgpg  
 TD 65536  
 SOLVENT CDCl3  
 NS 512  
 DS 8  
 SMH 17985.611 Hz  
 FIDRES 0.274439 Hz  
 AQ 1.8219508 sec  
 RG 11585.2  
 DW 27.800 usec  
 DE 6.00 usec  
 TE 300.0 K  
 D1 2.50000000 sec  
 d11 0.03000000 sec  
 d12 0.00002000 sec

\*\*\*\*\* CHANNEL f1 \*\*\*\*\*  
 NUCL1 13C  
 P1 7.75 usec  
 PL1 -3.00 dB  
 SFO1 75.4752953 MHz

\*\*\*\*\* CHANNEL f2 \*\*\*\*\*  
 CPDPRG2 waltz16  
 NUCL2 1H  
 PCPD2 80.00 usec  
 PL2 -3.00 dB  
 PL12 17.50 dB  
 PL13 17.50 dB  
 SFO2 300.1312005 MHz

F2 - Processing parameters  
 SI 32768  
 SF 75.467520 MHz  
 KW EM  
 SSB 0  
 LB 1.00 Hz  
 GB 0  
 PC 1.40

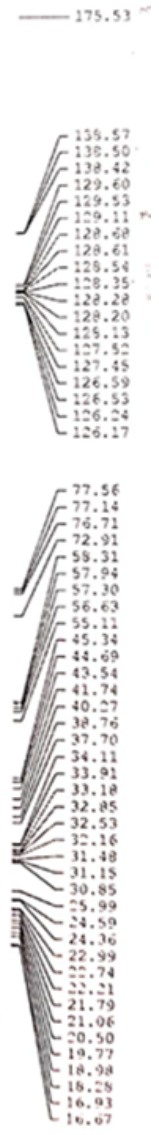



Current Data Parameters  
 NAME: **SM (M)** C0213  
 PROCNO: 1

**Compd. 5**

F2 - Acquisition Parameters  
 Date\_ 20181219  
 Time 9:21  
 INSTRUM spect  
 PROBNM 5 mm 1H zB864/  
 PULPROG zgpg30  
 TO 65536  
 SOLVENT CDCl3  
 NS 16  
 DS 0  
 SWH 4194.63 Hz  
 FIDRES 0.064005 Hz  
 AQ 7.819411 sec  
 RG 35.9  
 DW 119.200 usec  
 DE 6.00 usec  
 TE 300.0 K  
 D1 2.00000000 sec

\*\*\*\*\* CHANNEL f1 \*\*\*\*\*  
 NUC1 1H  
 P1 6.80 usec  
 PL1 -3.00 dB  
 SFO1 300.1319508 MHz

F2 - Processing parameters  
 SI 32768  
 SF 300.129995 MHz  
 WDW po  
 SSB 0  
 LB 0.00 Hz  
 GB 0  
 PC 0.50

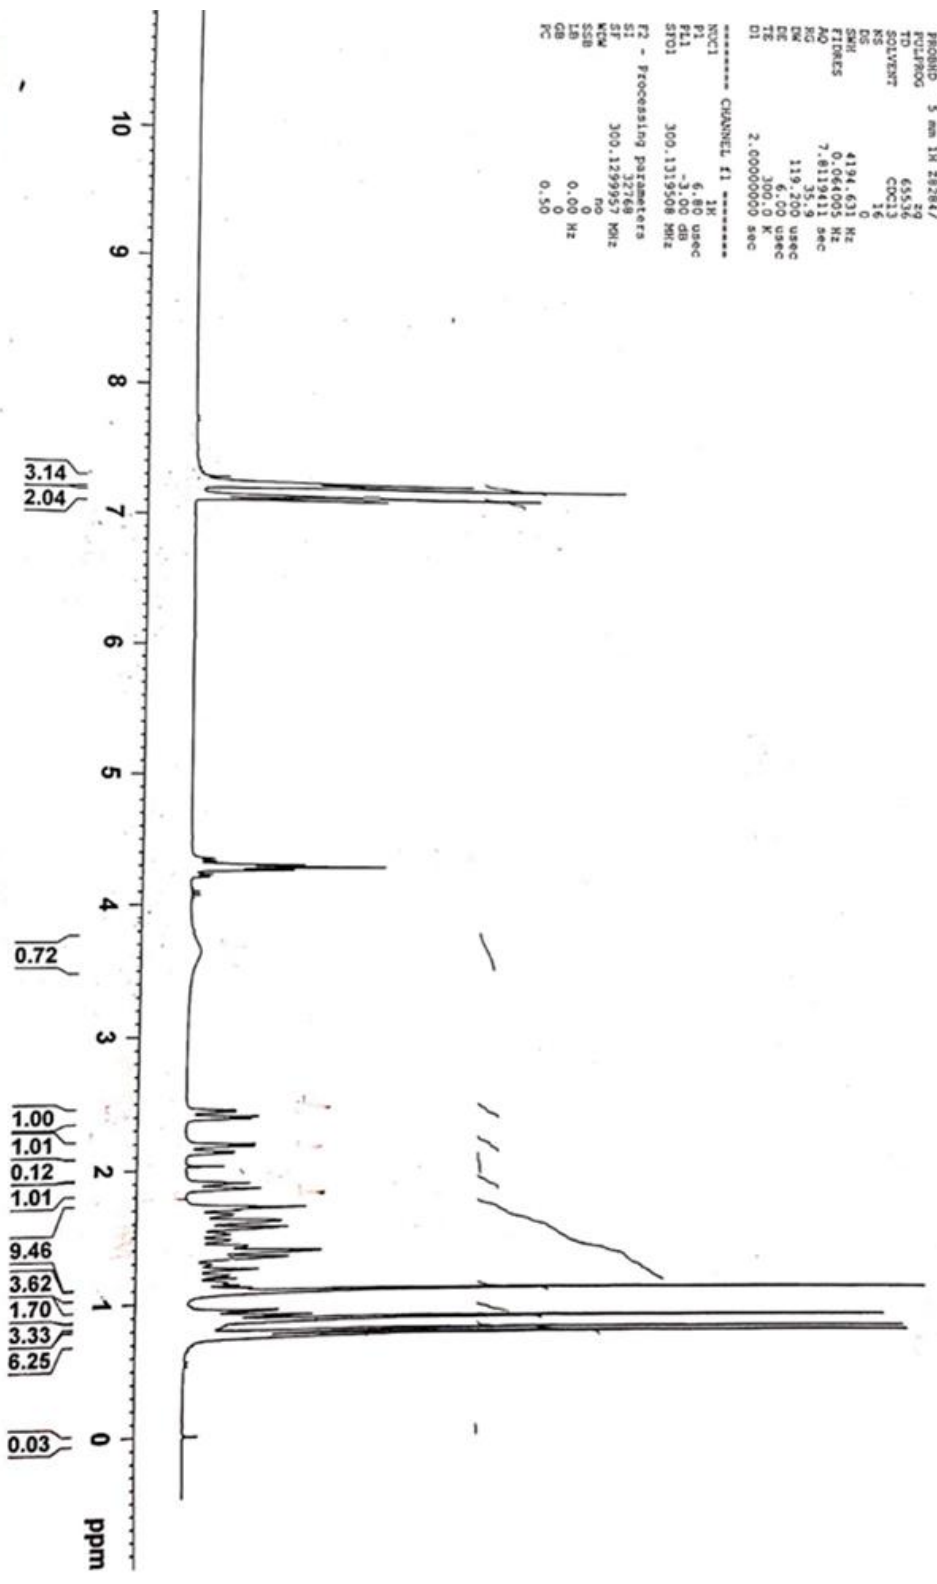

Current Data Parameters  
 NAME 13C SM (44)  
 EXPNO 2  
 PROCNO 2

**Compd. 5**

137.10  
 132.85  
 129.05  
 127.21  
 77.56  
 77.14  
 76.71  
 72.96  
 57.85  
 55.88  
 44.08  
 42.75  
 41.65  
 39.22  
 38.72  
 33.20  
 33.17  
 32.48  
 24.00  
 23.69  
 21.39  
 20.39  
 19.29  
 15.17

F2 - Acquisition Parameters  
 Date\_ 20181219  
 TIME 12:00:00  
 INSTRUM spect  
 PROBRD 5 mm 1H BBI67  
 PULPROG zgpg30  
 TOU 65518  
 SOLVENT CDCl3  
 NS 512  
 DS 8  
 SM 17985.611 Hz  
 FIDRES 0.274429 Hz  
 AQ 1.15852 sec  
 RG 327.5  
 DW 27.600 usec  
 DE 6.00 usec  
 TE 300.2 K  
 D1 2.5000000 sec  
 d11 0.0300000 sec  
 d12 0.0002000 sec

\*\*\*\*\* CHANNEL f1 \*\*\*\*\*  
 NUC1 13C  
 P1 7.75 usec  
 PL1 -3.00 dB  
 SFO1 75.4752953 MHz

\*\*\*\*\* CHANNEL f2 \*\*\*\*\*  
 CTR0RG2 waltz16  
 NUC2 1H  
 PCH2 80.00 usec  
 PL2 -3.00 dB  
 PL12 17.50 dB  
 SFO2 300.1312005 MHz

F2 - Processing Parameters  
 SI 32768  
 SF 75.4673250 MHz  
 KW 0  
 SSB 0  
 LB 0.00 Hz  
 GB 0  
 PC 1.40

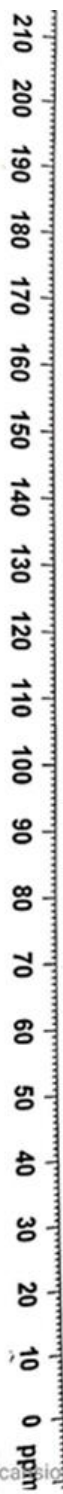

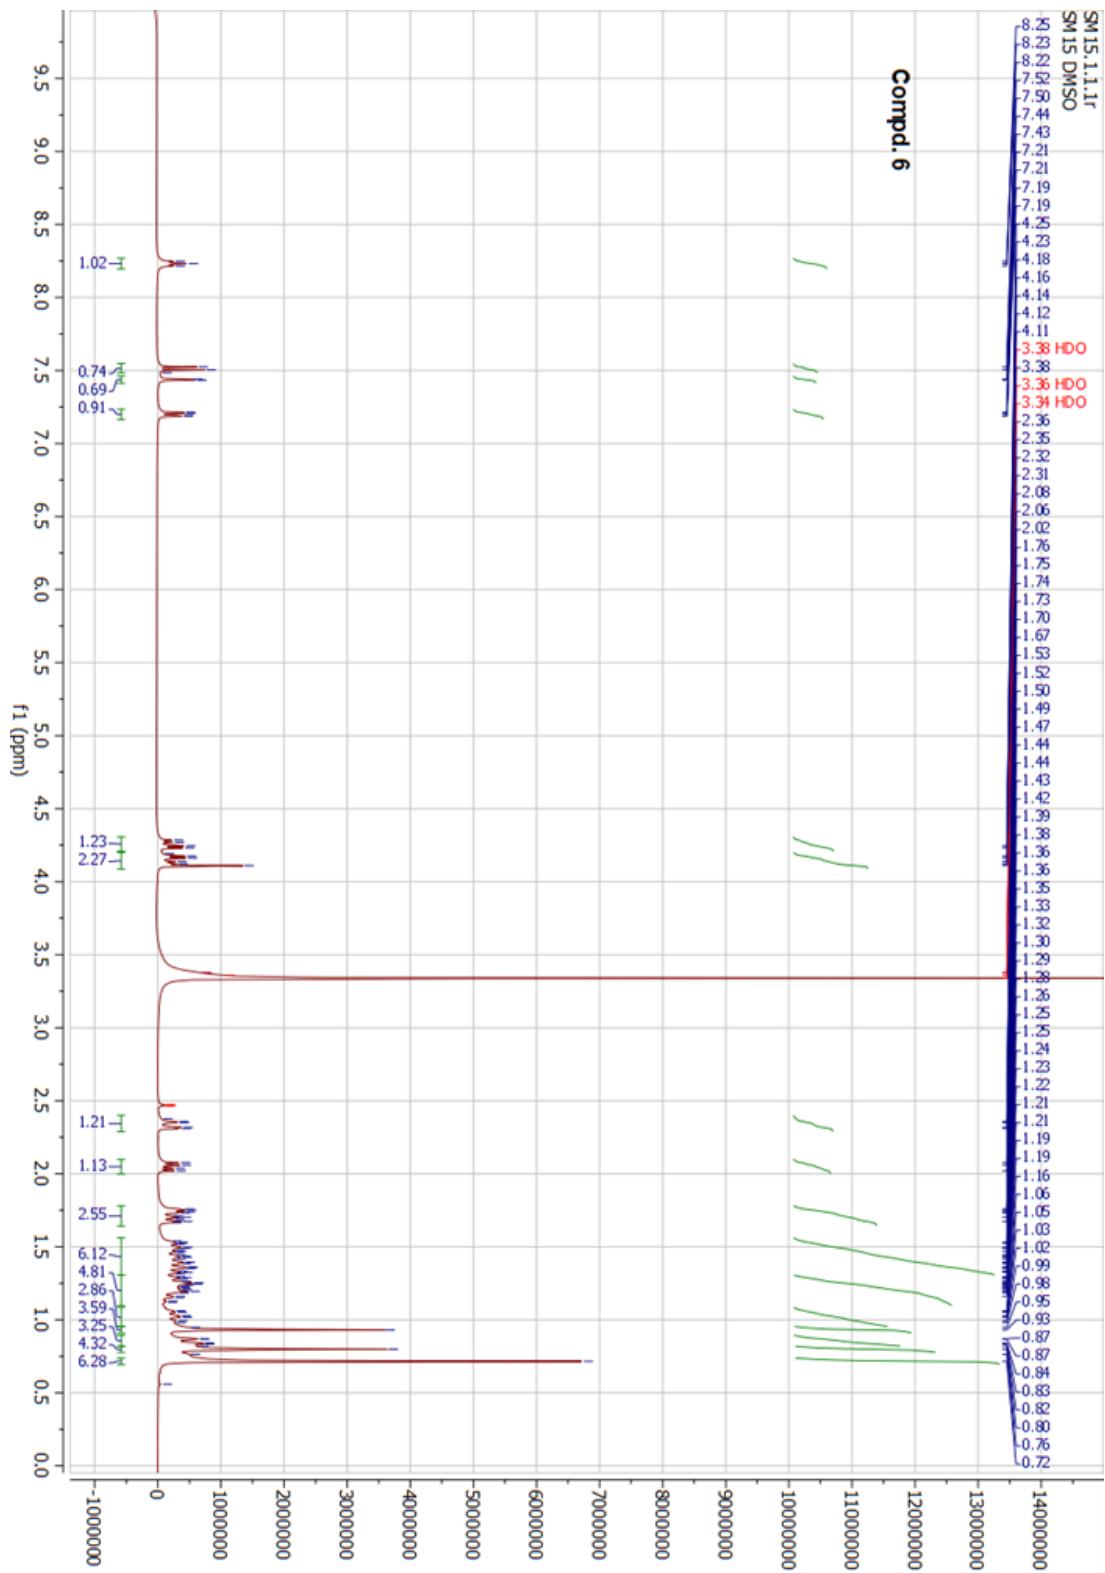

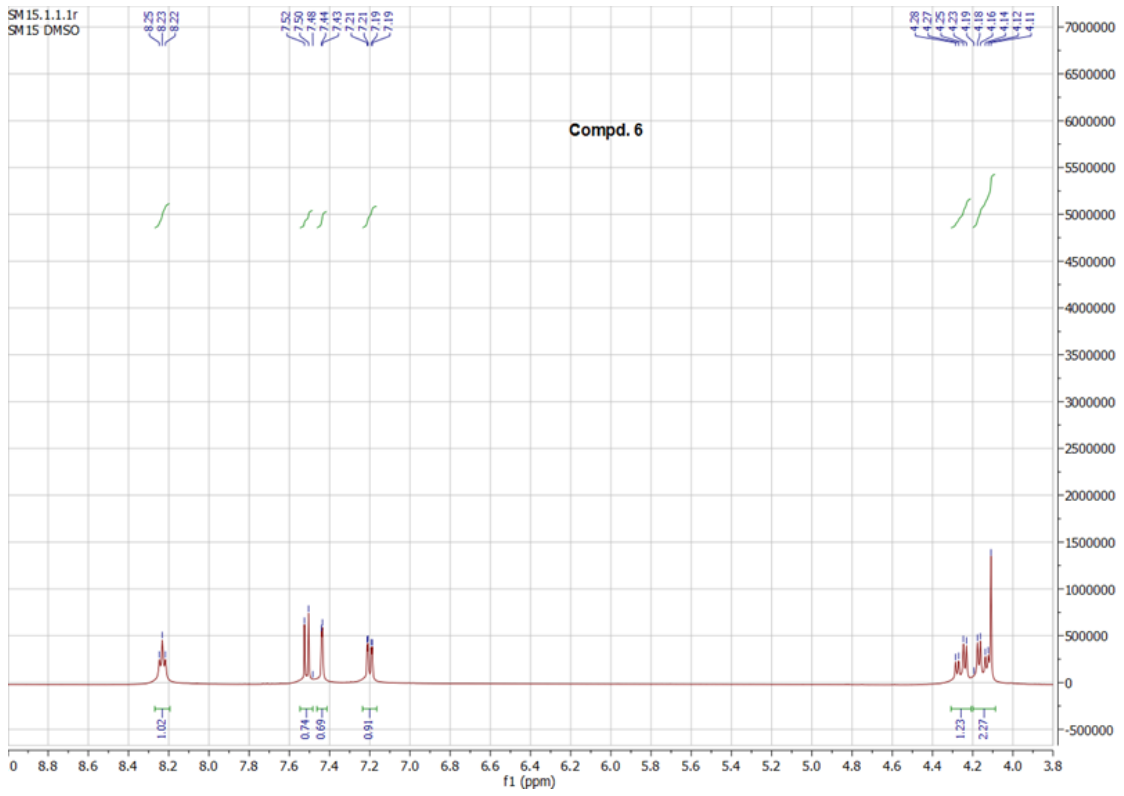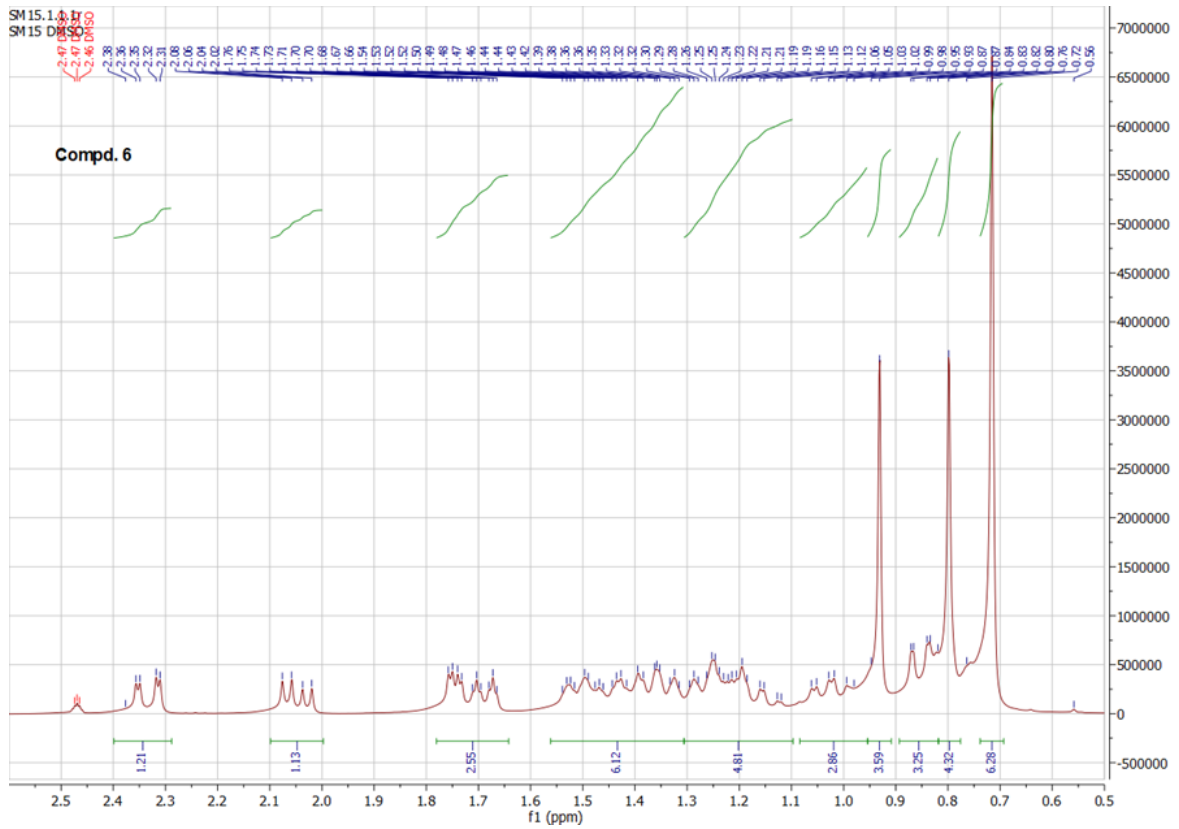

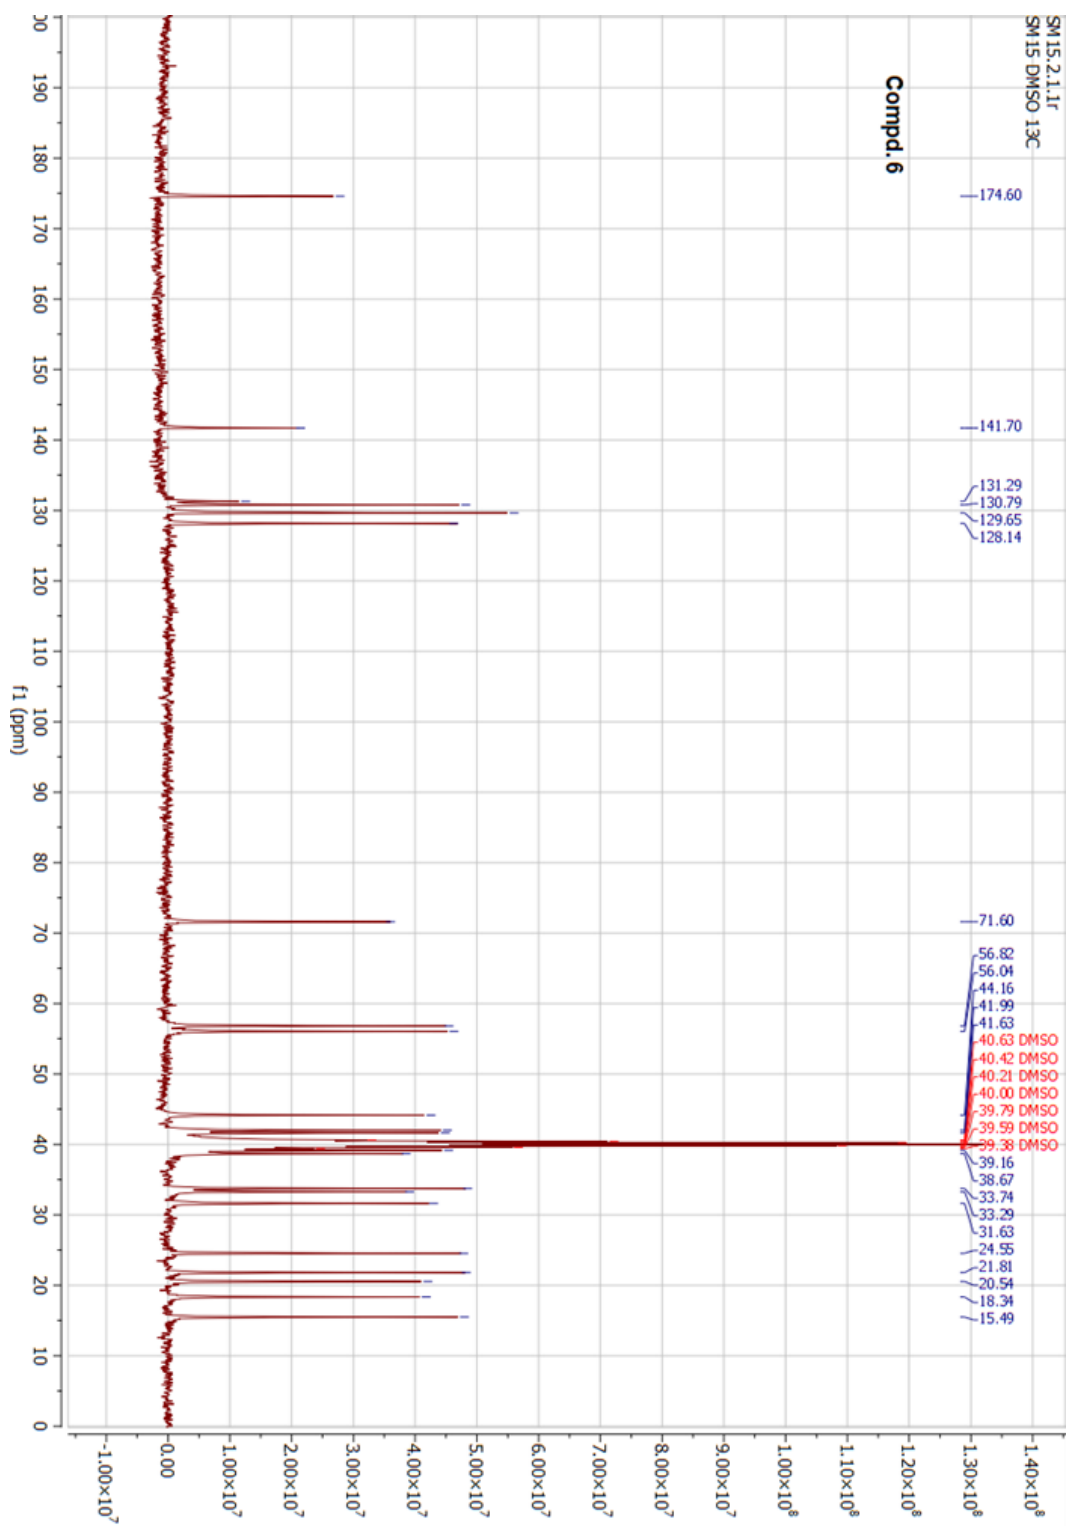

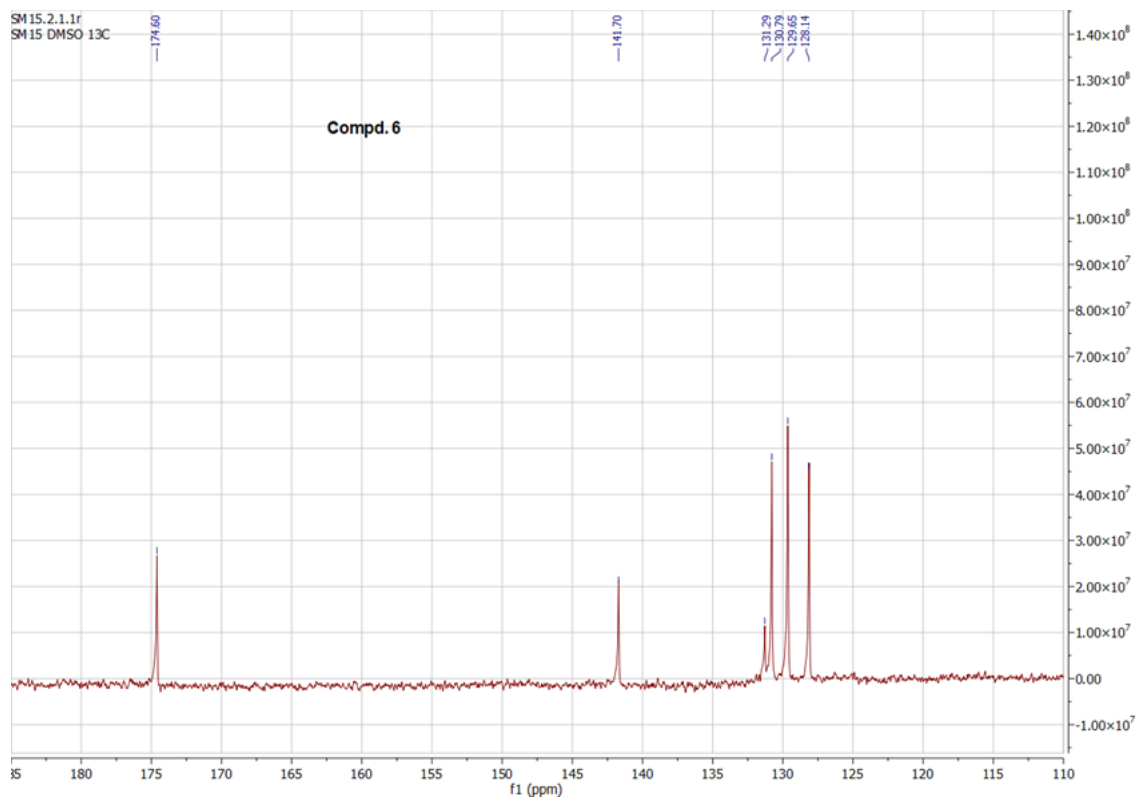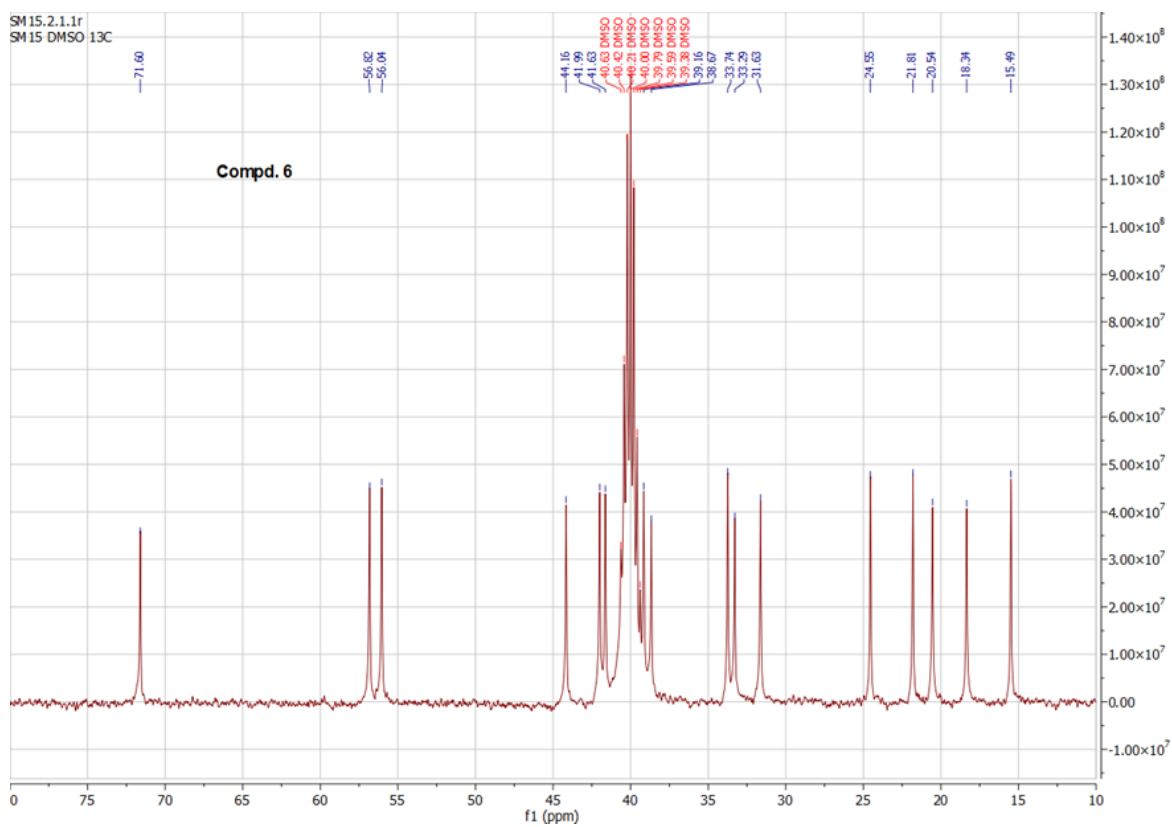

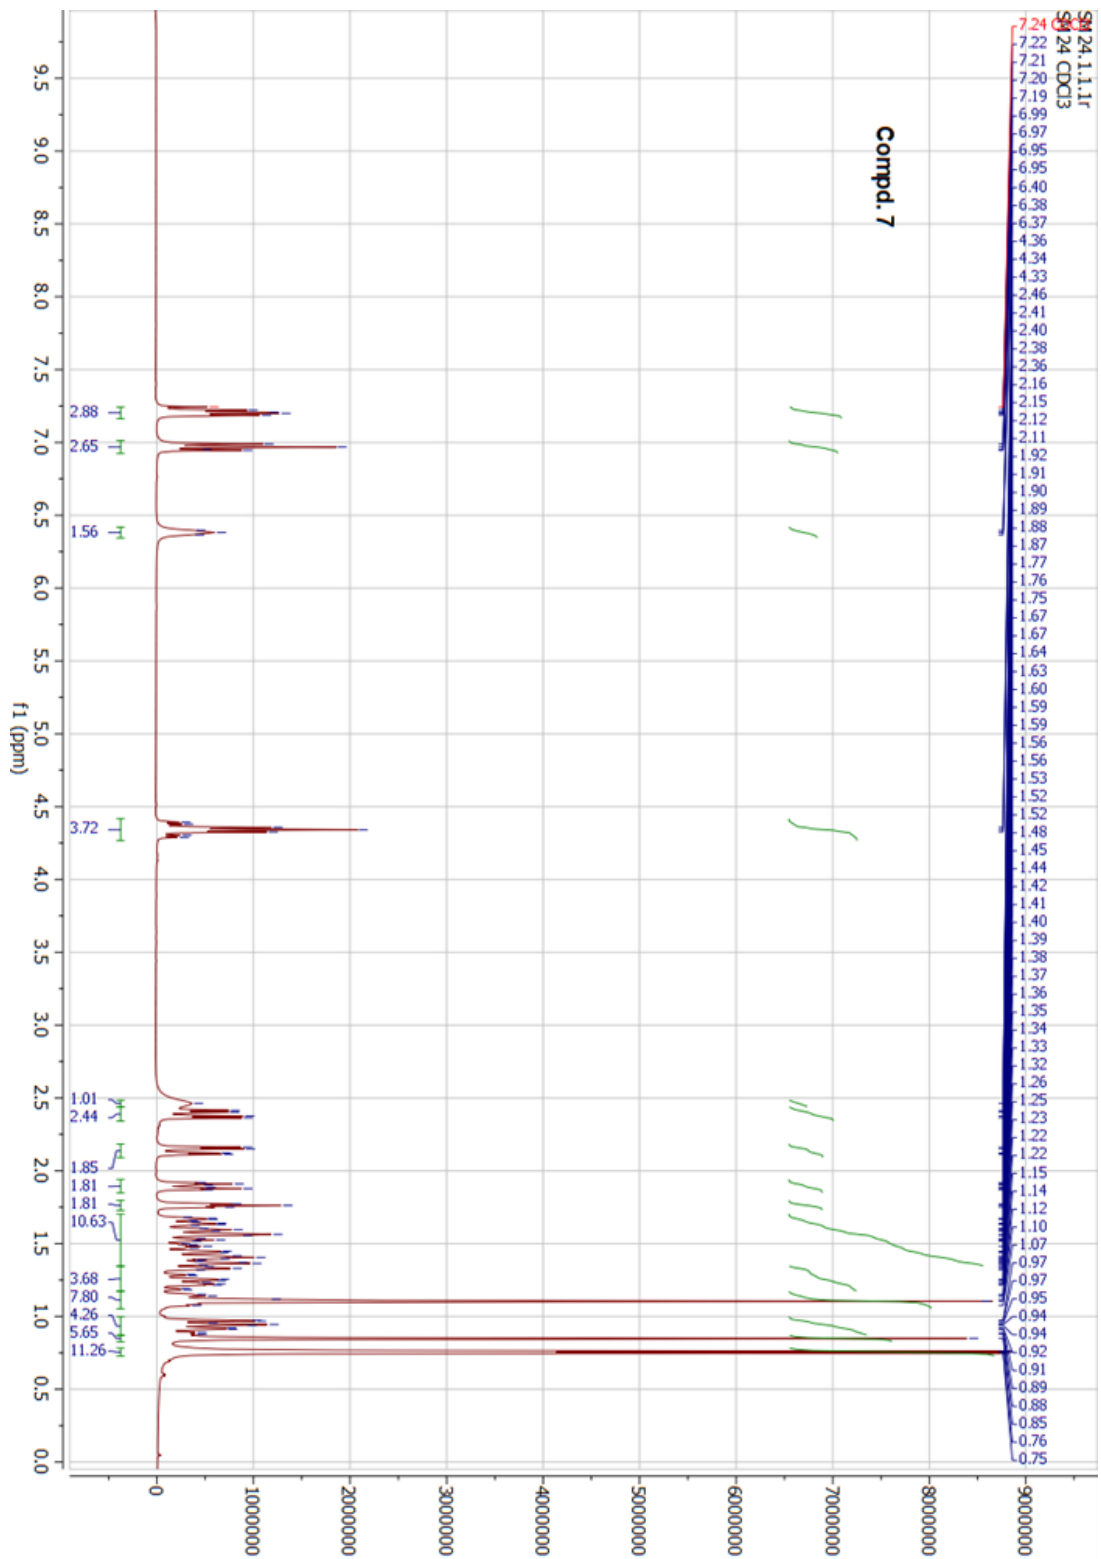

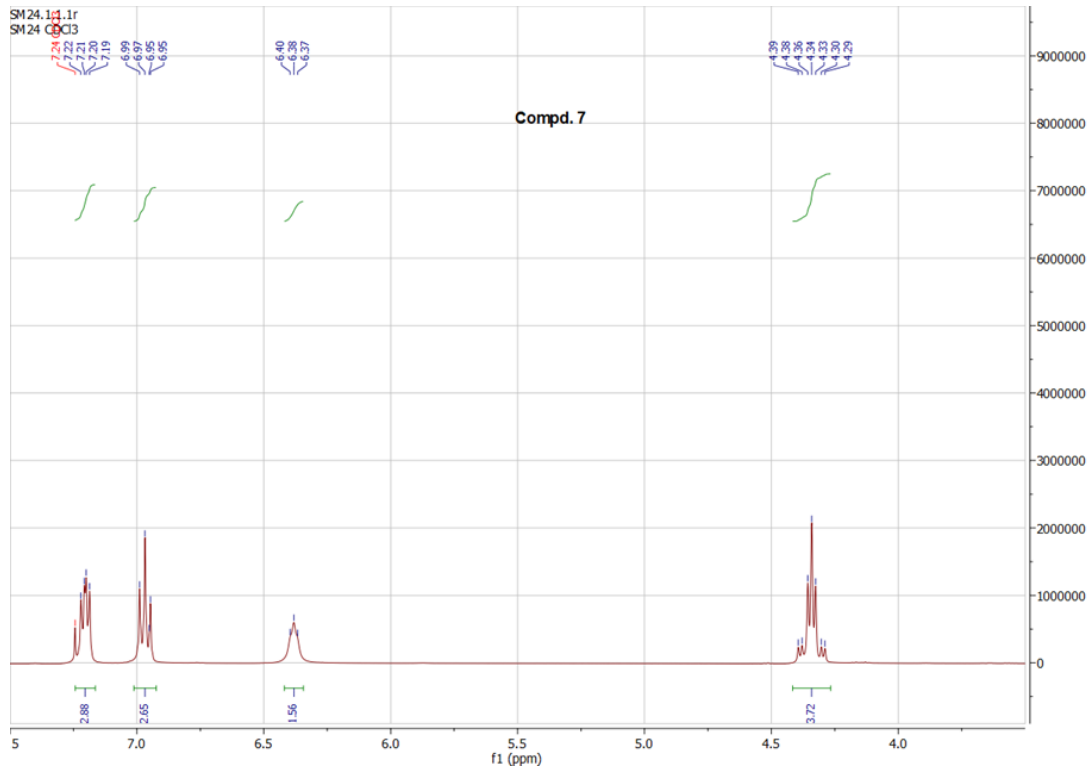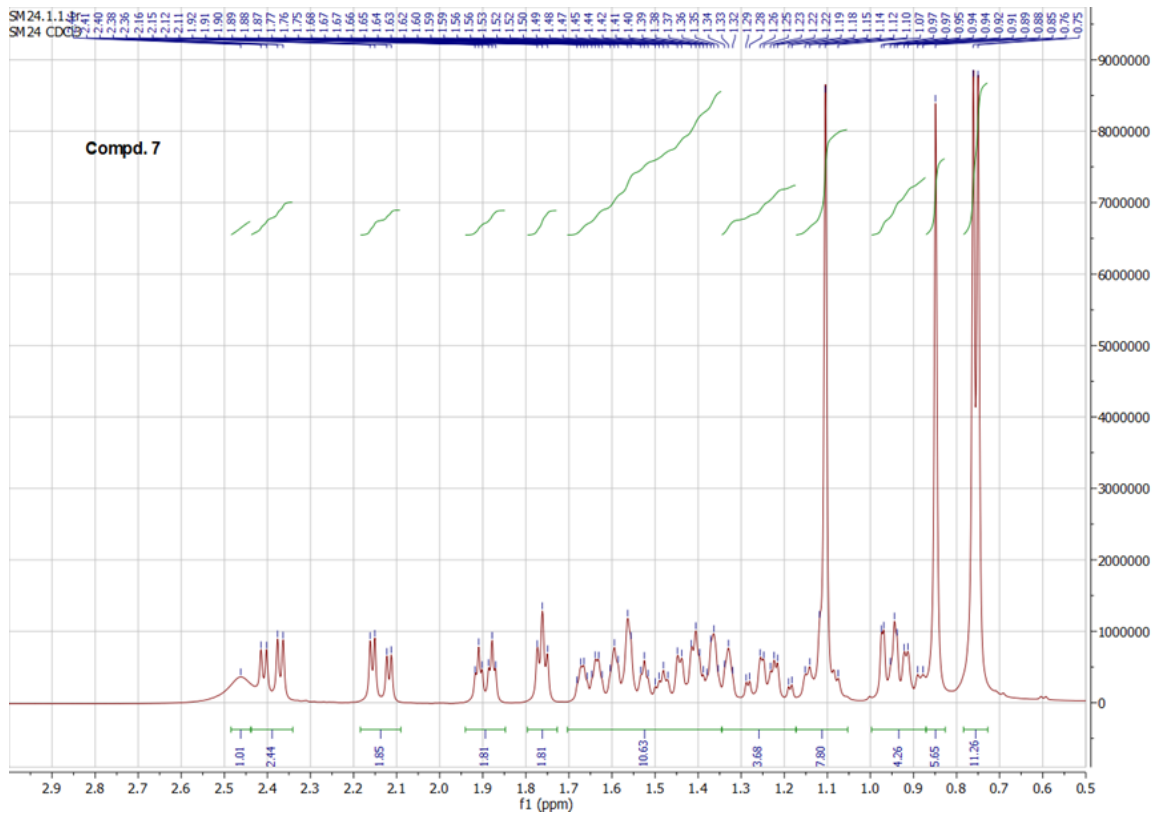



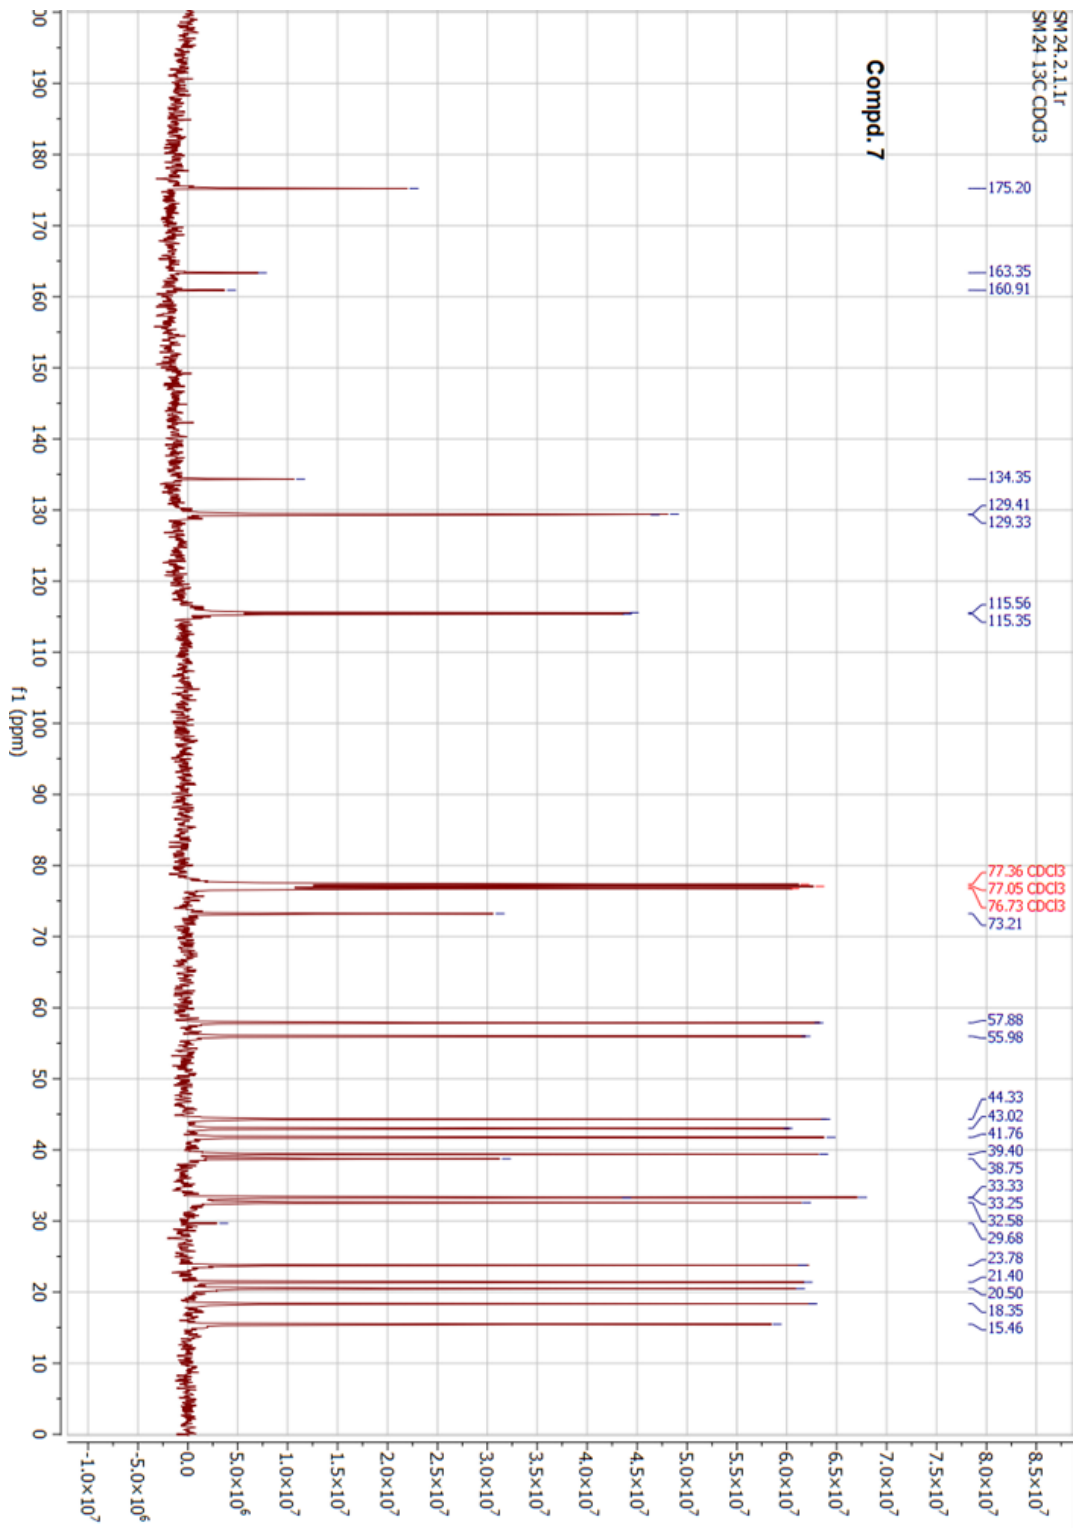

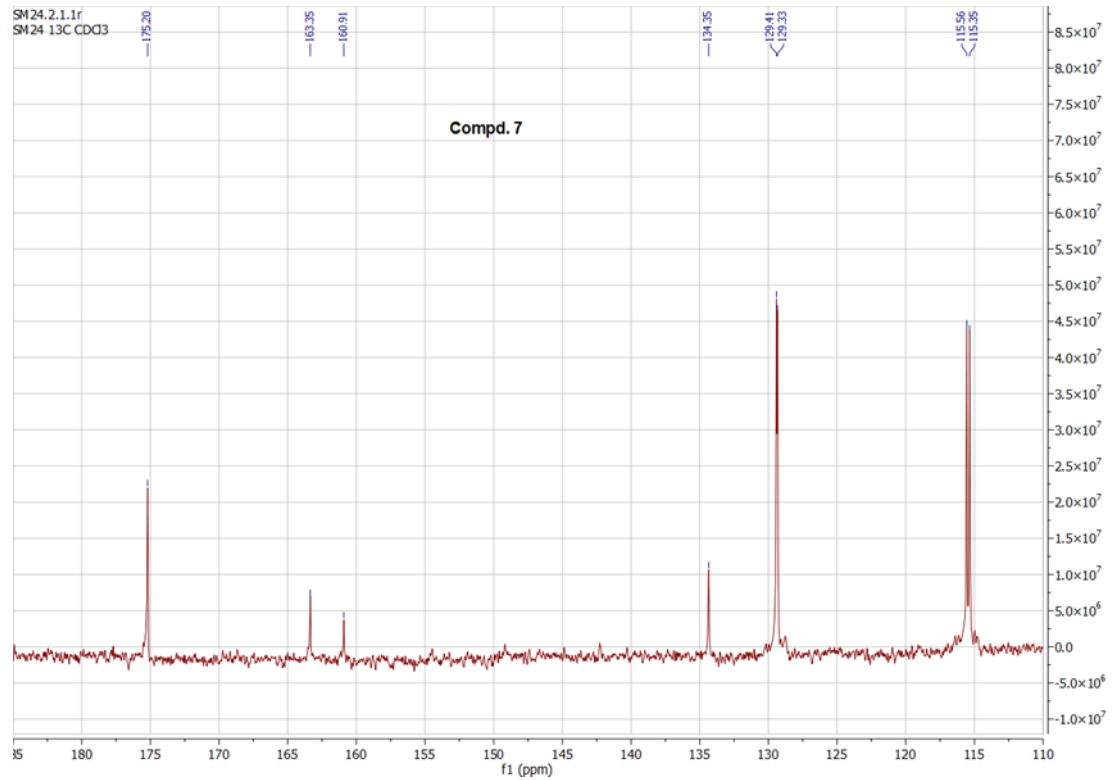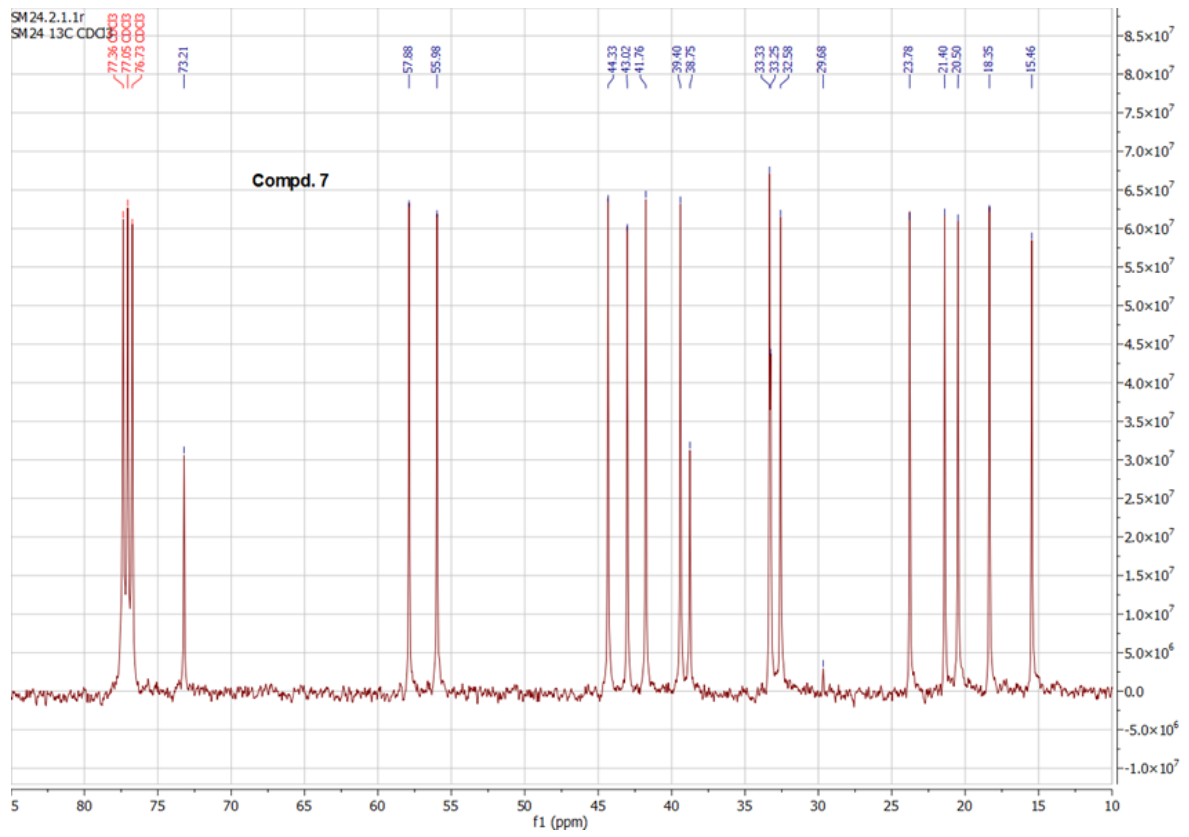

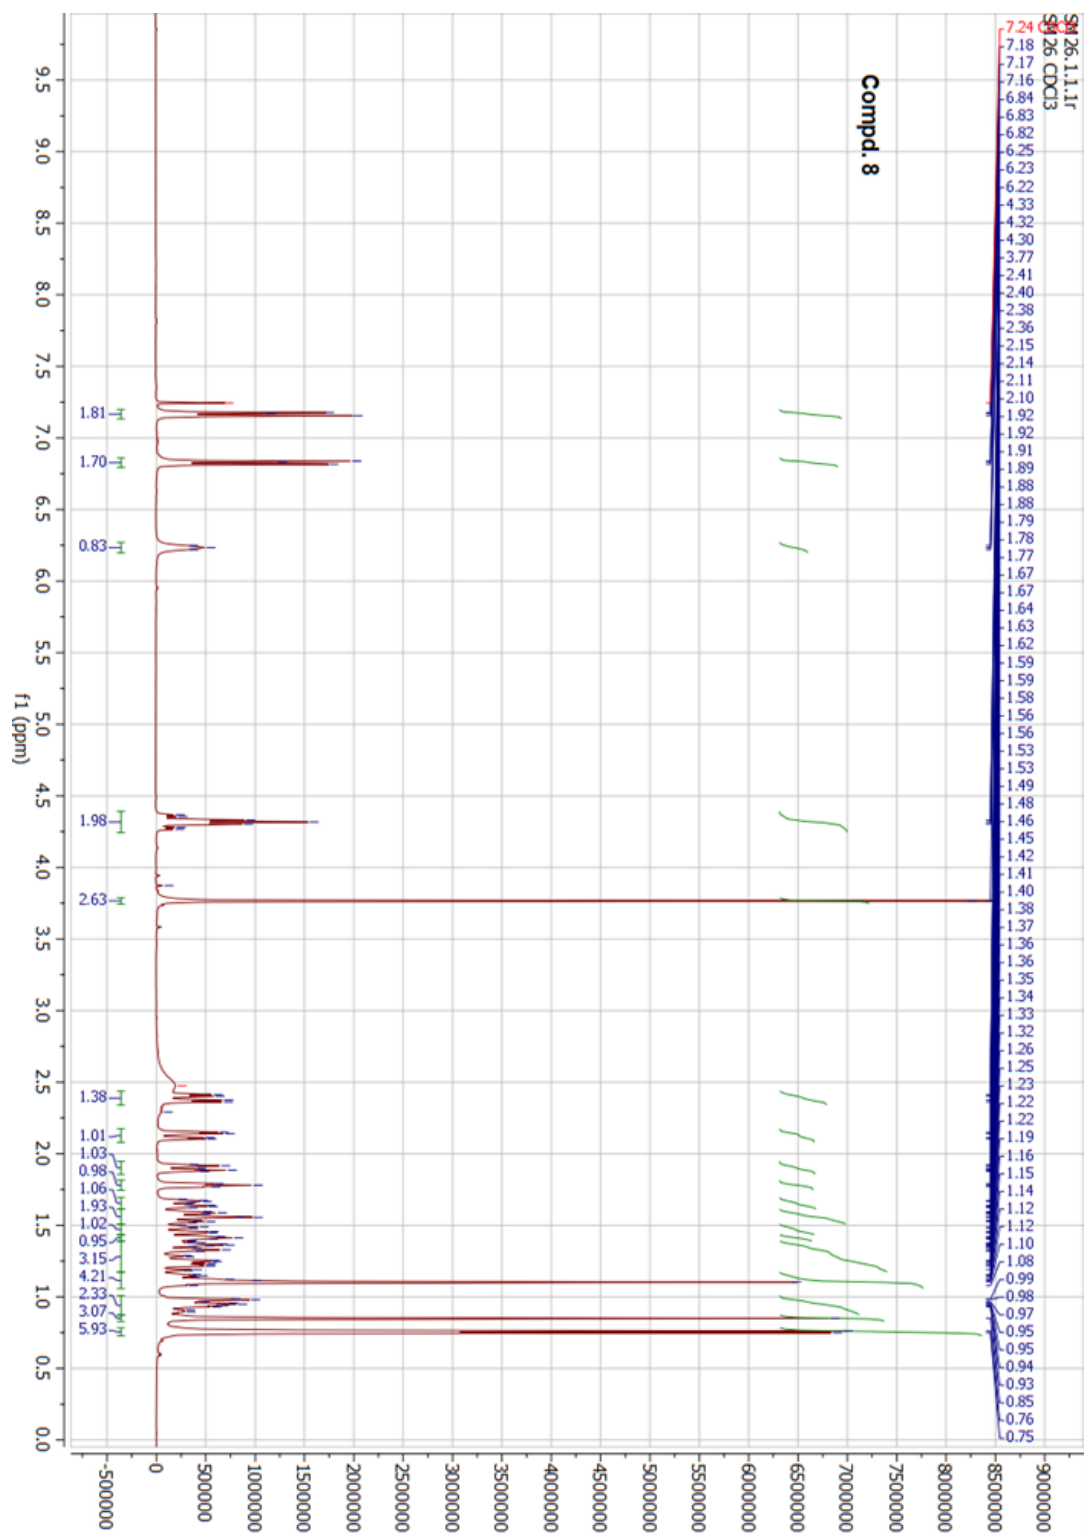

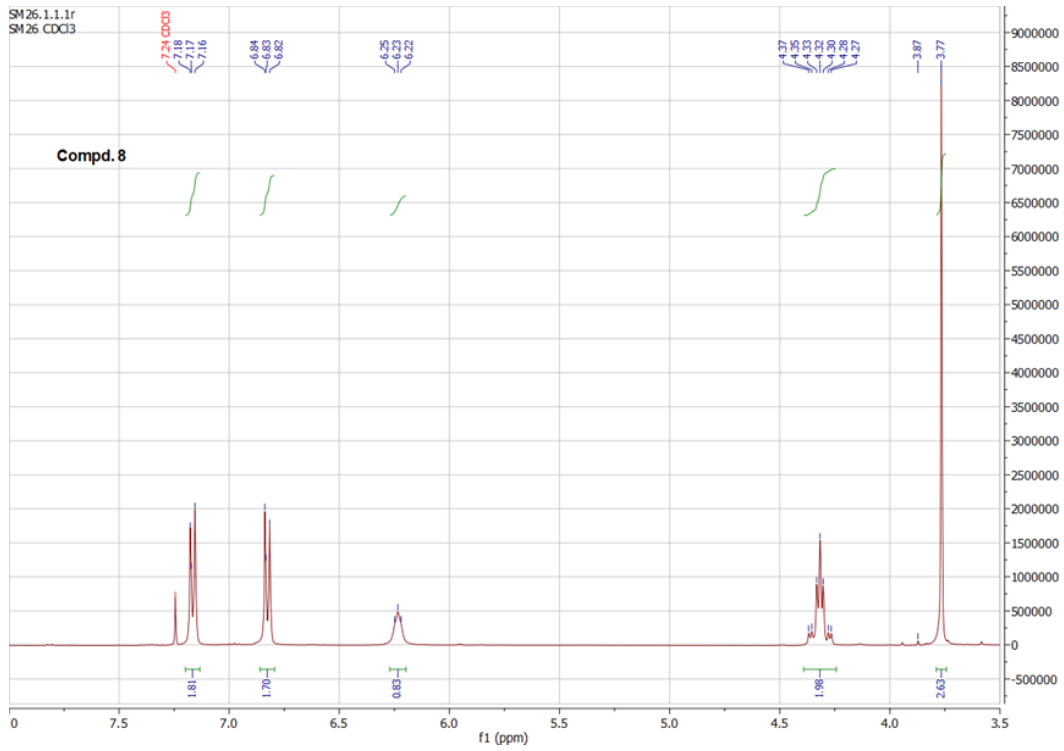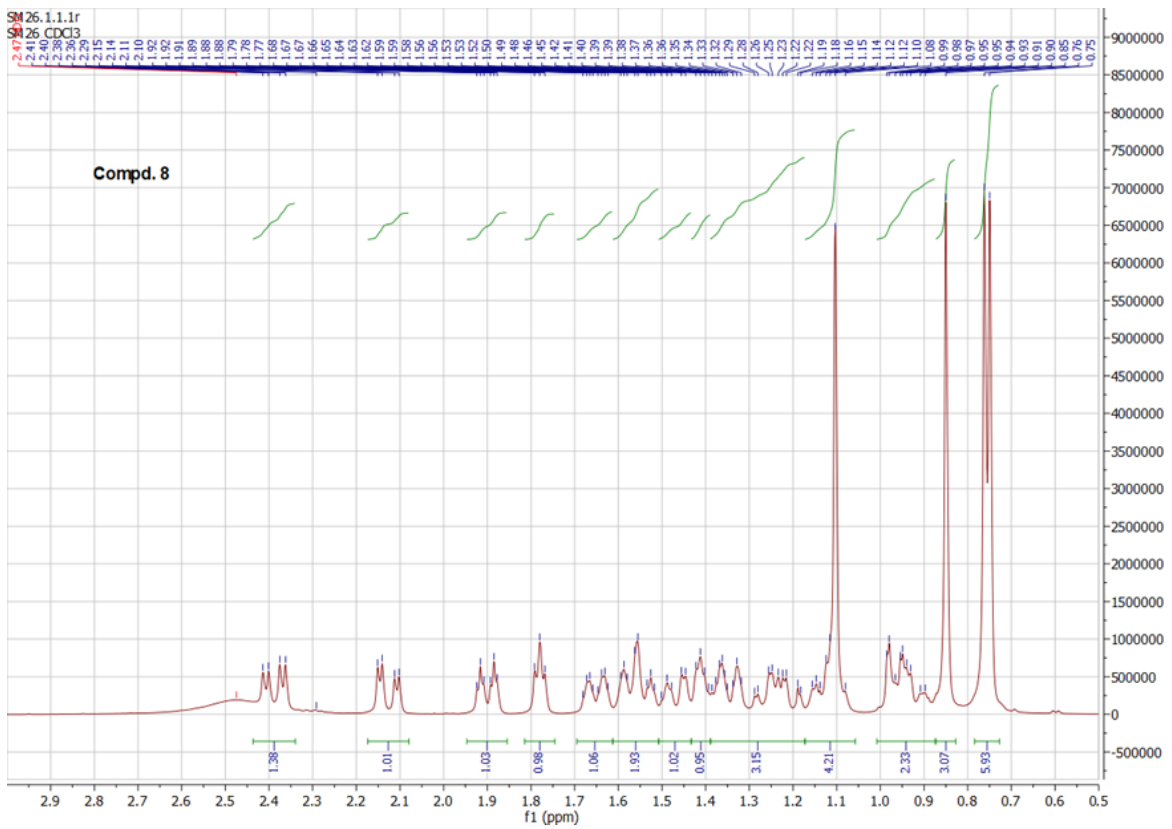

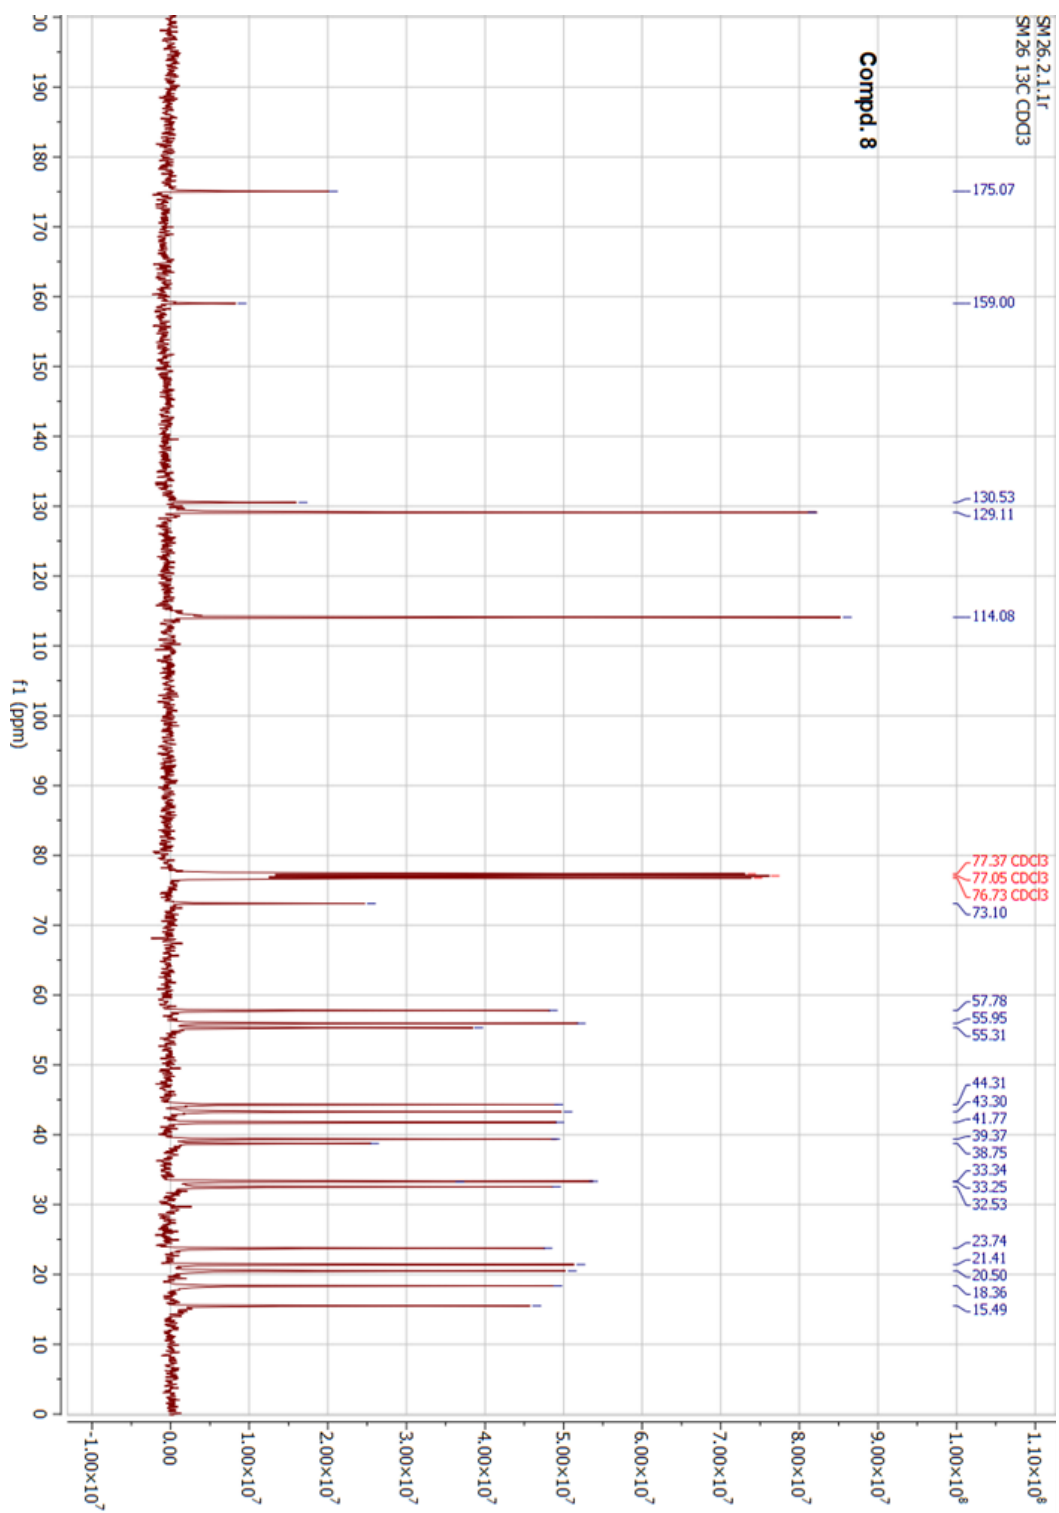

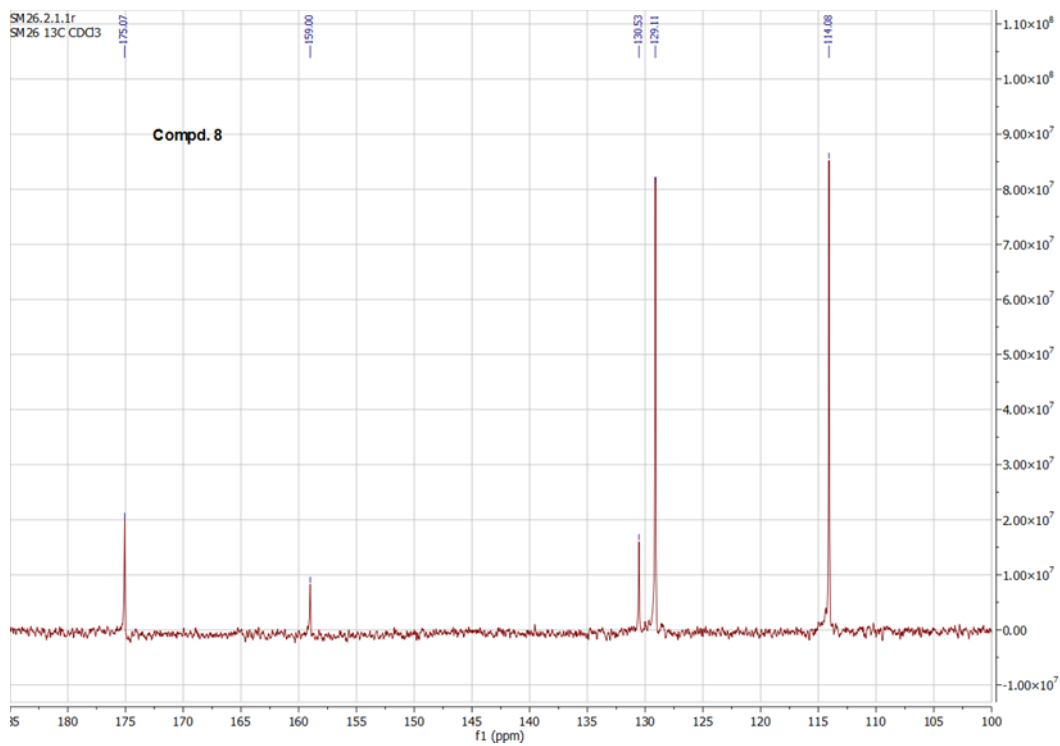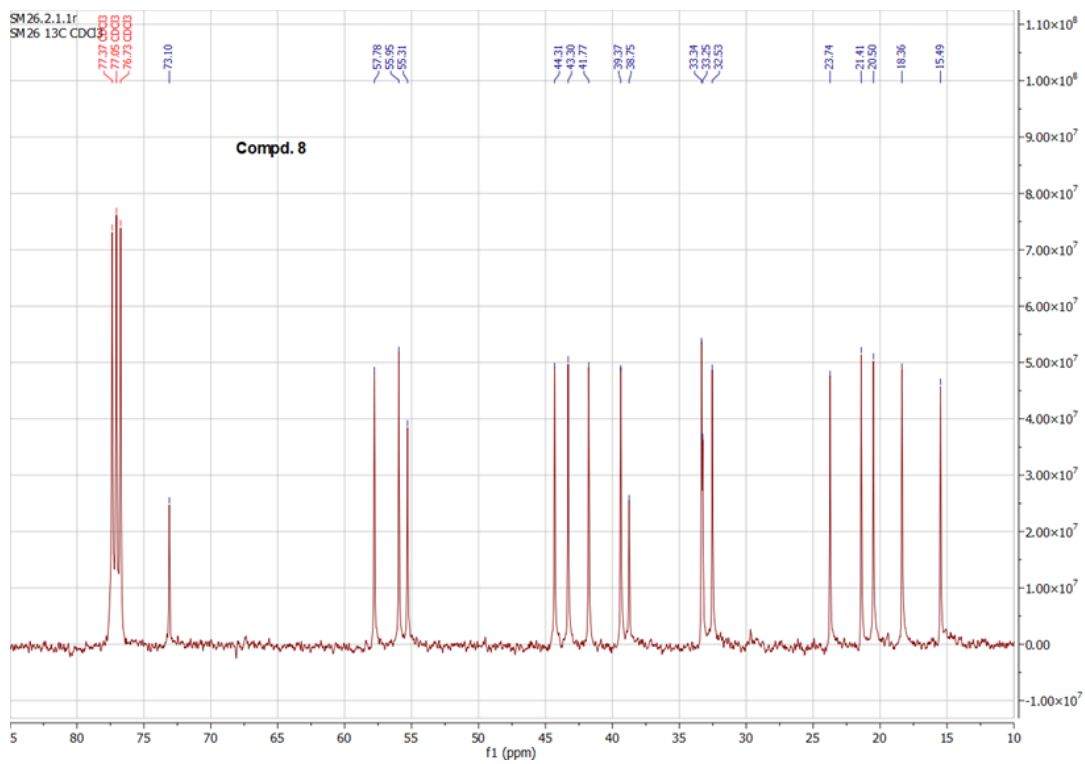

### Compd. 9

Current Data Parameters  
NAME SMT (M3) C0C13  
EXPTNO 1  
PROCNO 1

F2 - Acquisition Parameters  
Date\_ 20190123  
Time\_ 10.13  
INSTRUM spect  
PROBHD 5 mm 1H ZB284/  
PULPROG zgpg30  
TD 65536  
SOLVENT CDCl3  
NS 24  
DS 0  
SWH 4194.631 MHz  
FIDRES 0.044005 MHz  
AQ 7.811941 sec  
RG 327.5  
DE 119.700 usec  
TE 300.0 K  
D1 2.0000000 sec

===== CHANNEL f1 =====  
NUC1 1H  
P1 6.80 usec  
PL1 -3.00 dB  
SFO1 300.1319508 MHz

F2 - Processing parameters  
SI 32768  
SF 300.1300174 MHz  
WDW EM  
SSB 0  
LB 0.00 MHz  
GB 0  
PC 0.50

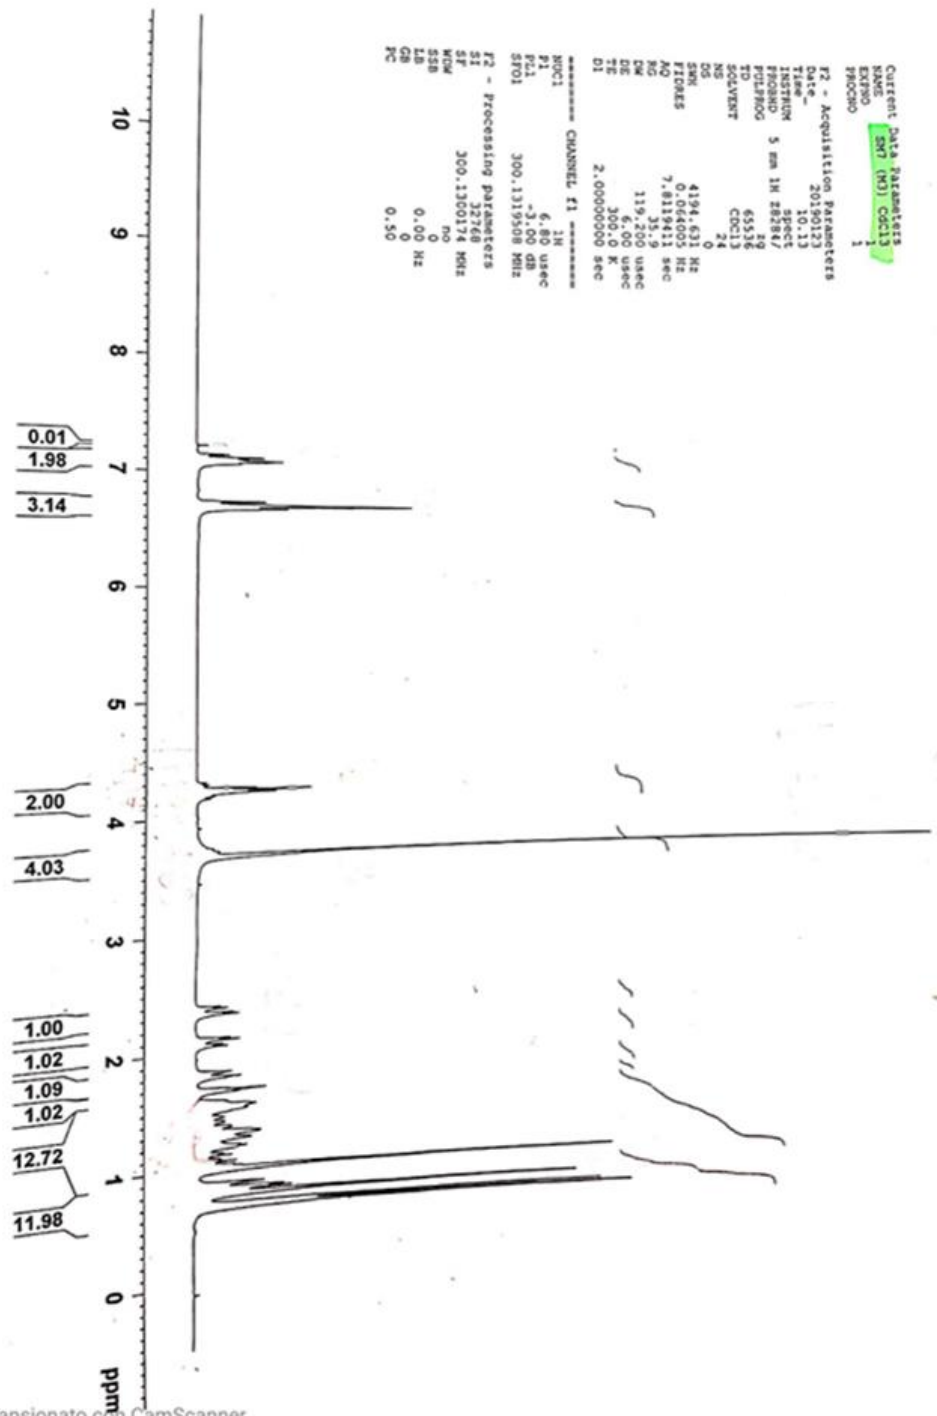

# Compd. 9

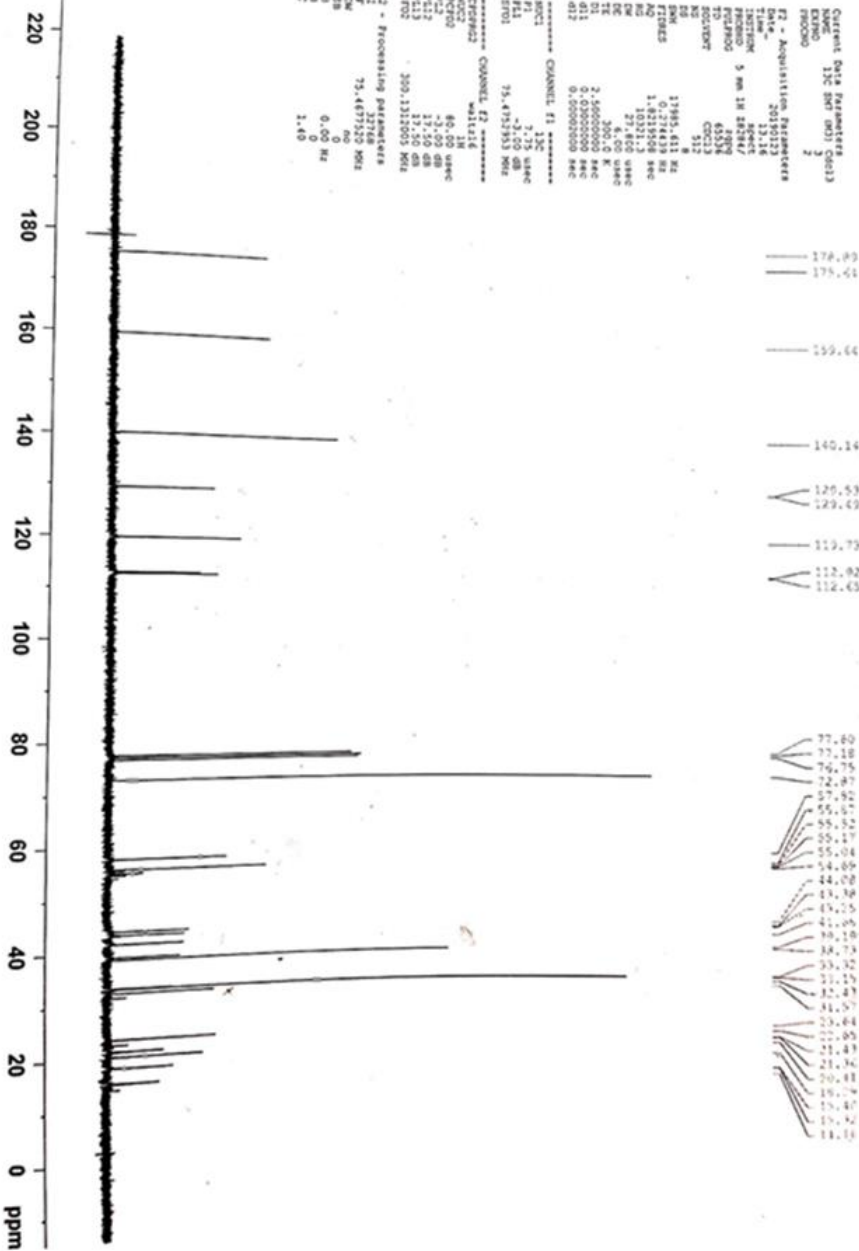



Compd. 10

Current Data Parameters  
 NAME SM22 C0C11  
 EXPMO 1  
 PROCNO 1

F2 - Acquisition Parameters  
 Date\_ 20190626  
 Time\_ 11:00:00  
 INSTRUM spect  
 PROBHD 5 mm 1H 28284/  
 PULPROG zg  
 TD 65536  
 SOLVENT C0C11  
 NS 44  
 DS 4  
 SWH 4194.631 Hz  
 FIDRES 0.064005 Hz  
 AQ 7.819411 sec  
 RG 16  
 DW 119.200 usec  
 DE 6.00 usec  
 TE 300.2 K  
 D1 2.0000000 sec

\*\*\*\*\* CHANNEL f1 \*\*\*\*\*  
 NUC1 1H  
 P1 6.80 usec  
 PL1 -3.00 dB  
 SFO1 300.1319508 MHz  
 F2 - Processing parameters  
 SI 32768  
 KW 300.1300174 MHz  
 SSB 0  
 LB 0  
 CB 0  
 PC 0.50

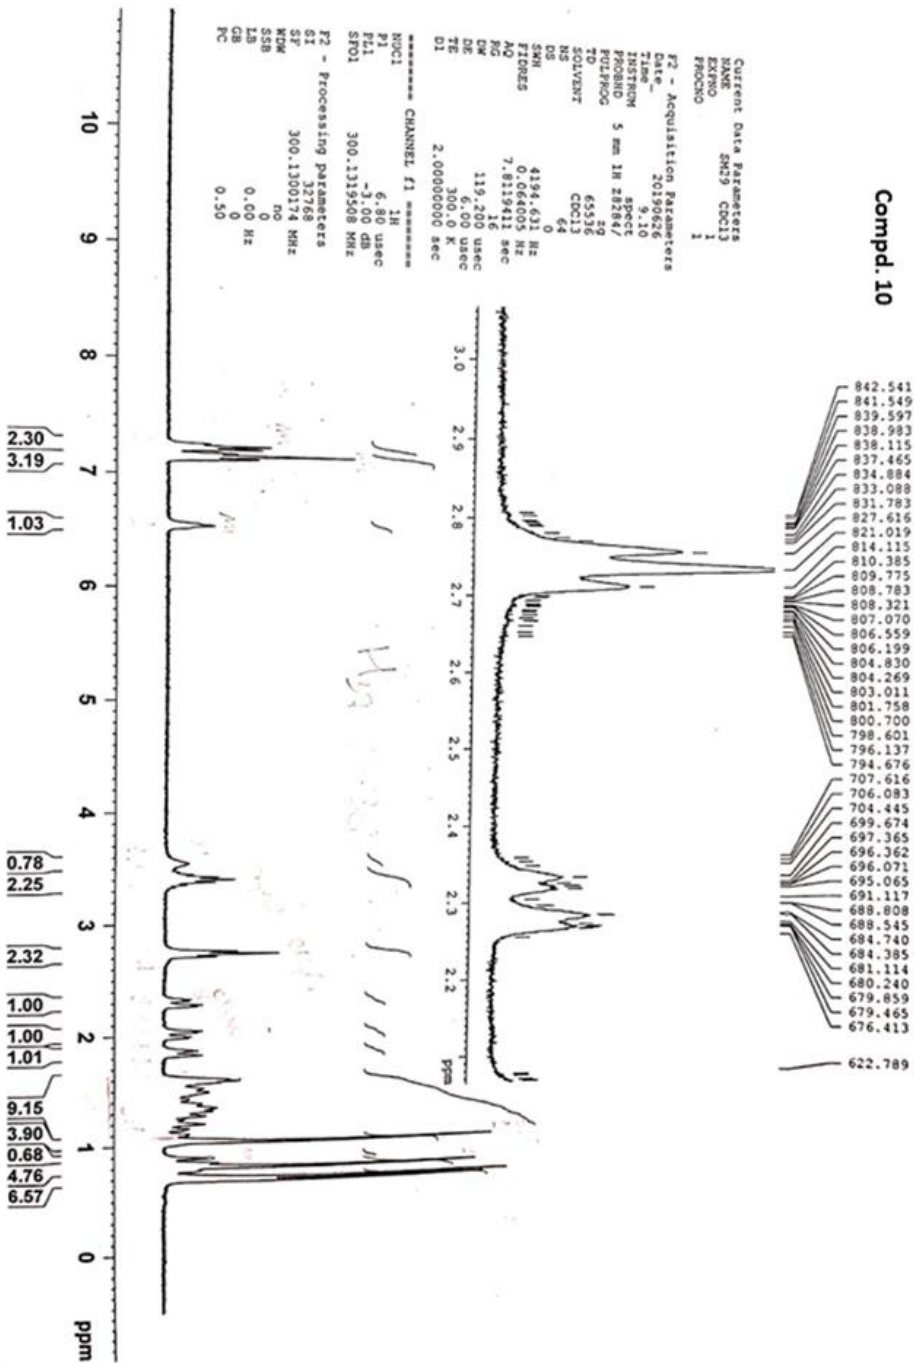

**Compd. 10**

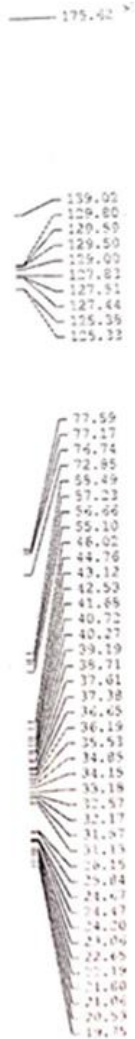

Current Data Parameters  
 NAME: 1X.DMS  
 EXPNO: 2  
 PROCNO: 2  
 F2 - Acquisition Parameters  
 Date\_ : 20111102  
 Time : 11:03  
 INSTRUM: spect  
 PROBHD: 5 mm 1H ZGR30  
 PULPROG: zgpg30  
 TO: 65536  
 SFO: 500.13605  
 AQ: 5.17  
 SOLVENT: CDCl3  
 NS: 512  
 DS: 4  
 SWH: 12484.48 Hz  
 FWHM: 0.251413 Hz  
 AQ: 0.251413 Hz  
 SFO: 500.13605 MHz  
 ACQ: 1.821908 sec  
 N2: 11981.2  
 SC: 11981.2  
 EM: 6.00 usec  
 TE: 300.2 K  
 D1: 2.0000000 sec  
 d12: 0.0000000 sec  
 \*\*\*\*\* CHANNEL f1 \*\*\*\*\*  
 NUC1: 13C  
 P1: 1.25 usec  
 PL1: 0 dB  
 FREQ1: 75.4732953 MHz  
 \*\*\*\*\* CHANNEL f2 \*\*\*\*\*  
 C13P1PRG2: zgpg30  
 NUC2: 13C  
 P2: 1.25 usec  
 PL2: 0 dB  
 FREQ2: 75.4732953 MHz  
 P3: 1.25 usec  
 PL3: 0 dB  
 F3: 75.4732953 MHz  
 SFO: 300.1360505 MHz  
 F7 - Processing parameters  
 SI: 32768 Hz  
 SF: 75.467128 MHz  
 DS: 4  
 SSB: 0  
 LB: 1.00 Hz  
 GB: 0  
 PC: 1.40

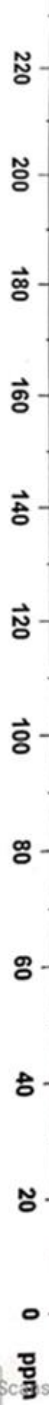

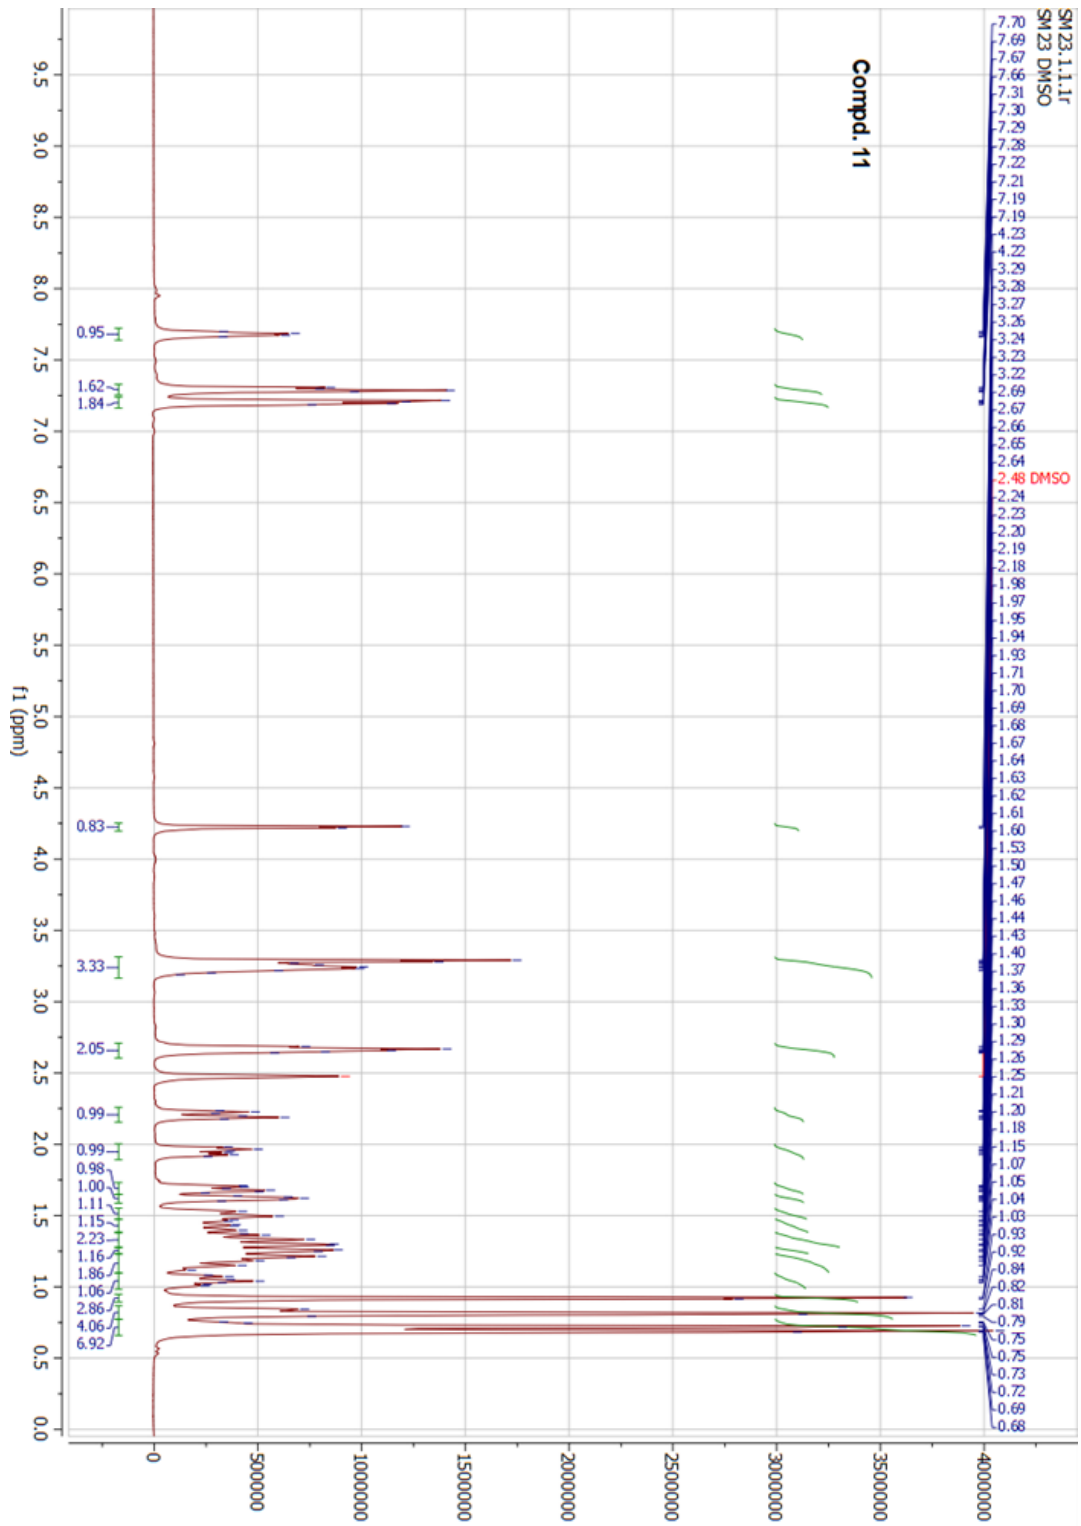

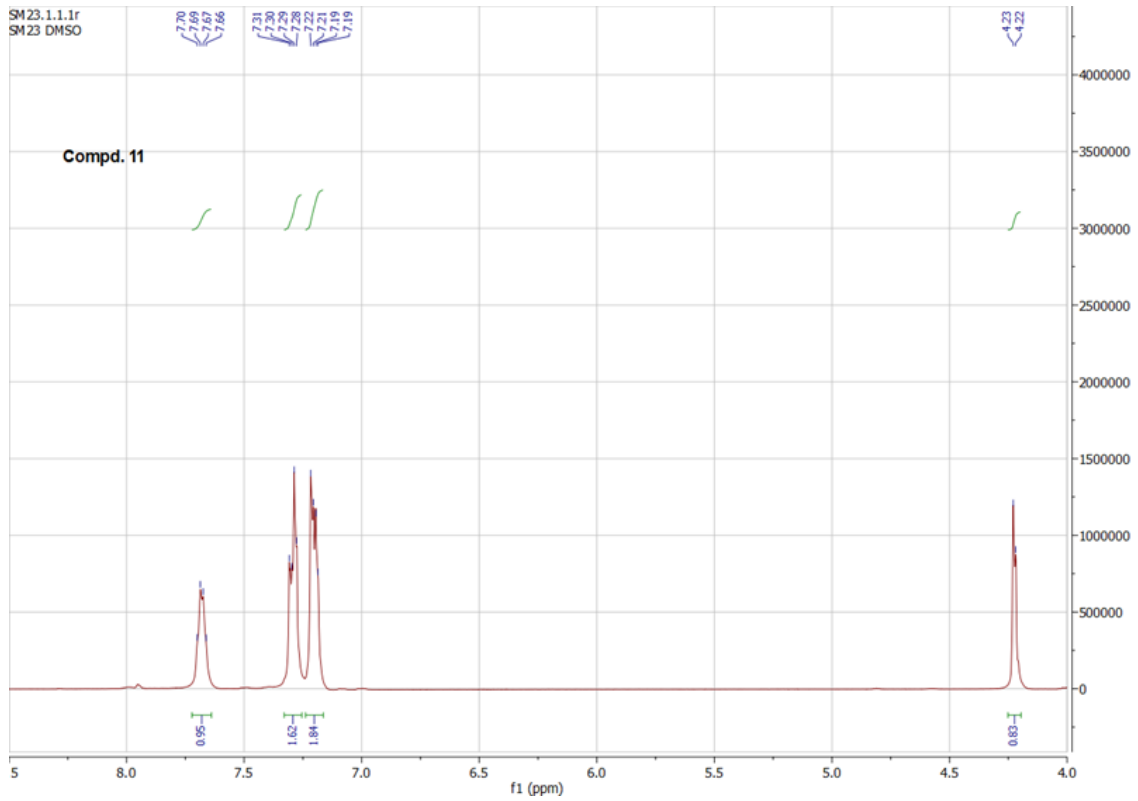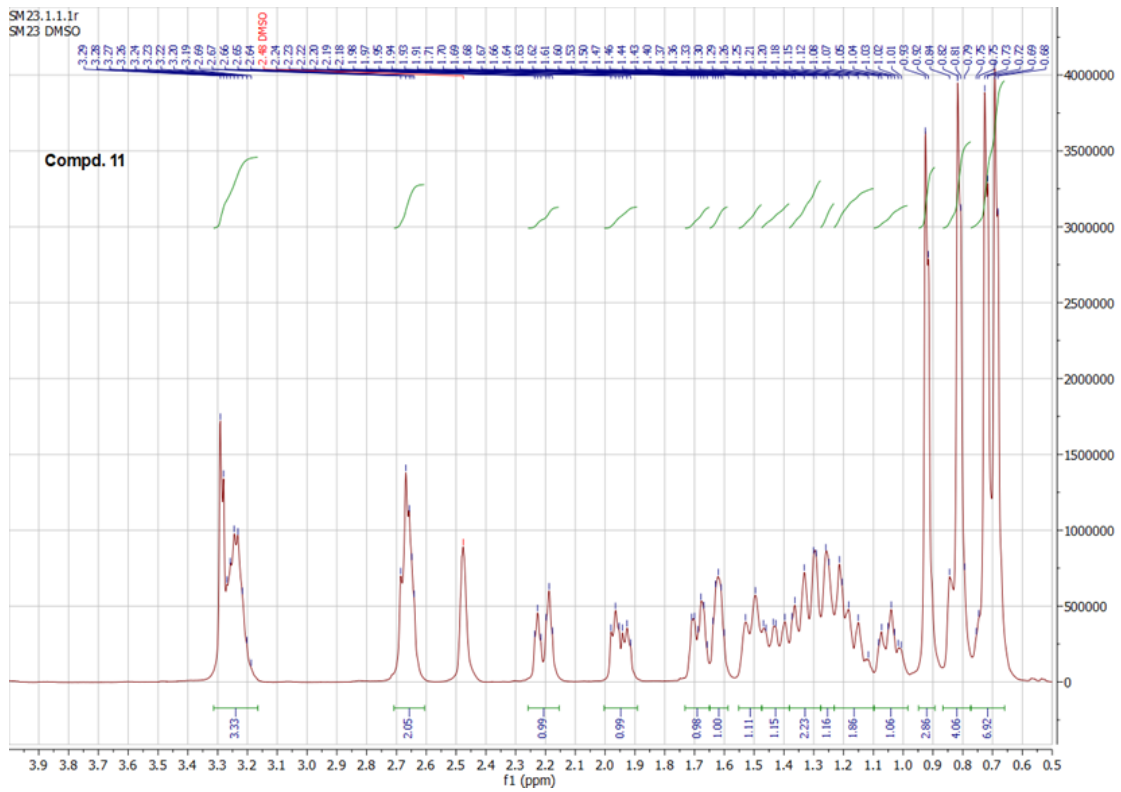

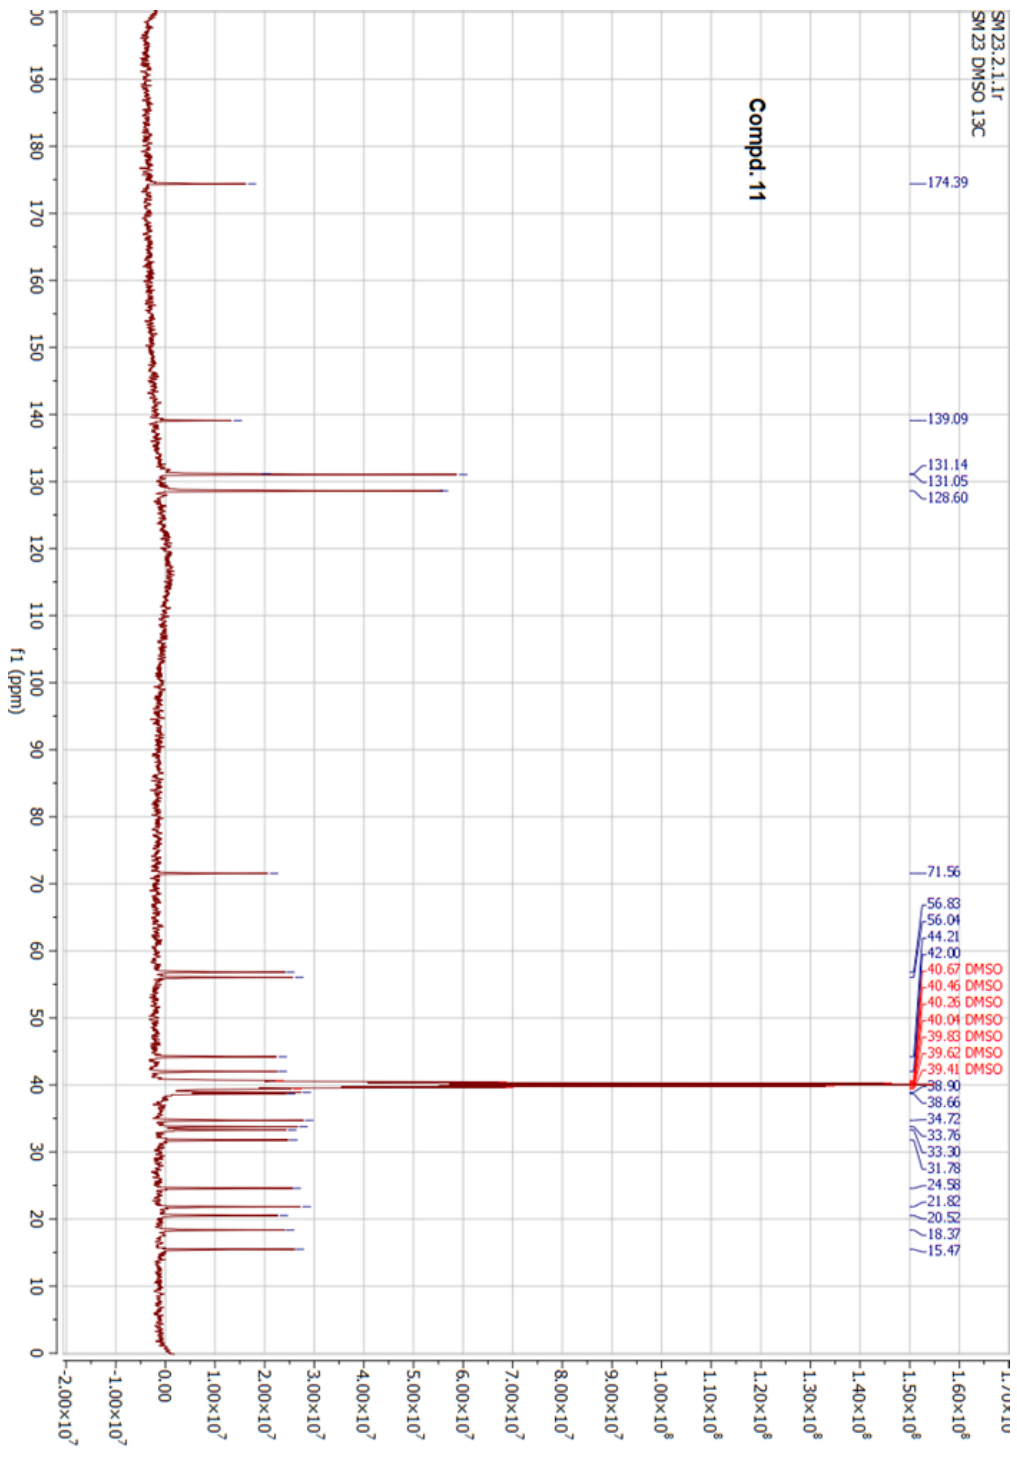

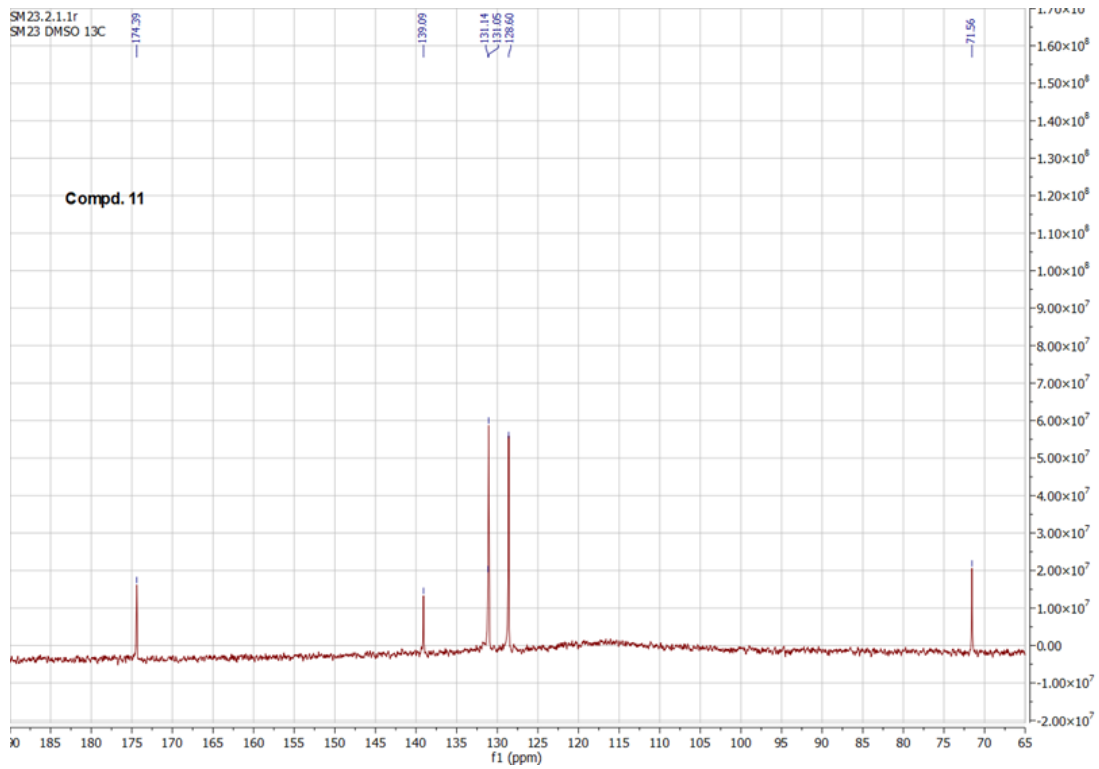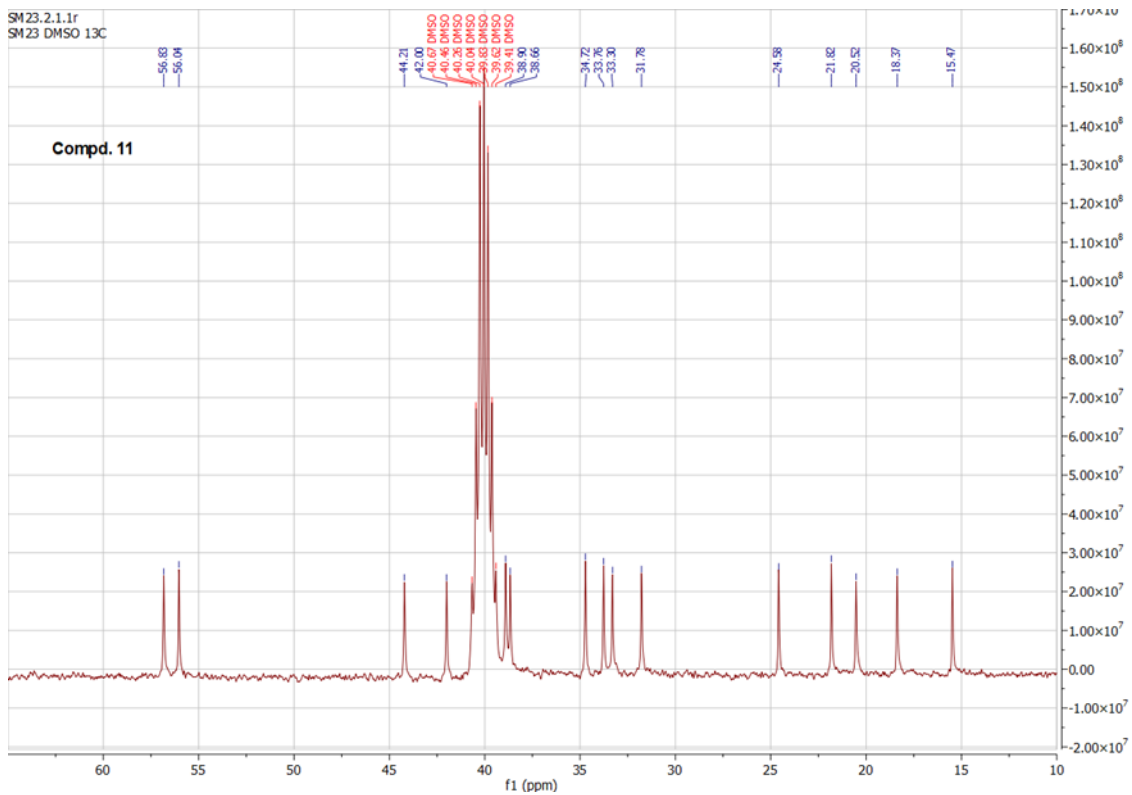

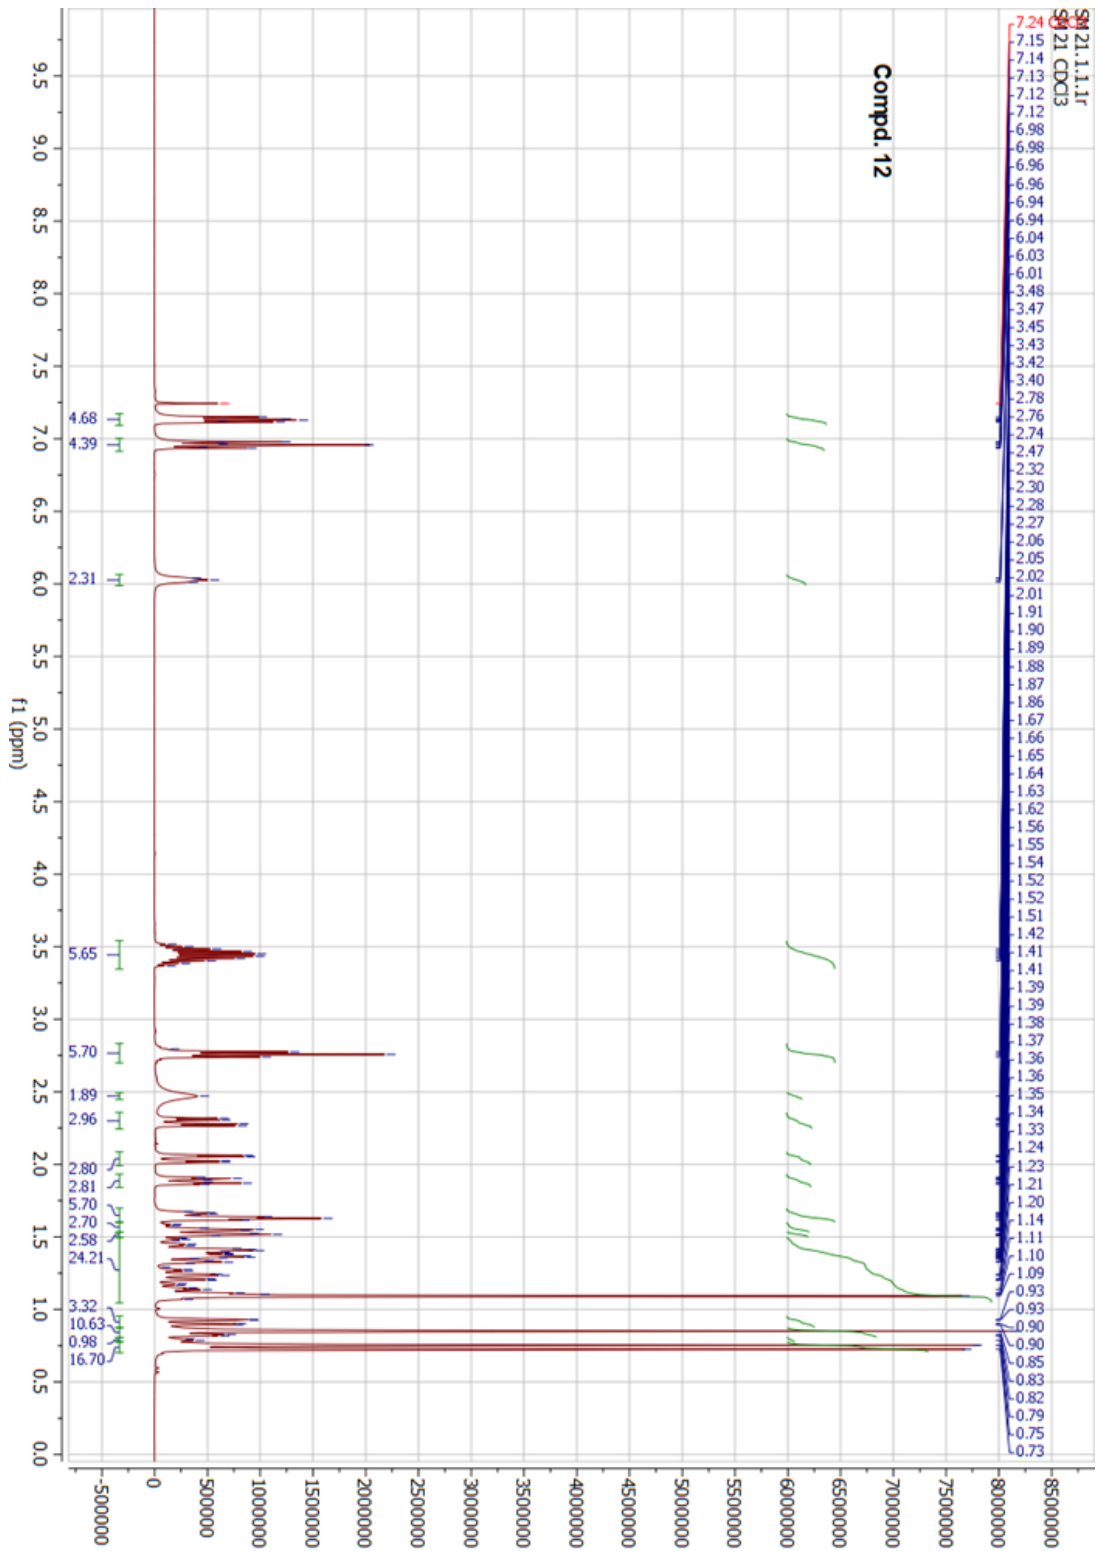

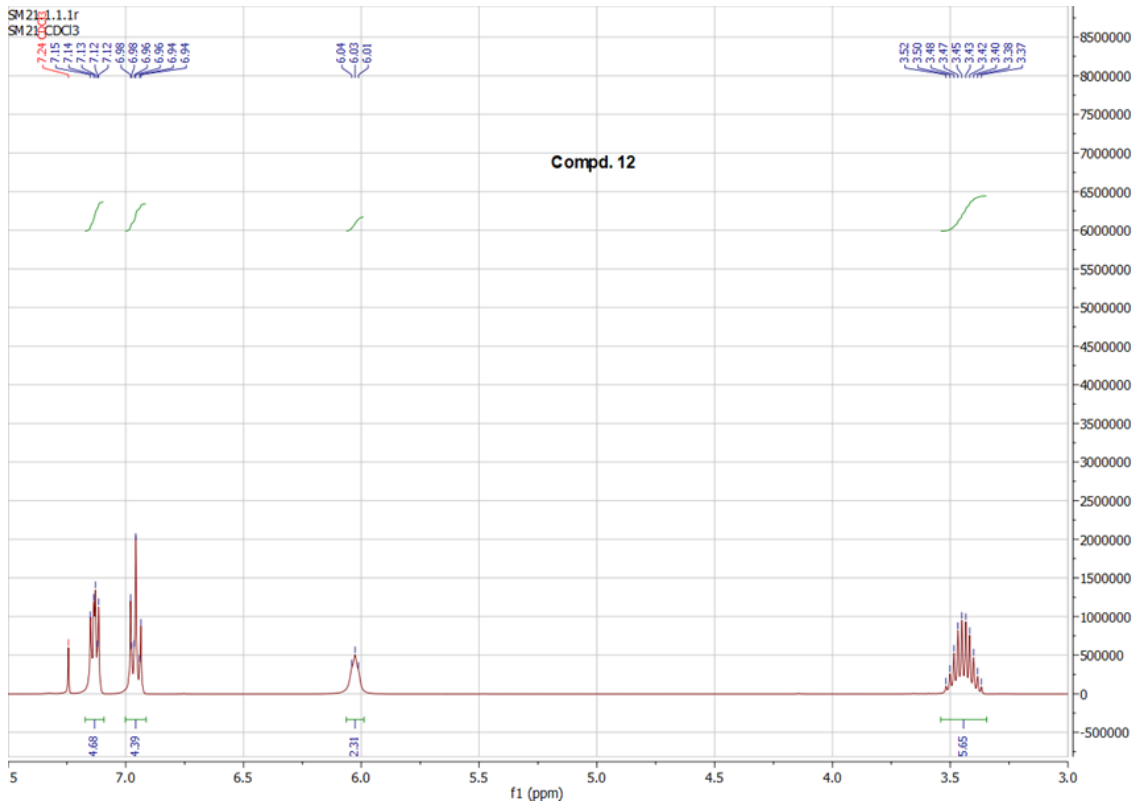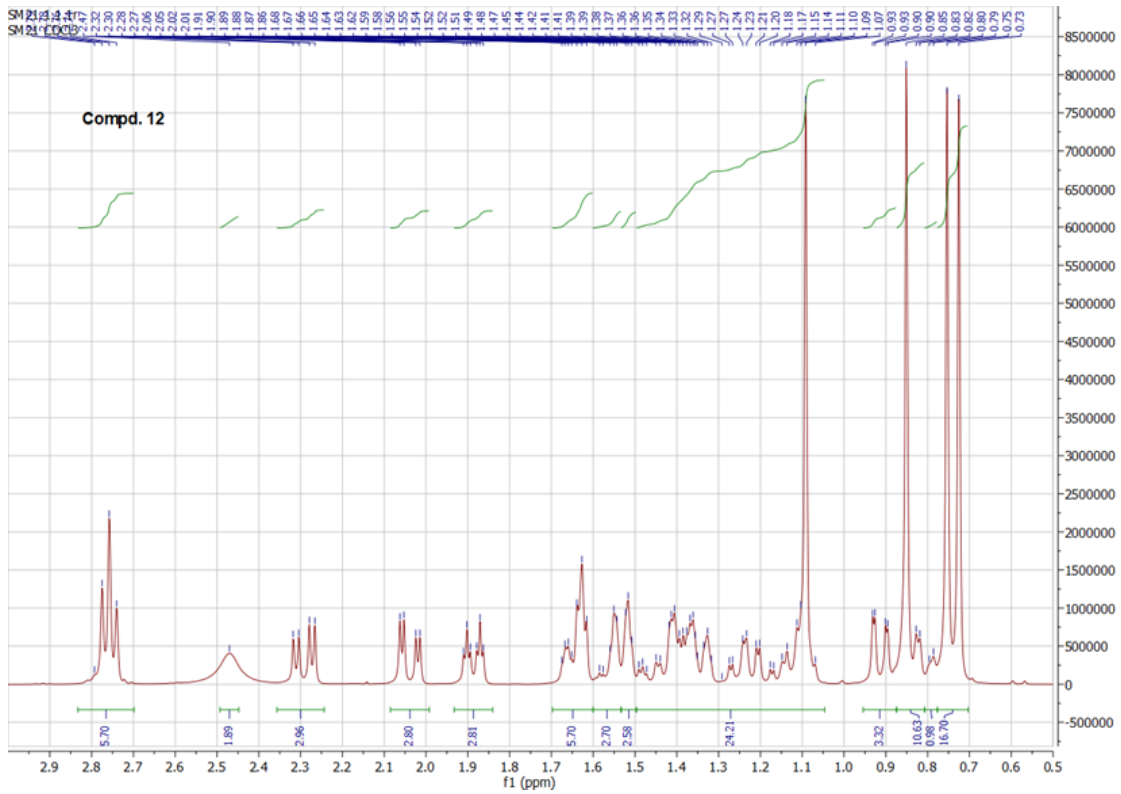



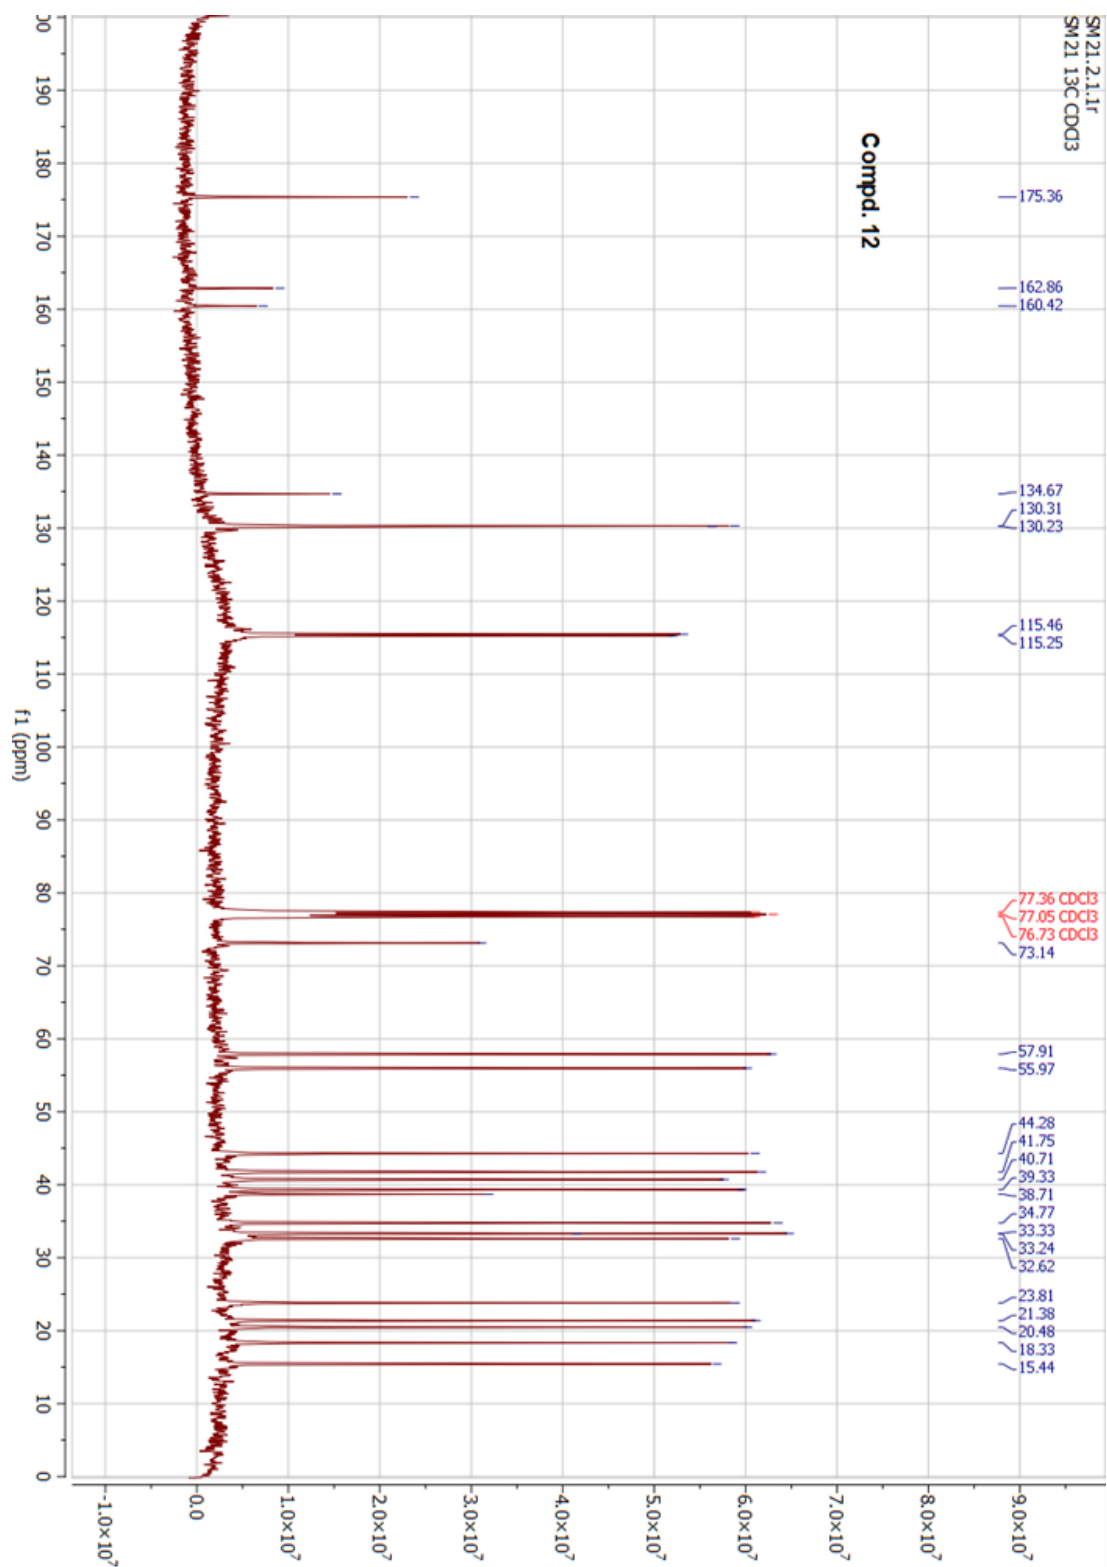

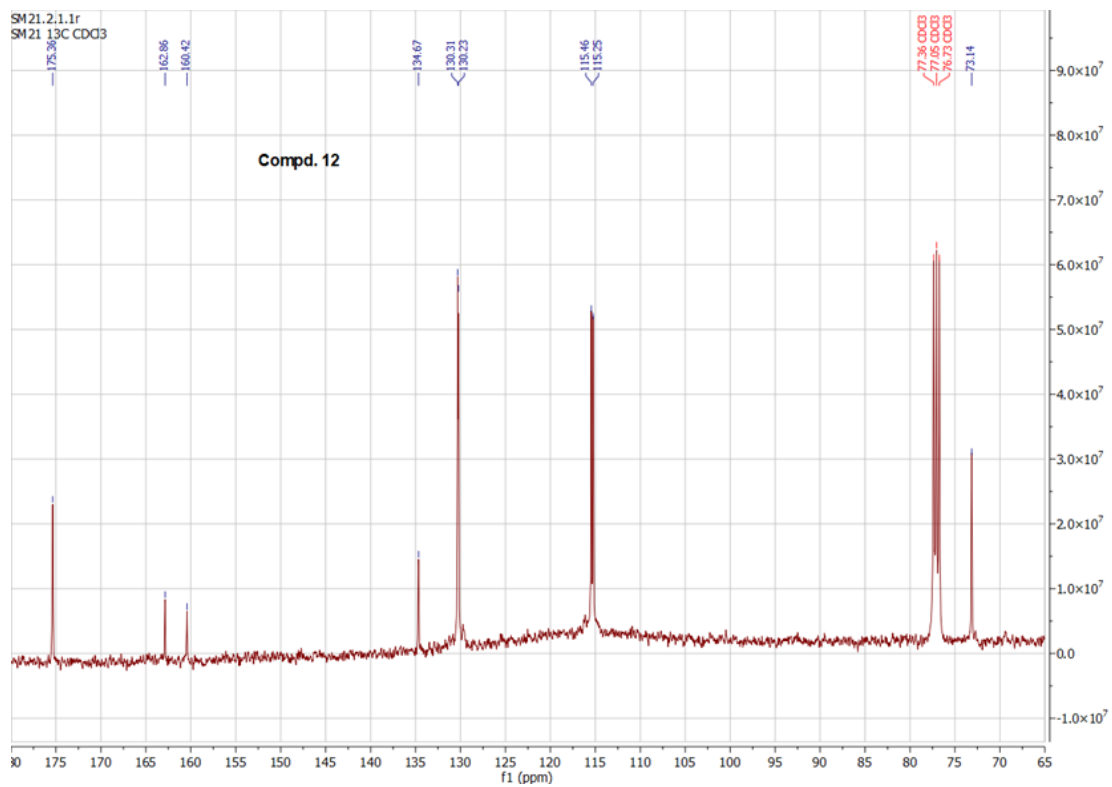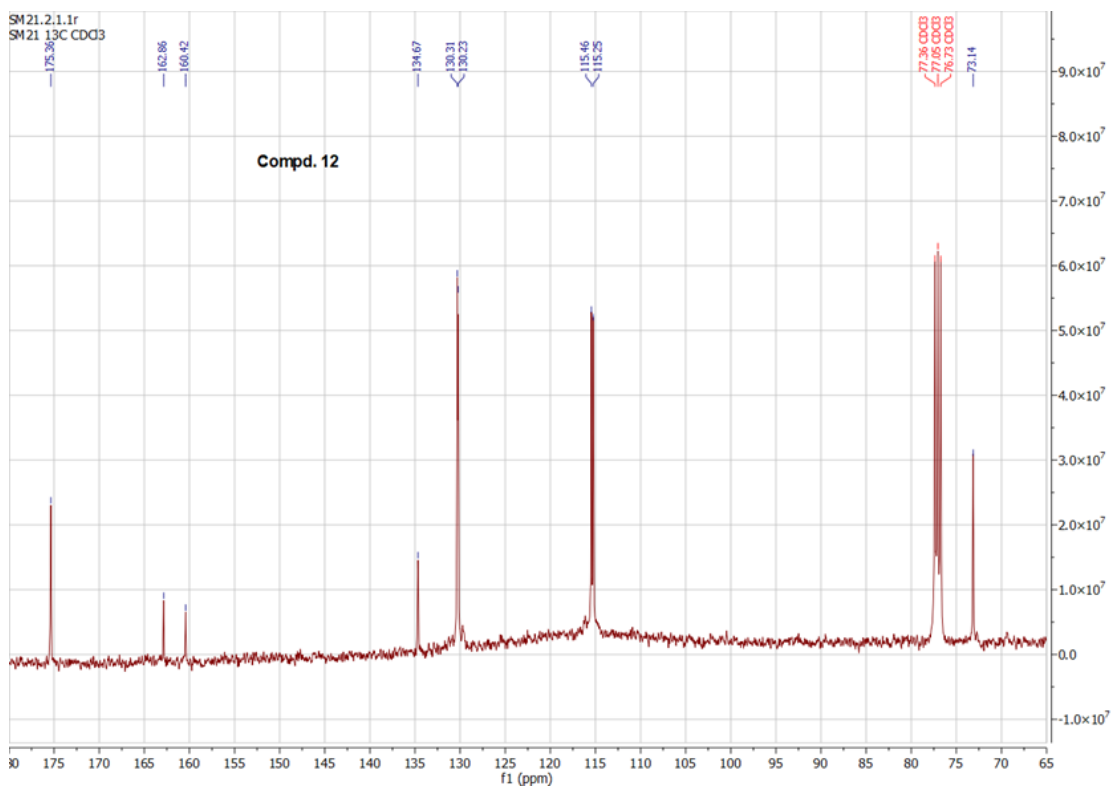

**Compd. 13**

Current Data Parameters  
 NAME: SMF7100 mg CCl3  
 PNO: 1  
 PNO: 1

F2 - Acquisition Parameters  
 Date: 20190508  
 Time: 10:58  
 INSTRUM: FTIR  
 PROBE: 5 mm 1H ZB86T  
 PULPROG: zgpg30  
 TD: 65536  
 SOLVENT: CCl3  
 NS: 32  
 DS: 0  
 SWH: 4194.63 Hz  
 FIDRES: 0.066005 Hz  
 AQ: 7.819411 sec  
 RG: 80.6  
 DW: 119.200 usec  
 DE: 6.00 usec  
 TE: 300.0 K  
 D1: 2.0000000 sec  
 ===== CHANNEL F1 =====  
 NU1: 1H  
 P1: 6.80 usec  
 PL1: -2.00 dB  
 SFO1: 300.1313508 MHz  
 F2 - Processing Parameters  
 SI: 32768  
 SF: 300.1300028 MHz  
 SCW: no  
 SGM: no  
 GB: 0.00 Hz  
 CB: 0  
 PC: 0.50

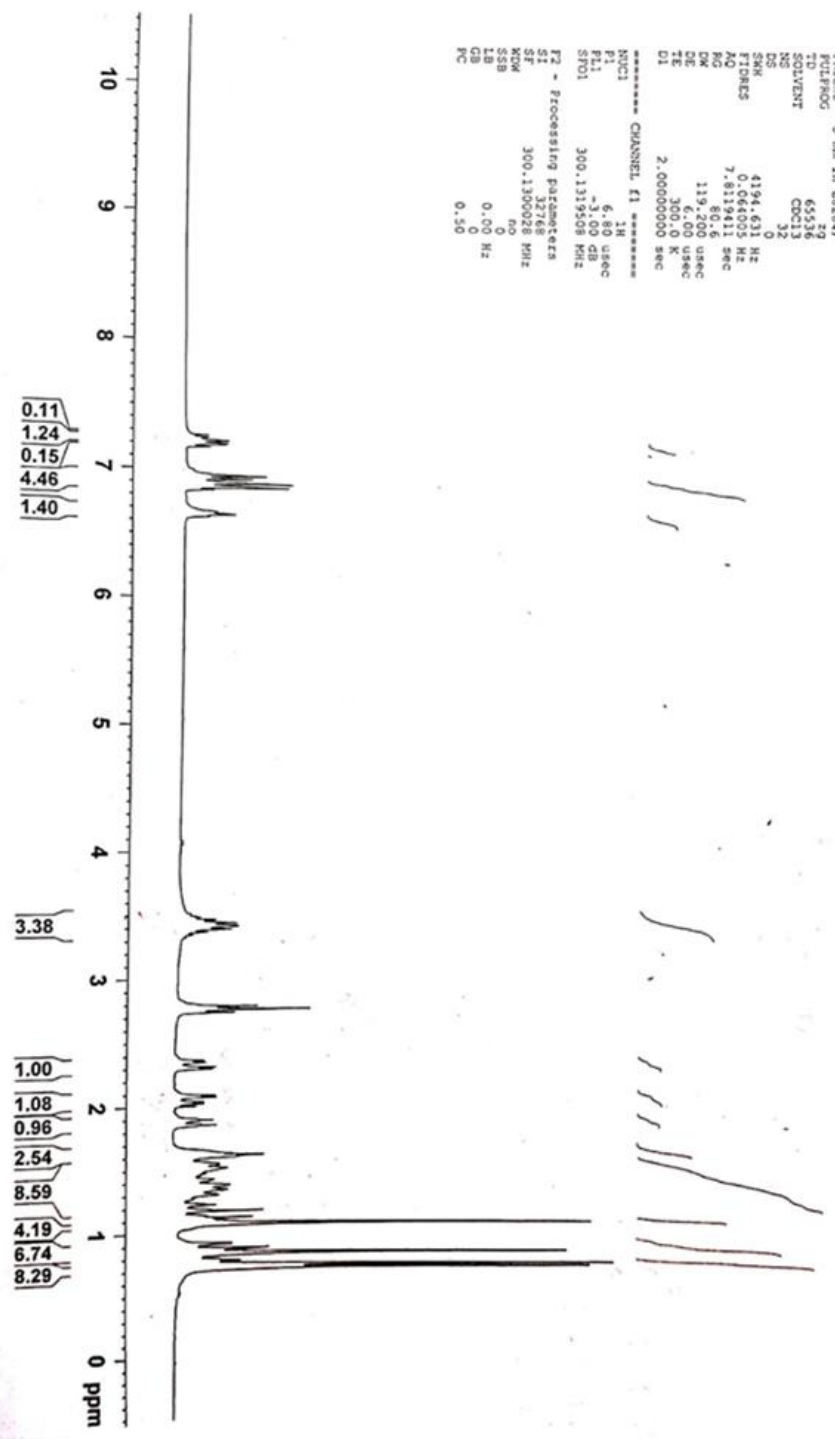

Scansionato con CamScanner

# Compd. 13

## Current Data Parameters

NAME 13C SMT (10023)  
 PROCNO 2

## F2 - Acquisition Parameters

Date\_ 201808  
 Time\_ 11:45  
 INSTRUM spect  
 PROBRD 5 mm HR 28284/  
 PULPROG zgpg30  
 F2FREQ 63.8  
 SOLVENT CDCl3  
 NS 512  
 DS 4  
 SWH 13985.613 Hz  
 FIDRES 0.274439 Hz  
 AQ 1.8219508 sec  
 RG 13843.2  
 DD 6.00 usec  
 DE 360.0 K  
 TE 300.2 K  
 D1 2.30000000 sec  
 D11 0.20000000 sec  
 D12 0.50000000 sec

## CHANNEL F1

NUC1 13C  
 P1 130 usec  
 PL1 -1.00 dB  
 SFO1 75.4732953 MHz

## CHANNEL F2

NAME maltolite  
 PROC2 60.00 usec  
 PL2 -3.00 dB  
 PL12 17.50 dB  
 PL13 17.50 dB  
 SFO2 300.1312005 MHz

## Processing parameters

SF 75.4671570 MHz  
 SI 32768  
 KW 0  
 SSB 0  
 CB 0  
 PC 1.40

Scansionato con CamScanner

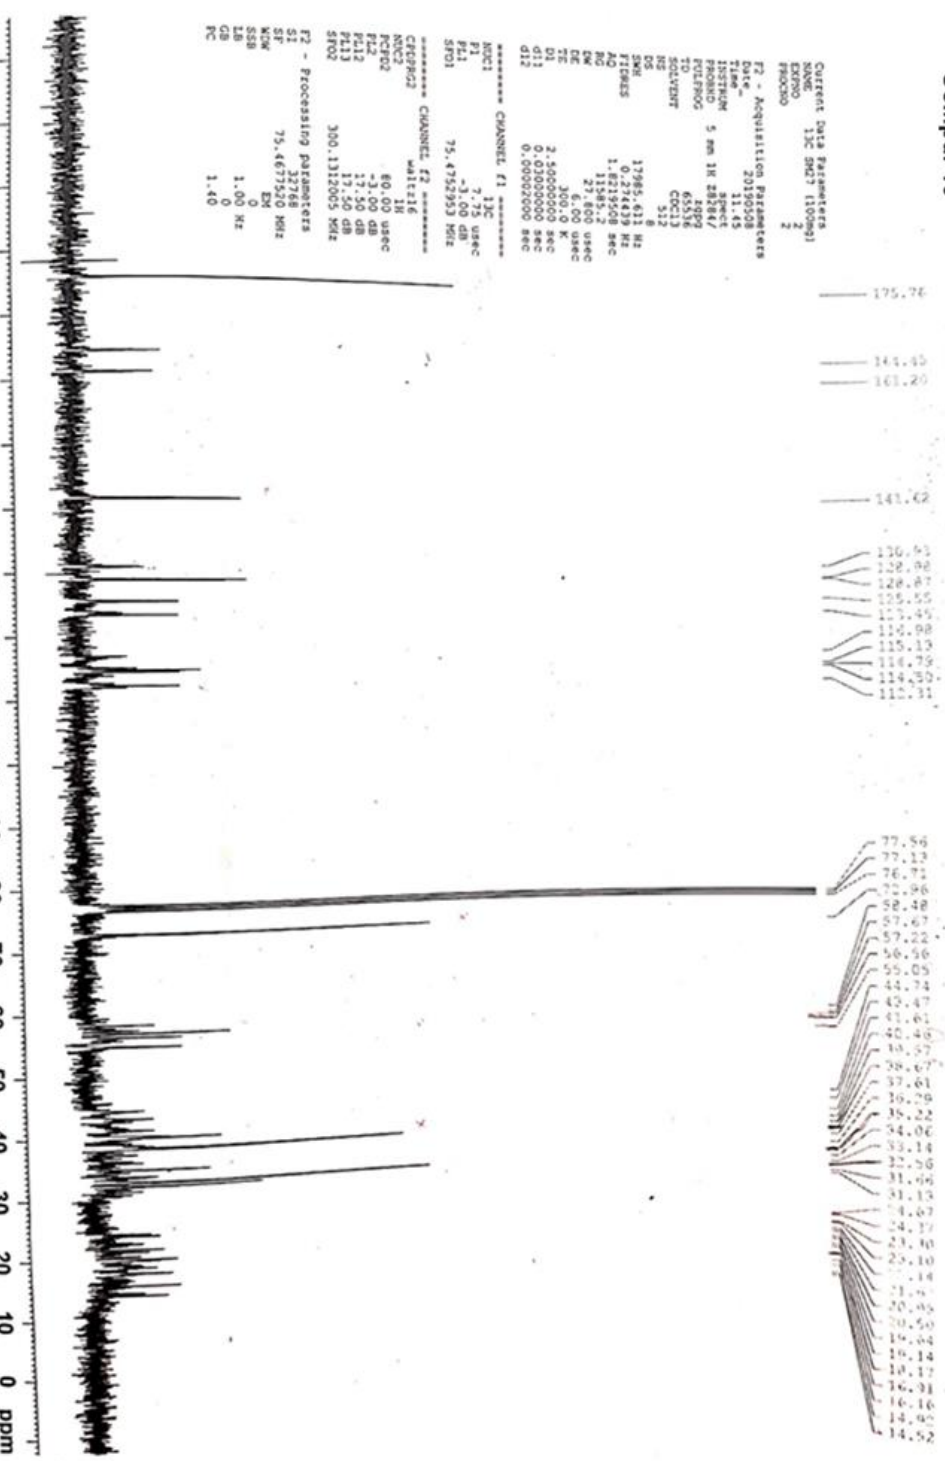

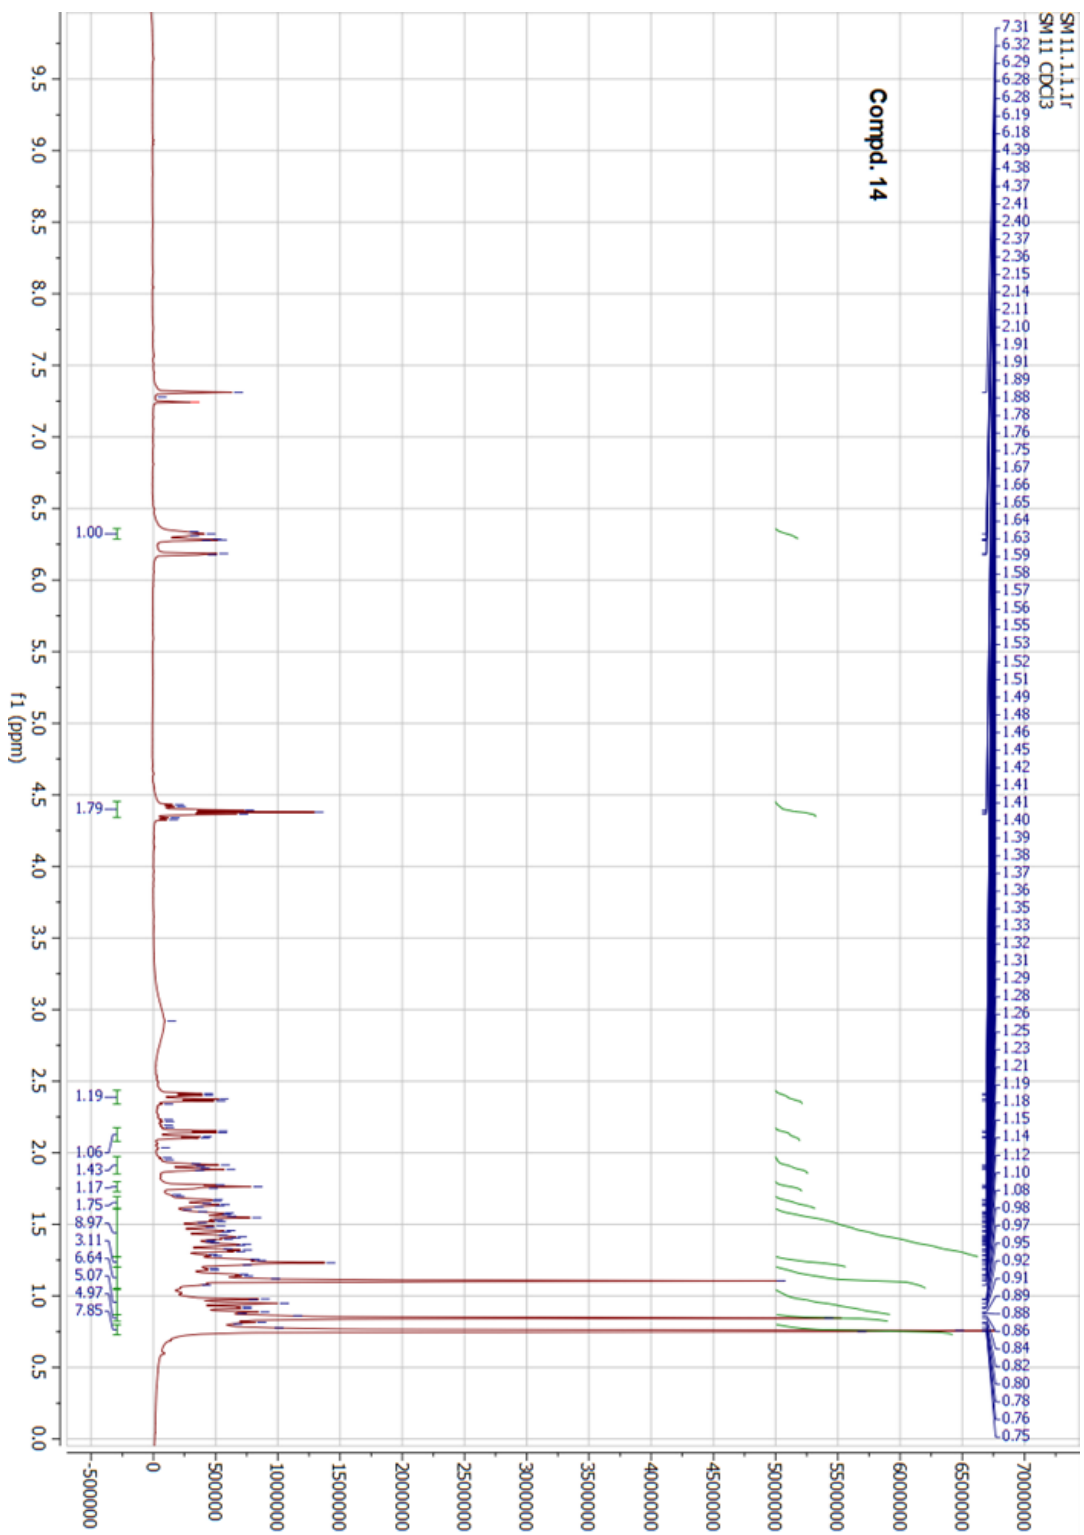

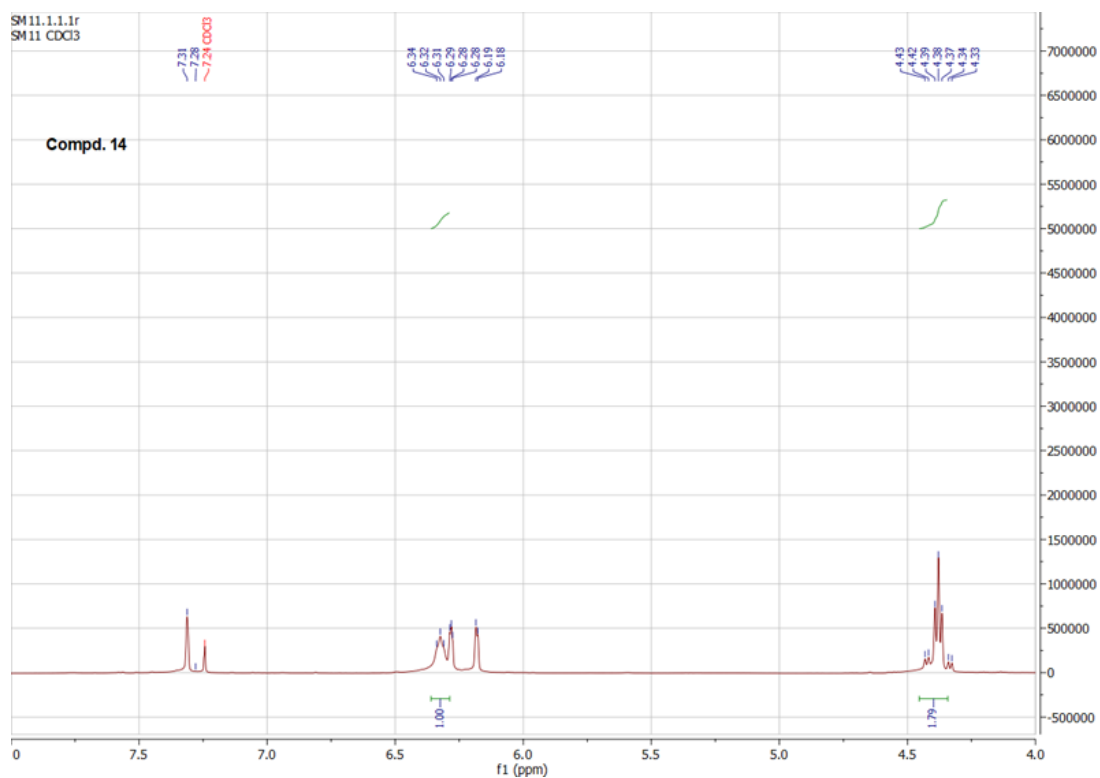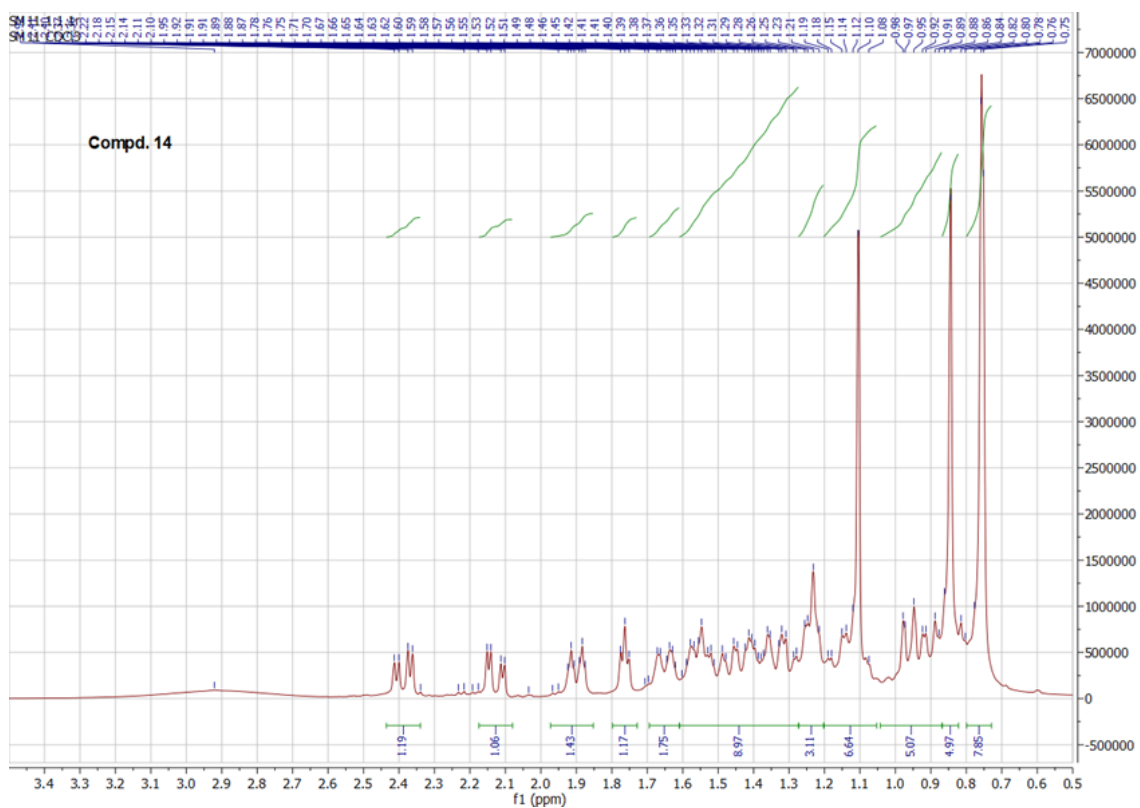

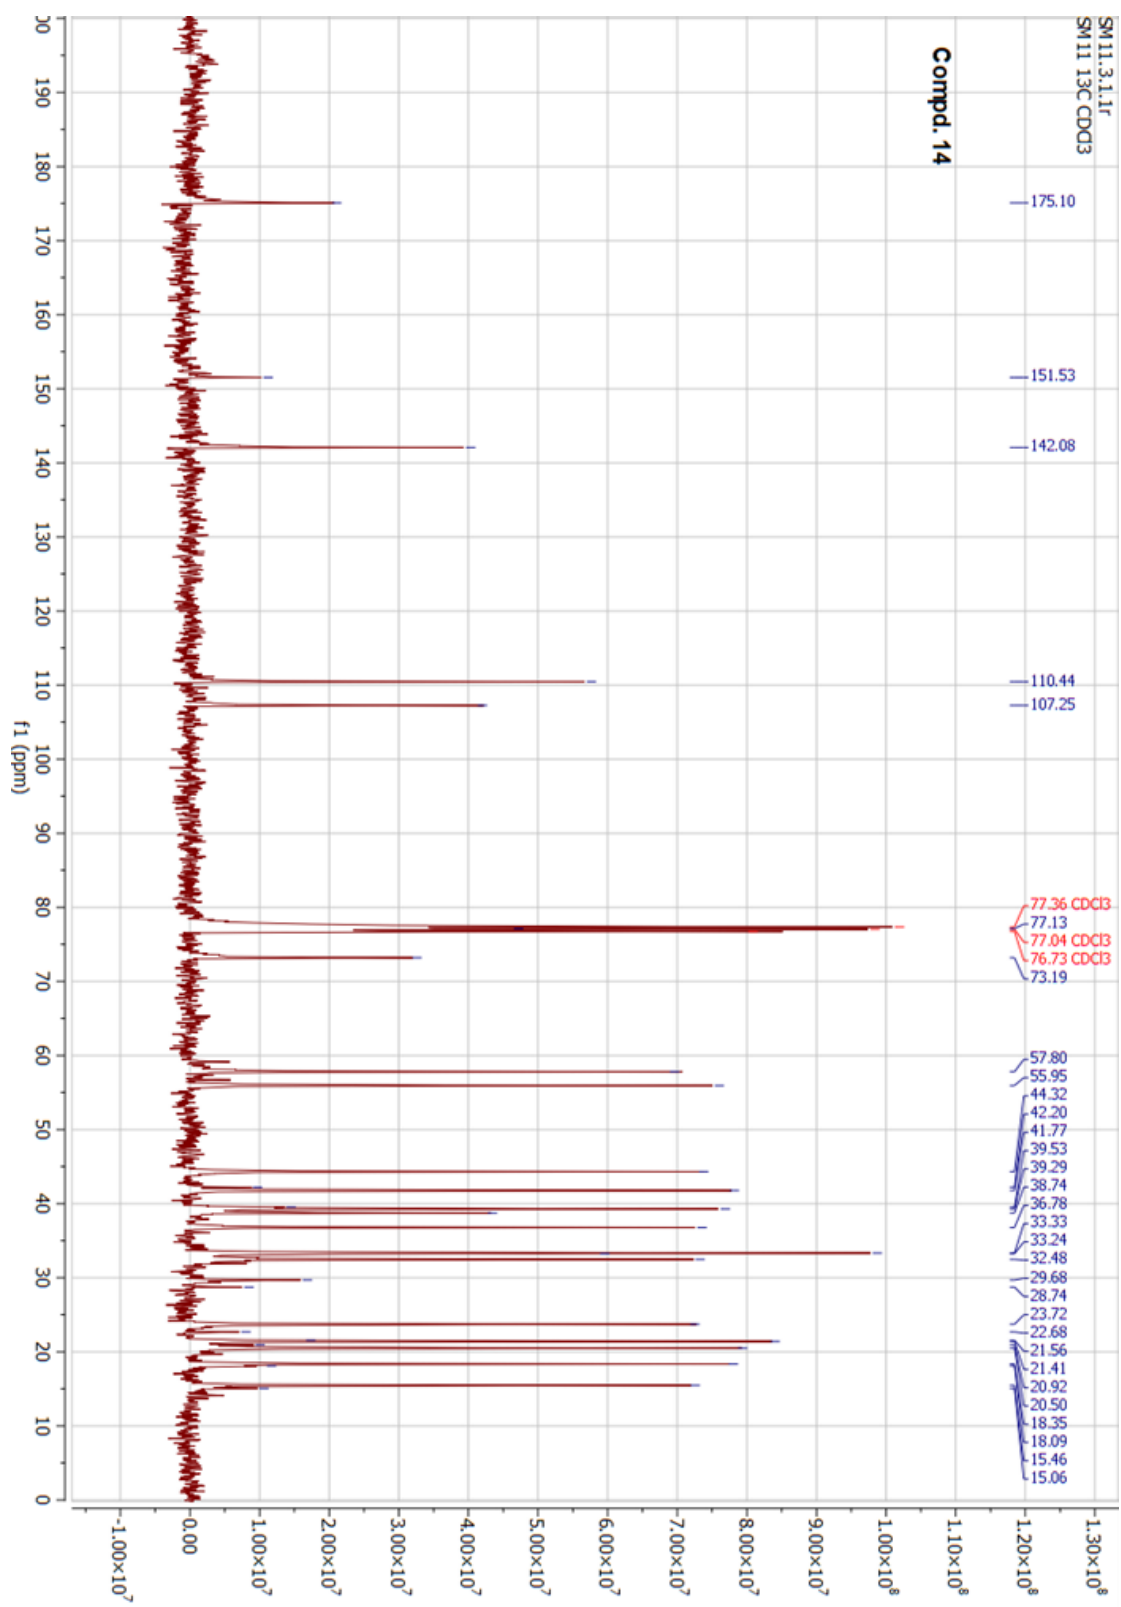

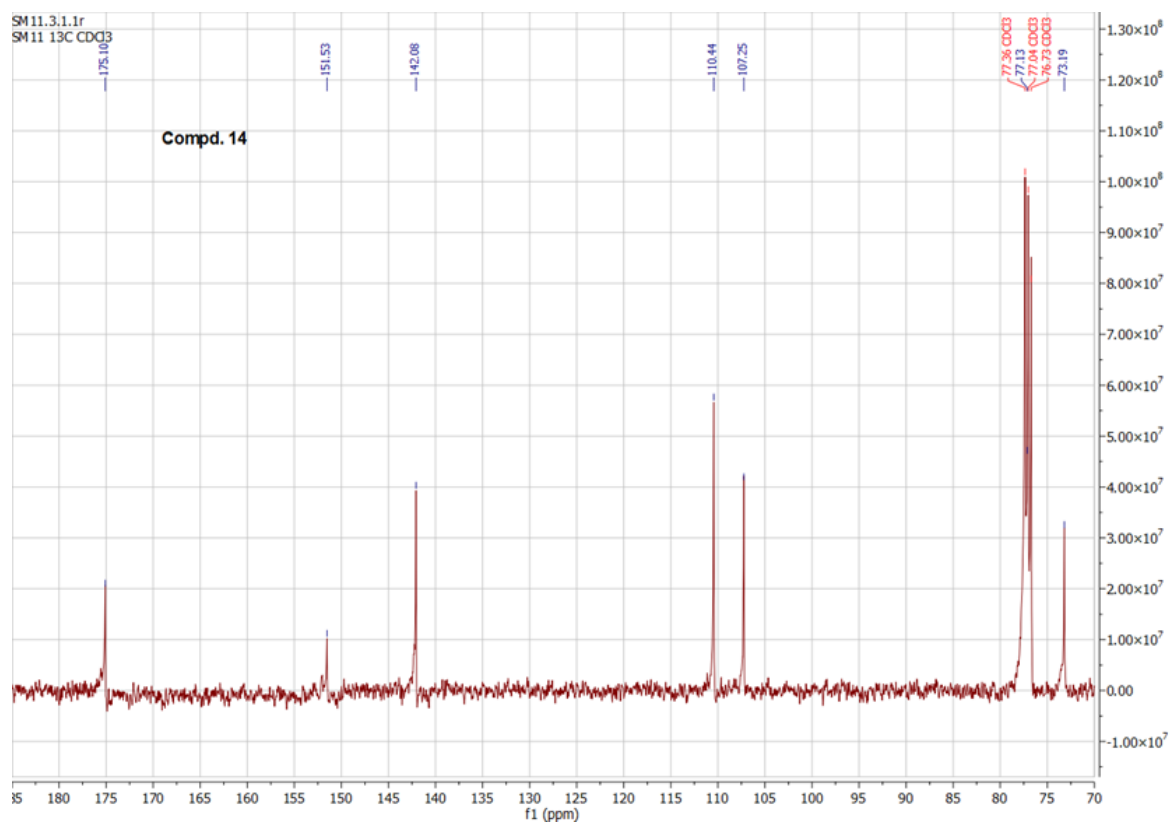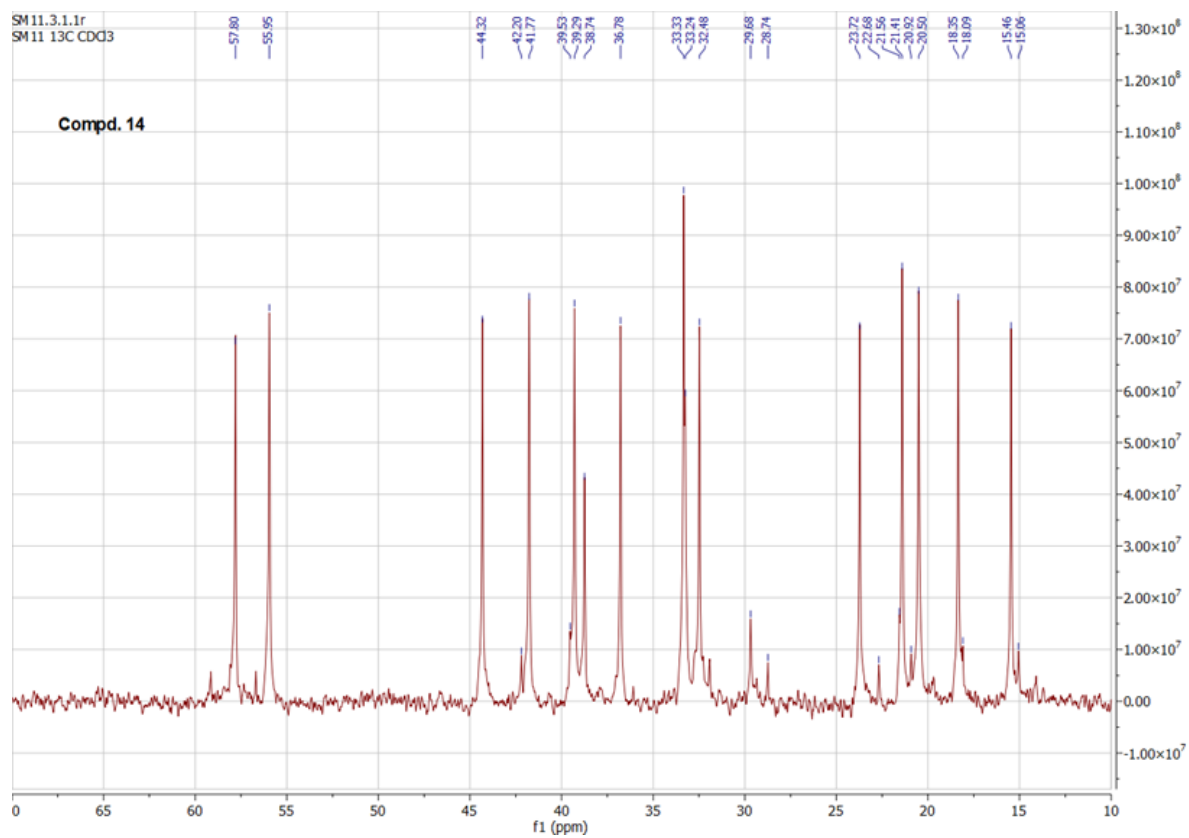



# Compd. 15

Current Data Parameters  
 NAME SN3 M4 50mg  
 EXPNO 1  
 PROCNO 1

F2 - Acquisition Parameters  
 Date\_ 20181207  
 Time\_ 9.30  
 INSTRUM spect  
 PROBRID 5 mm 1H 28284/  
 PULPROG zg  
 TD 65536  
 SOLVENT CDCl3  
 NS 32  
 DS 0  
 SMH 4194.631 Hz  
 FIDRES 0.064005 Hz  
 AQ 7.8119411 sec  
 RG 49.3  
 DM 119.200 usec  
 DE 6.00 usec  
 TE 300.0 K  
 D1 2.00000000 sec

\*\*\*\*\* CHANNEL f1 \*\*\*\*\*  
 NUCL 1H  
 P1 6.80 usec  
 PL1 -3.00 dB  
 SFO1 300.1319508 MHz  
 F2 - Processing parameters  
 SI 32768  
 SF 300.1300065 MHz  
 MDM no  
 SSB 0  
 LB 0.00 Hz  
 GB 0  
 PC 0.50

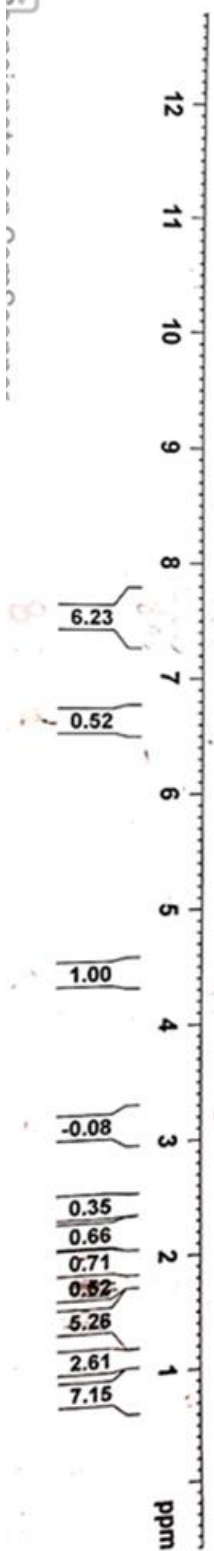

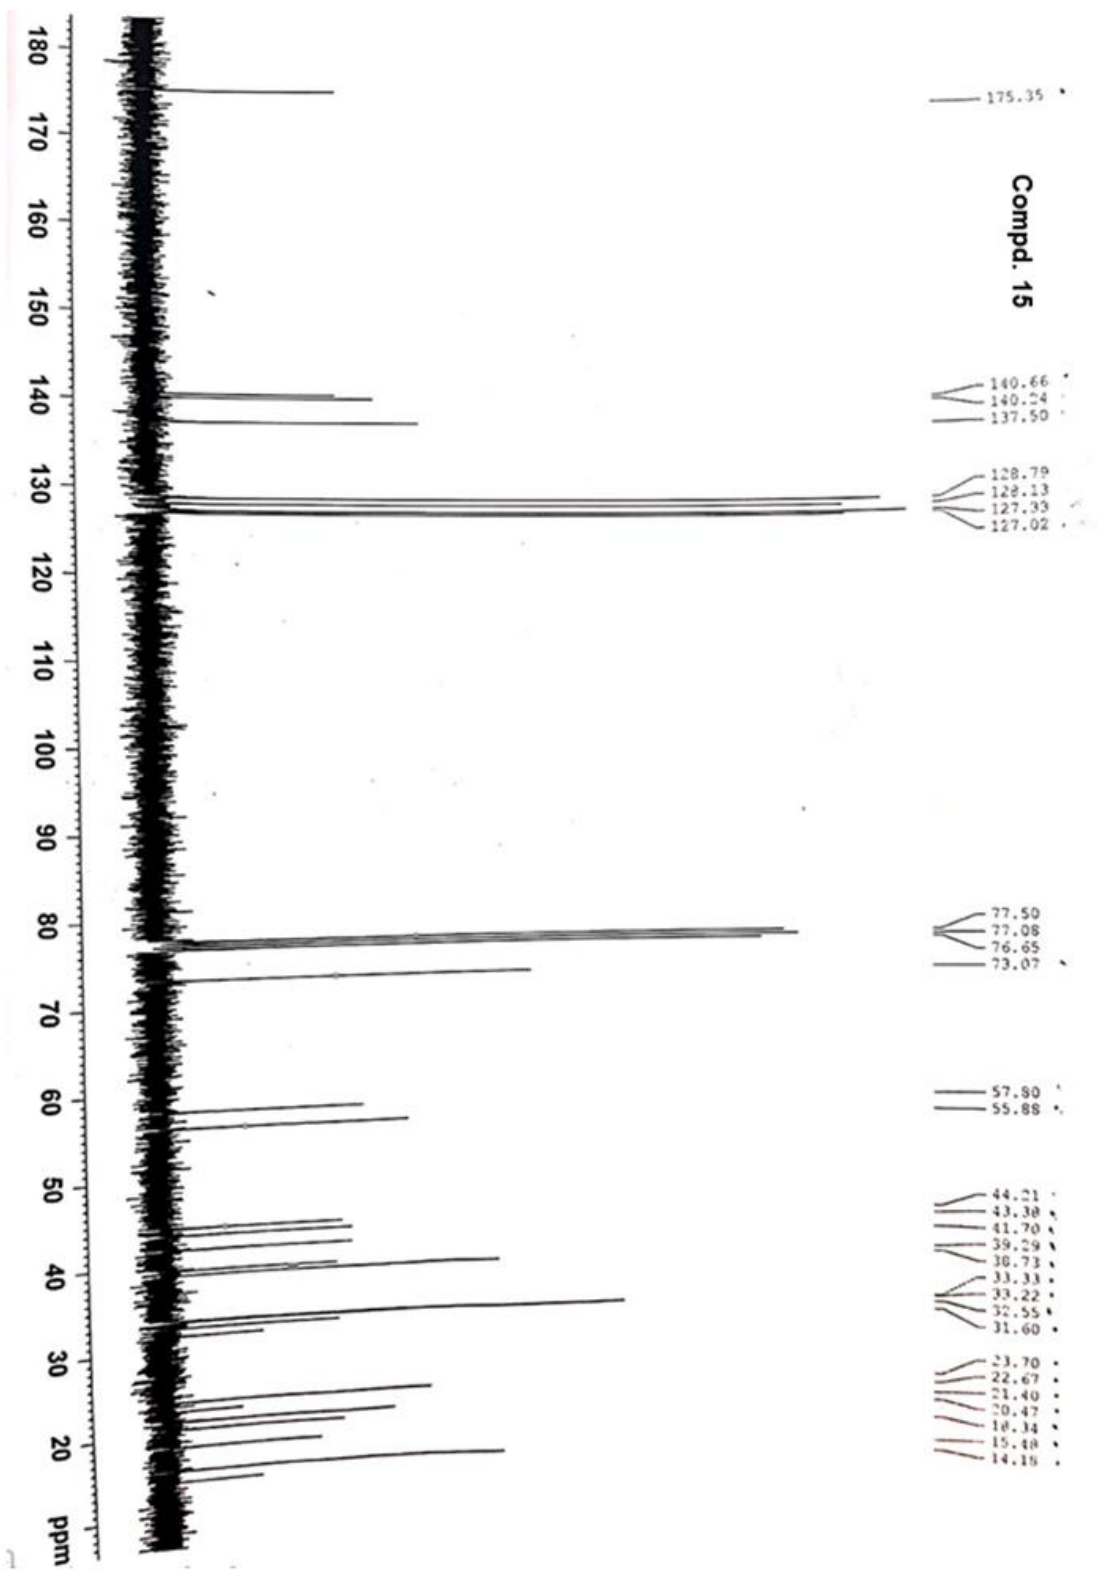

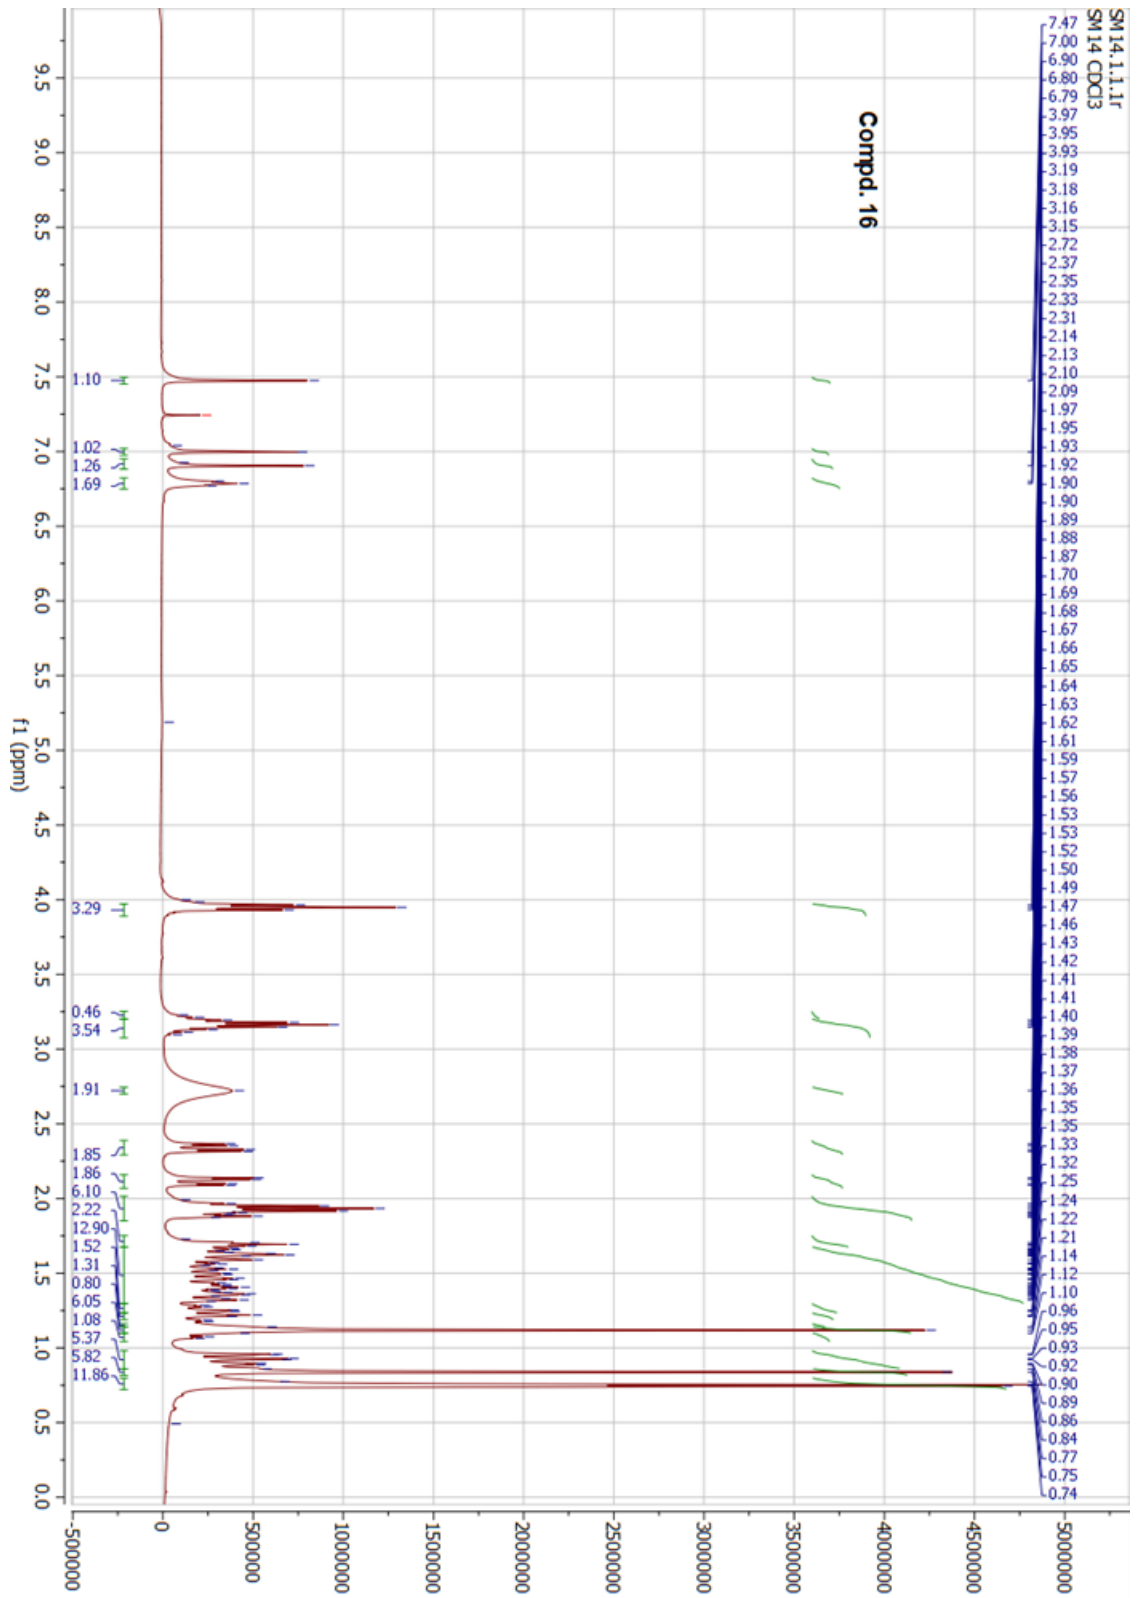

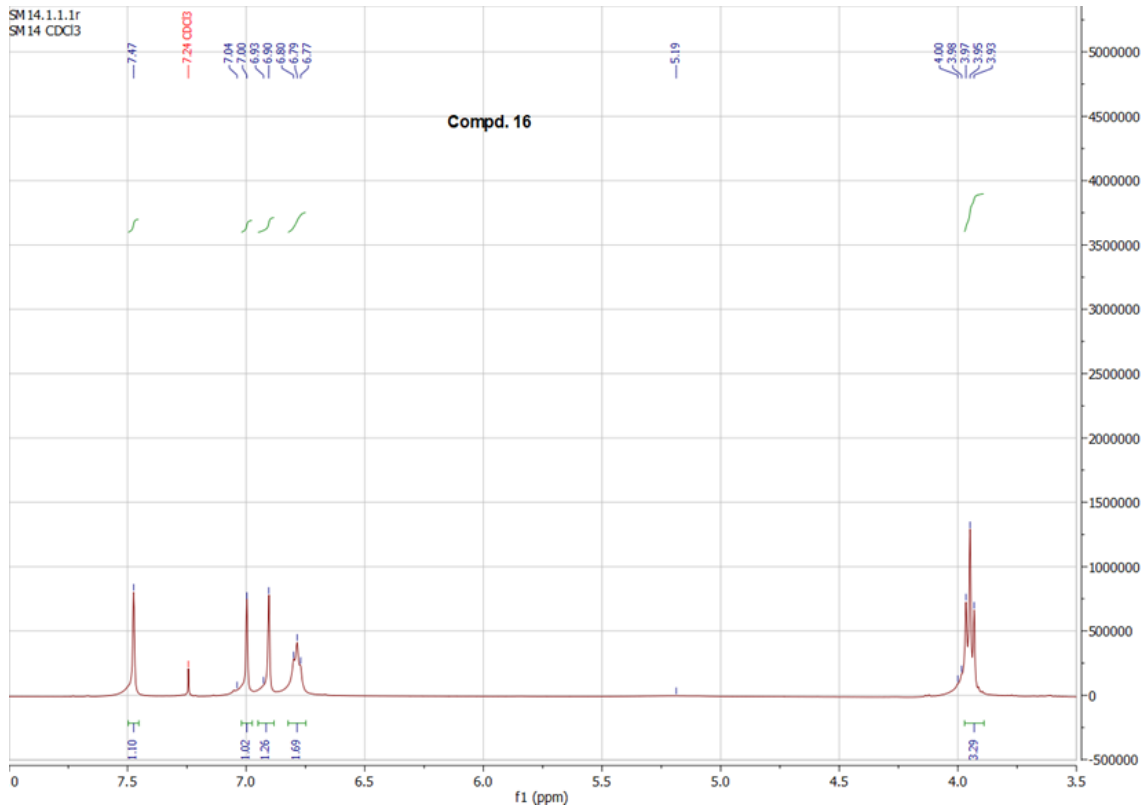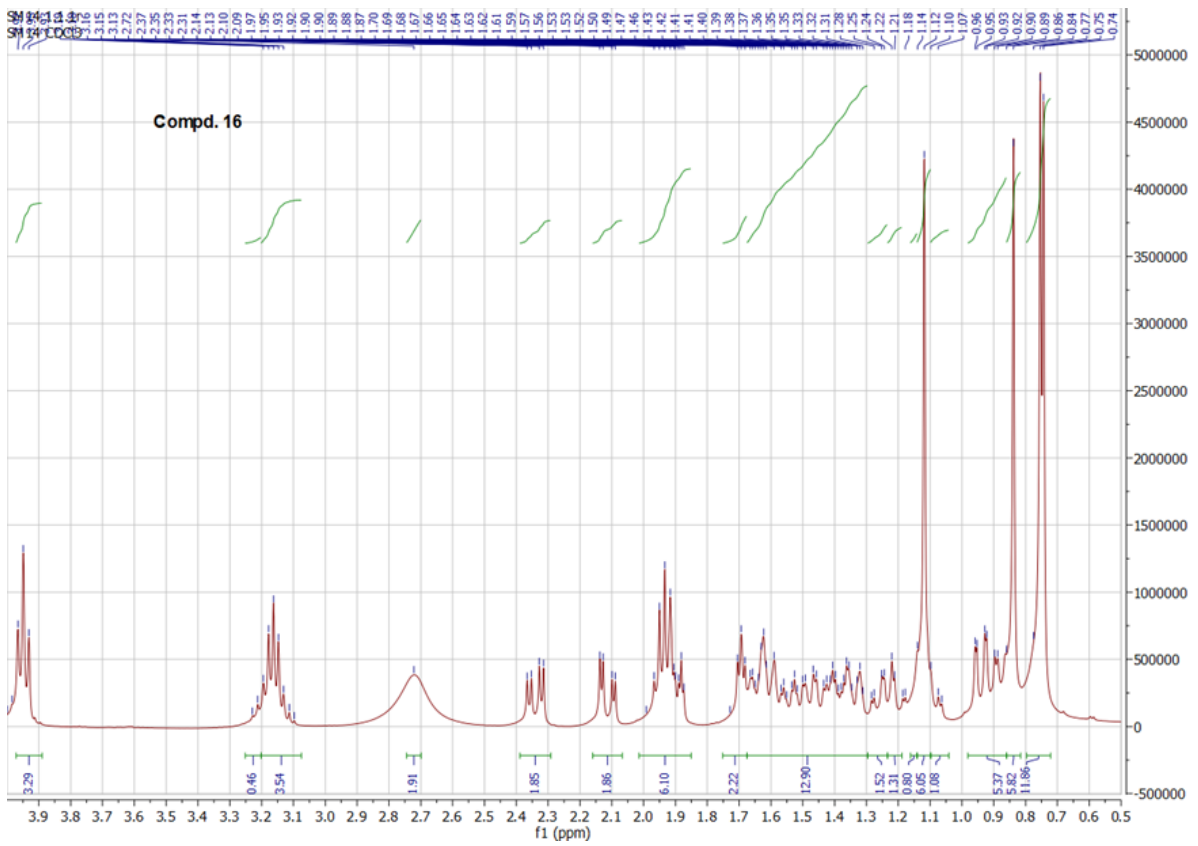

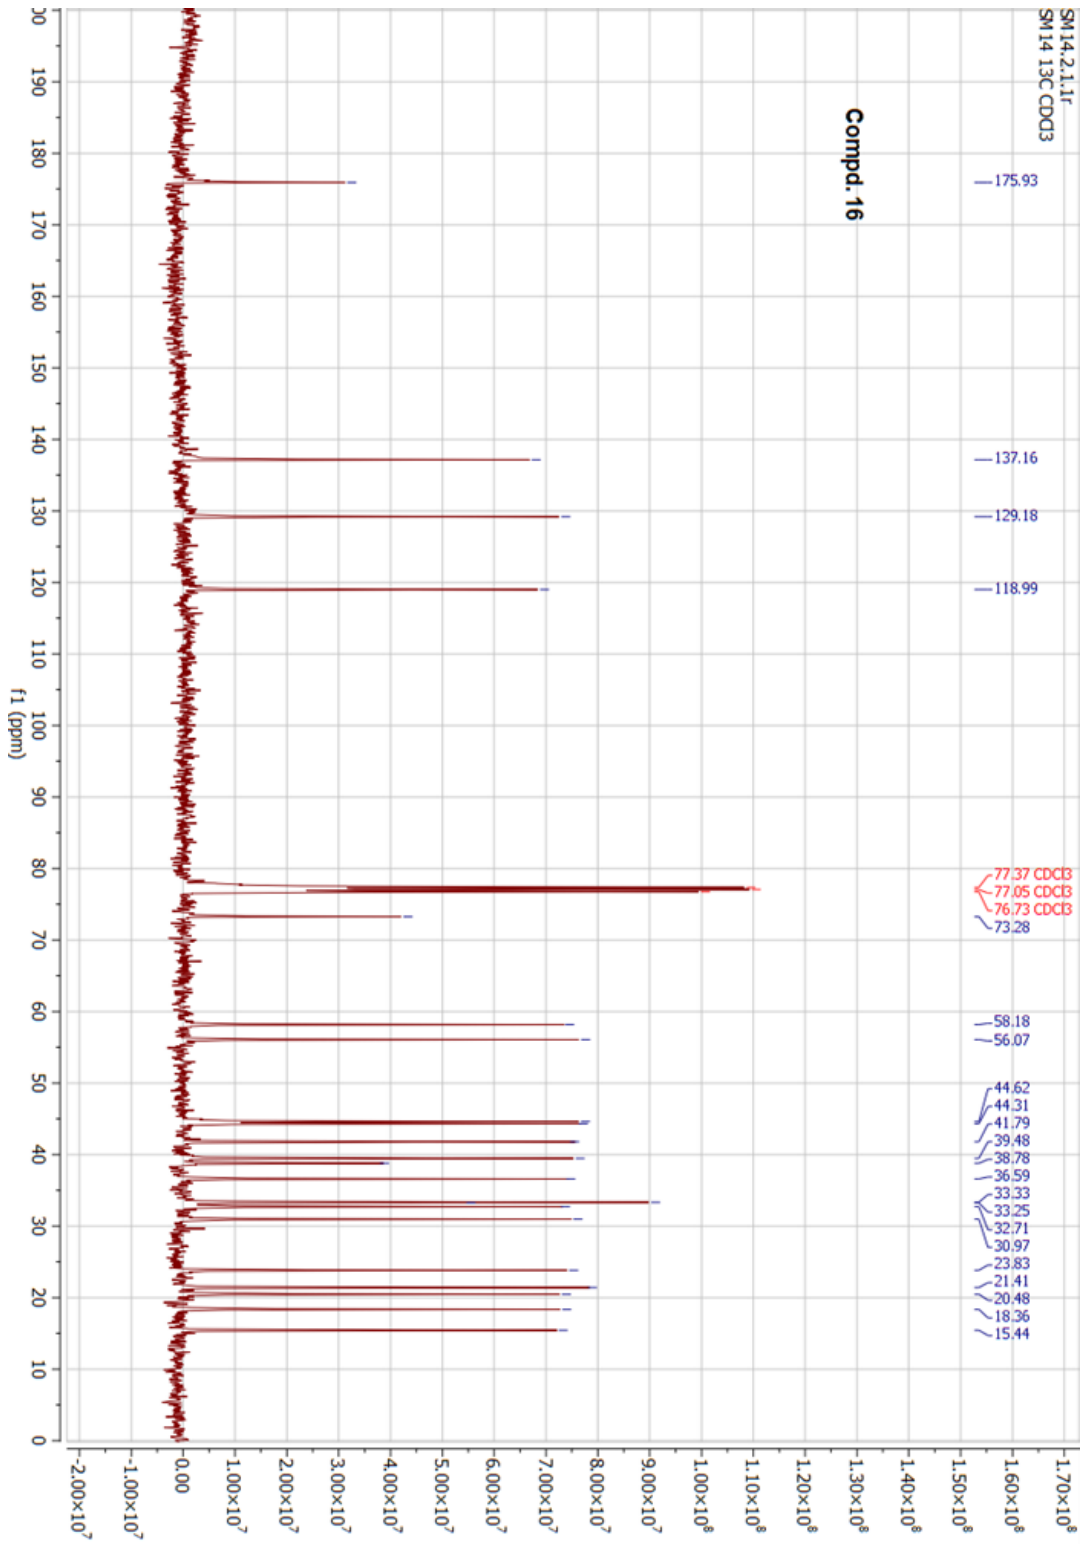

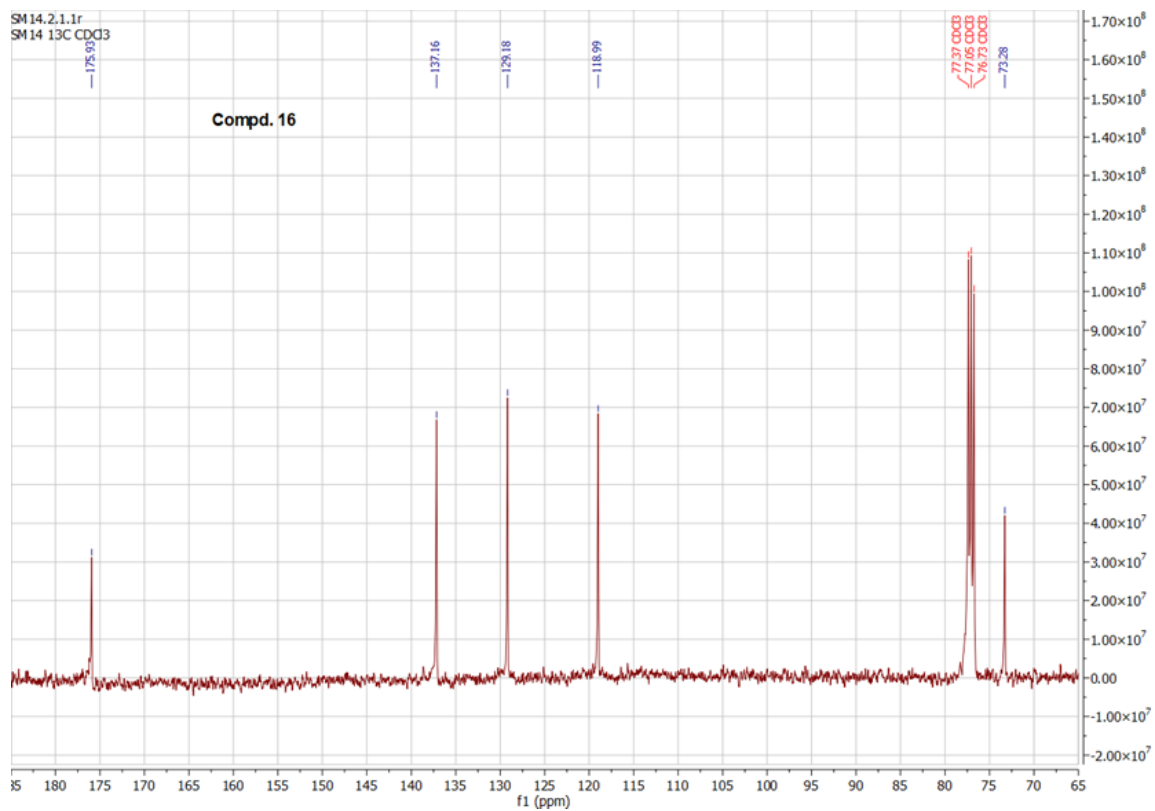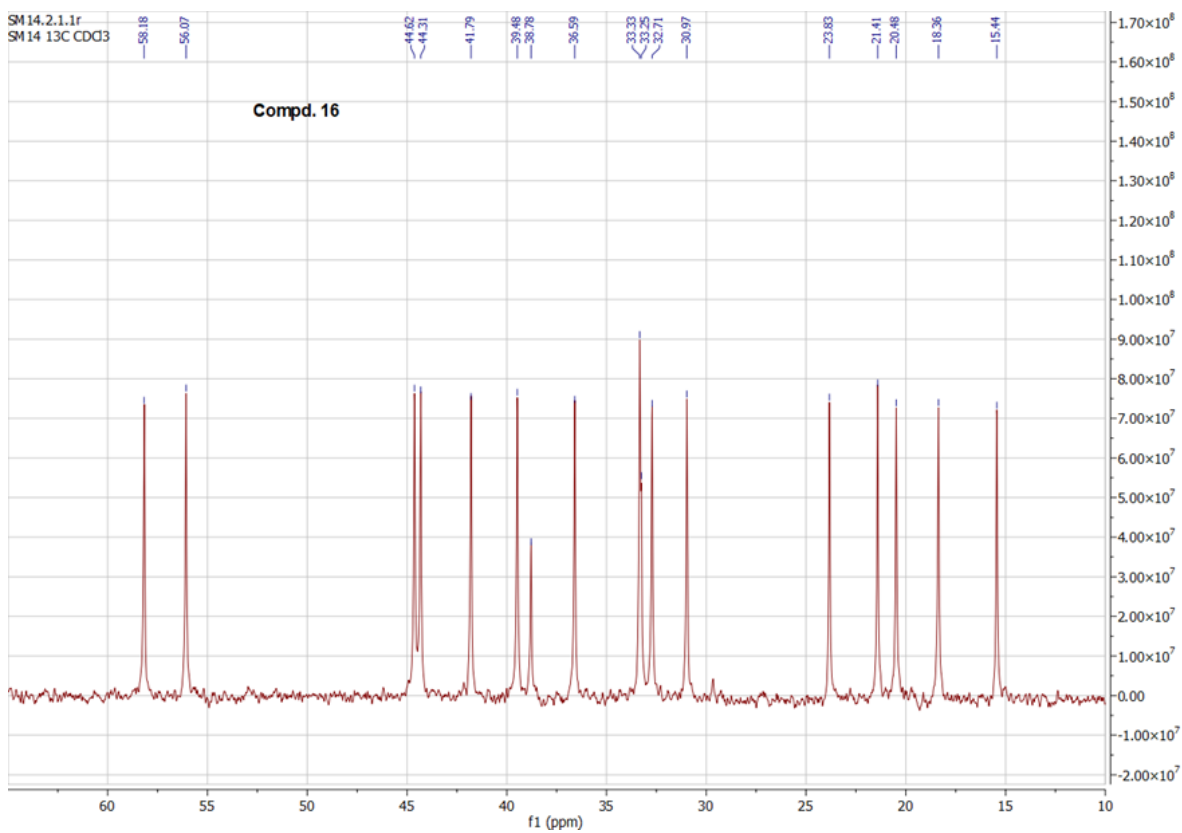

**Compd. 18**

Current Data Parameters  
 NAME SMJ1 60 mg CDC13  
 EXPNO 1  
 PROCNO 1

F2 - Acquisition Parameters  
 Date\_ 20190628  
 Time\_ 11.12  
 INSTRUM spect  
 PROBHD 5 mm 1H z8284/  
 PULPROG zg  
 TD 65536  
 SOLVENT CDC13  
 NS 32  
 DS 0  
 SSWH 4194.631 Hz  
 FIDRES 0.064005 Hz  
 AQ 7.8119411 sec  
 RG 16  
 DW 119.200 usec  
 DE 6.00 usec  
 TE 300.0 K  
 D1 2.00000000 sec

\*\*\*\*\* CHANNEL f1 \*\*\*\*\*  
 NUCL 1H  
 P1 6.80 usec  
 PL1 -3.00 dB  
 SFO1 300.1319508 MHz

F2 - Processing parameters  
 SI 32768  
 SF 300.1300174 MHz  
 MDW no  
 SSB 0  
 LB 0.00 Hz  
 GB 0  
 PC 0.50

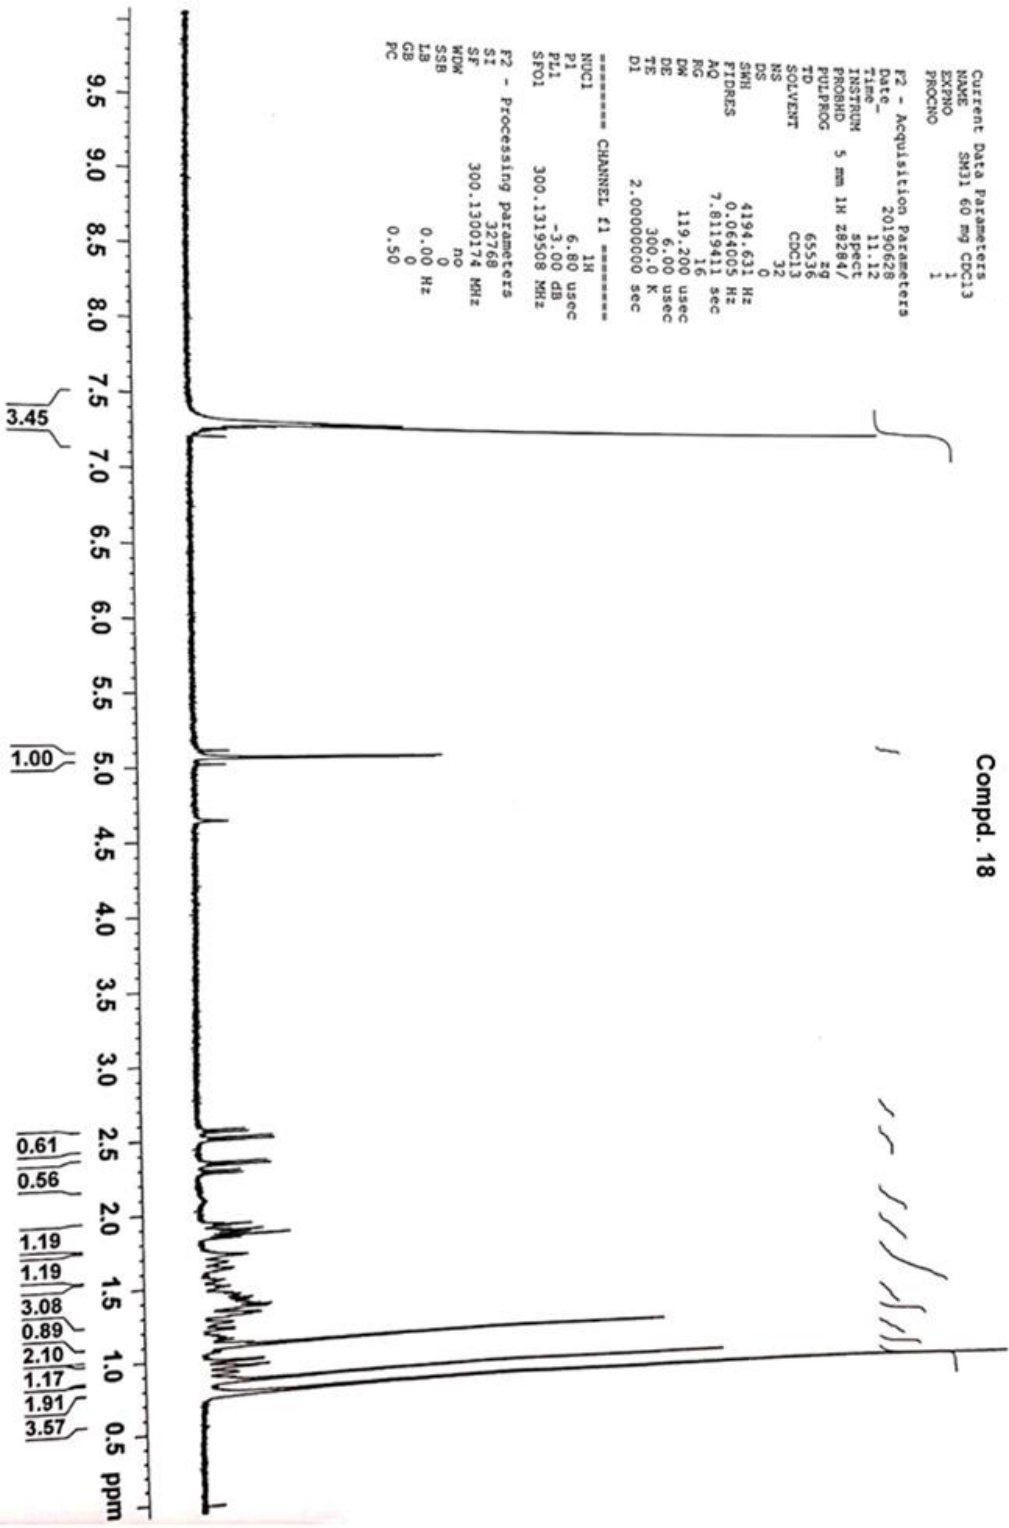

Current Data Parameters  
 Name 13C SM31 (60mg)  
 RunNO 1  
 ProcNO 2

F2 - Acquisition Parameters  
 Date\_ 20190709  
 Time 10.28

INSTRUM spect  
 PROBD 5 mm 1H 28284/  
 PULPROG zgpg30  
 TD 65536  
 FIDRES 0.274439 Hz  
 AQ 1.8219508 sec  
 RG 11585.2  
 DW 27.800 usec  
 DE 6.00 usec  
 TE 300.0 K  
 D11 2.5000000 sec  
 D12 0.030000000 sec  
 D12 0.00002000 sec

===== CHANNEL f1 =====  
 NUCL1 13C  
 P1 7.75 usec  
 PL1 -3.00 dB  
 SFO1 75.4752953 MHz

===== CHANNEL f2 =====  
 CDEPRG2 waltz16  
 NUCL2 1H  
 PCPD2 80.00 usec  
 PL2 -3.00 dB  
 PL12 17.50 dB  
 PL13 17.50 dB  
 SFO2 300.1312085 MHz

F2 - Processing Parameters  
 SI 32768  
 SF 75.4677520 MHz  
 KCM EM  
 SSB 0  
 LB 1.00 Hz  
 GB 0  
 PC 1.40

Compd. 18

127.10  
127.15  
127.40  
127.20  
129.34  
129.55  
136.00

77.49  
77.07  
76.64  
75.10  
69.58  
64.99  
64.29  
63.86  
61.71  
61.85  
61.57  
61.86  
61.07  
61.62  
58.49  
57.49  
54.10  
53.17  
52.54  
51.56  
51.13  
50.55  
50.12  
49.73  
49.41  
48.71  
48.27  
41.17  
40.61  
38.75  
39.20  
36.50  
36.06  
36.72  
36.16  
34.51

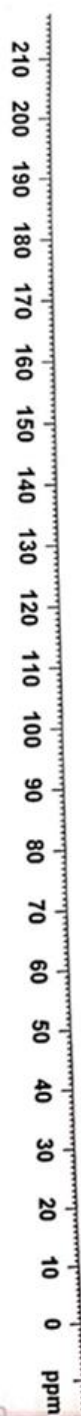



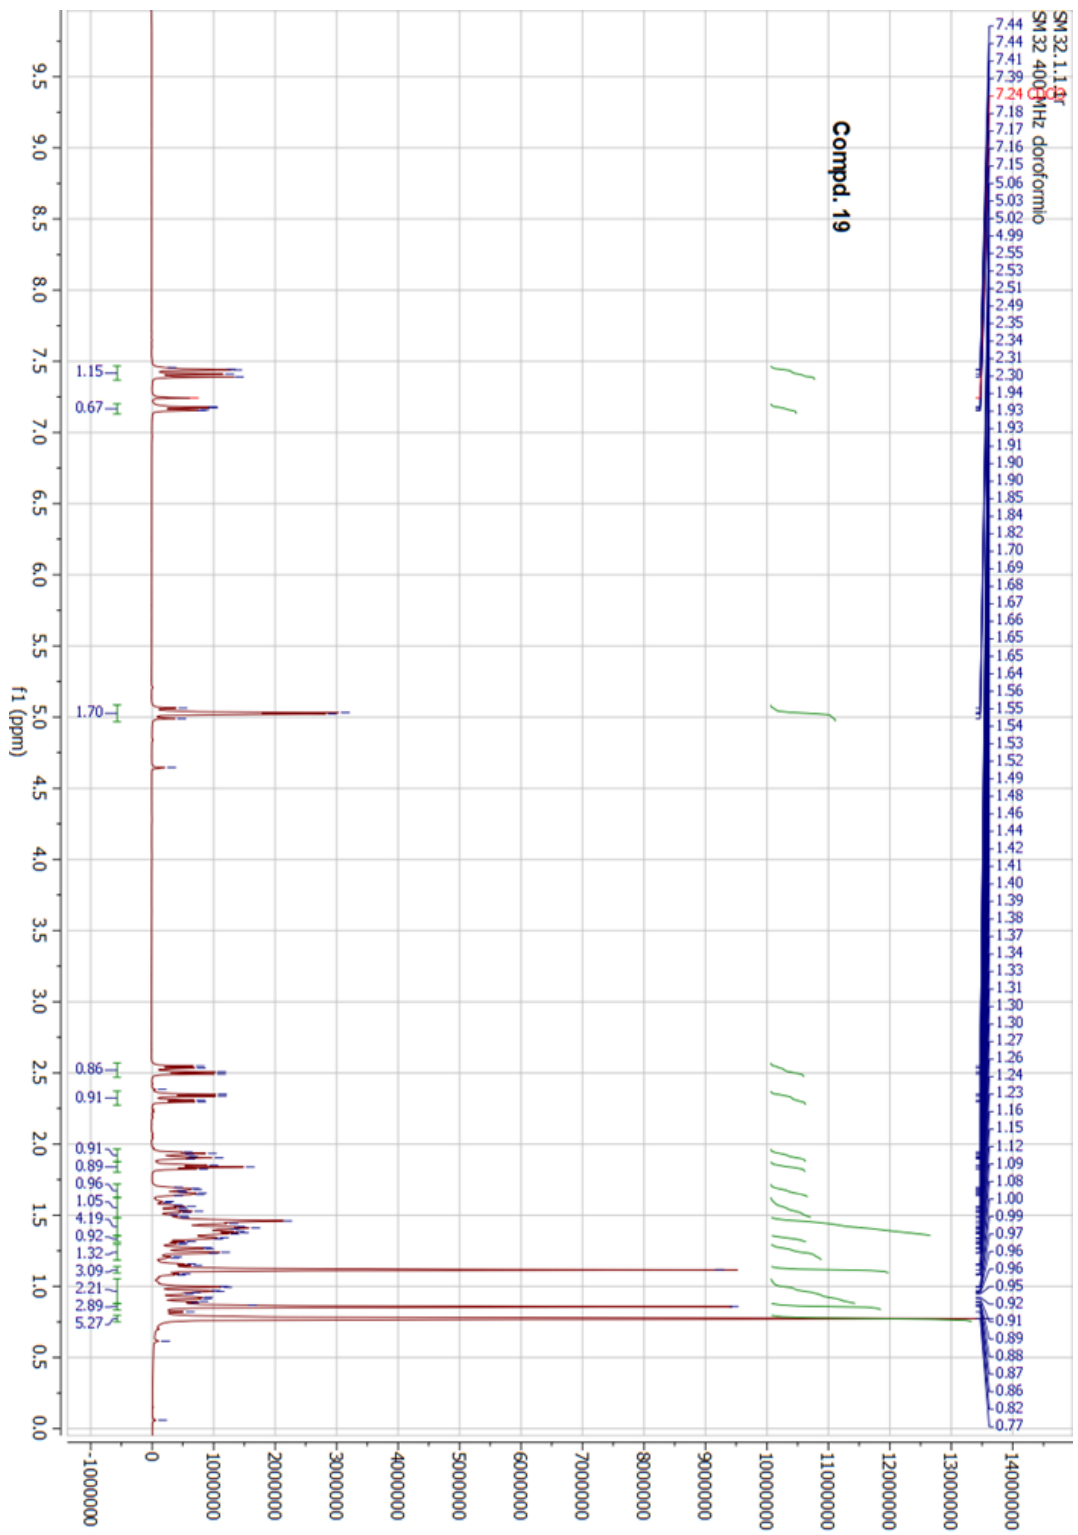

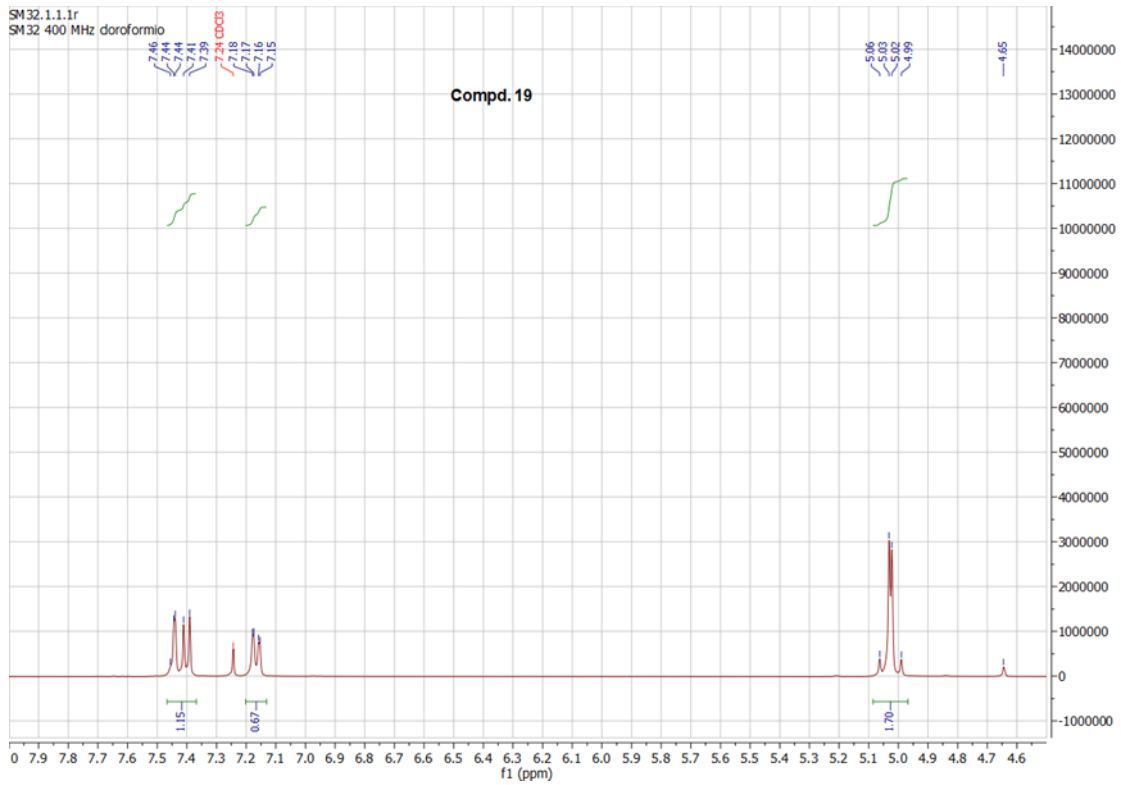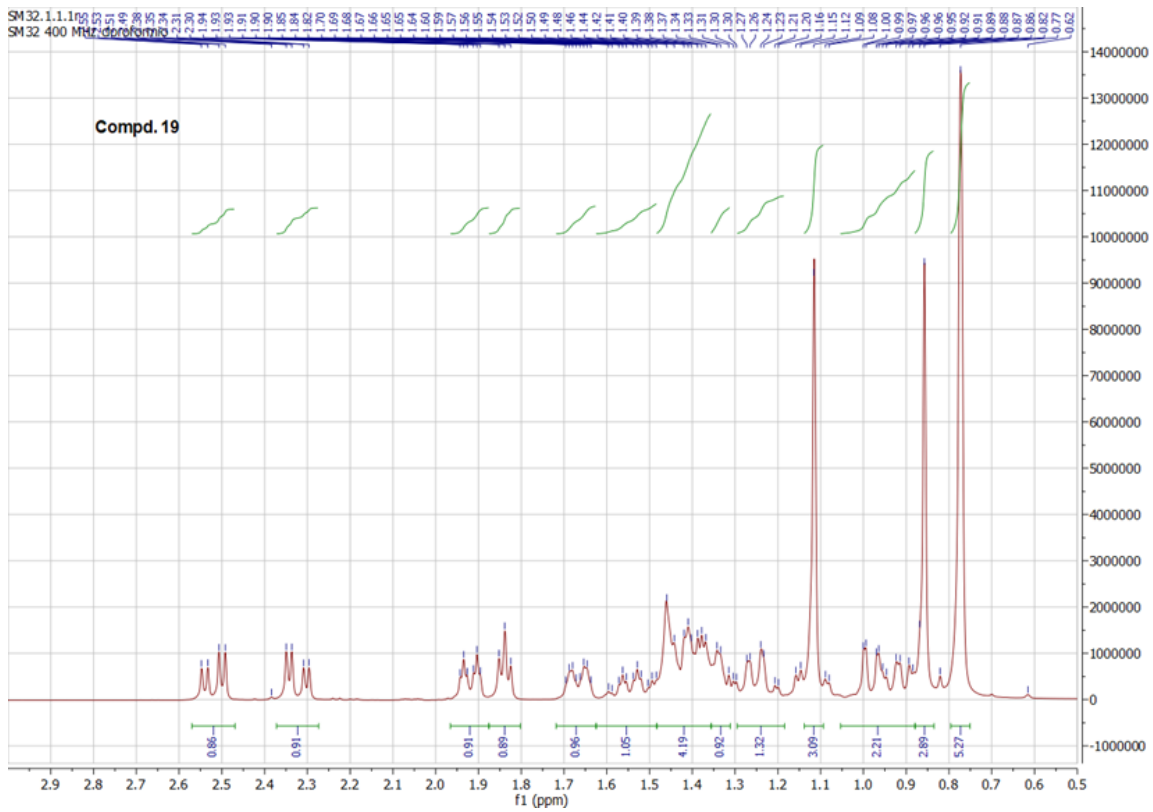

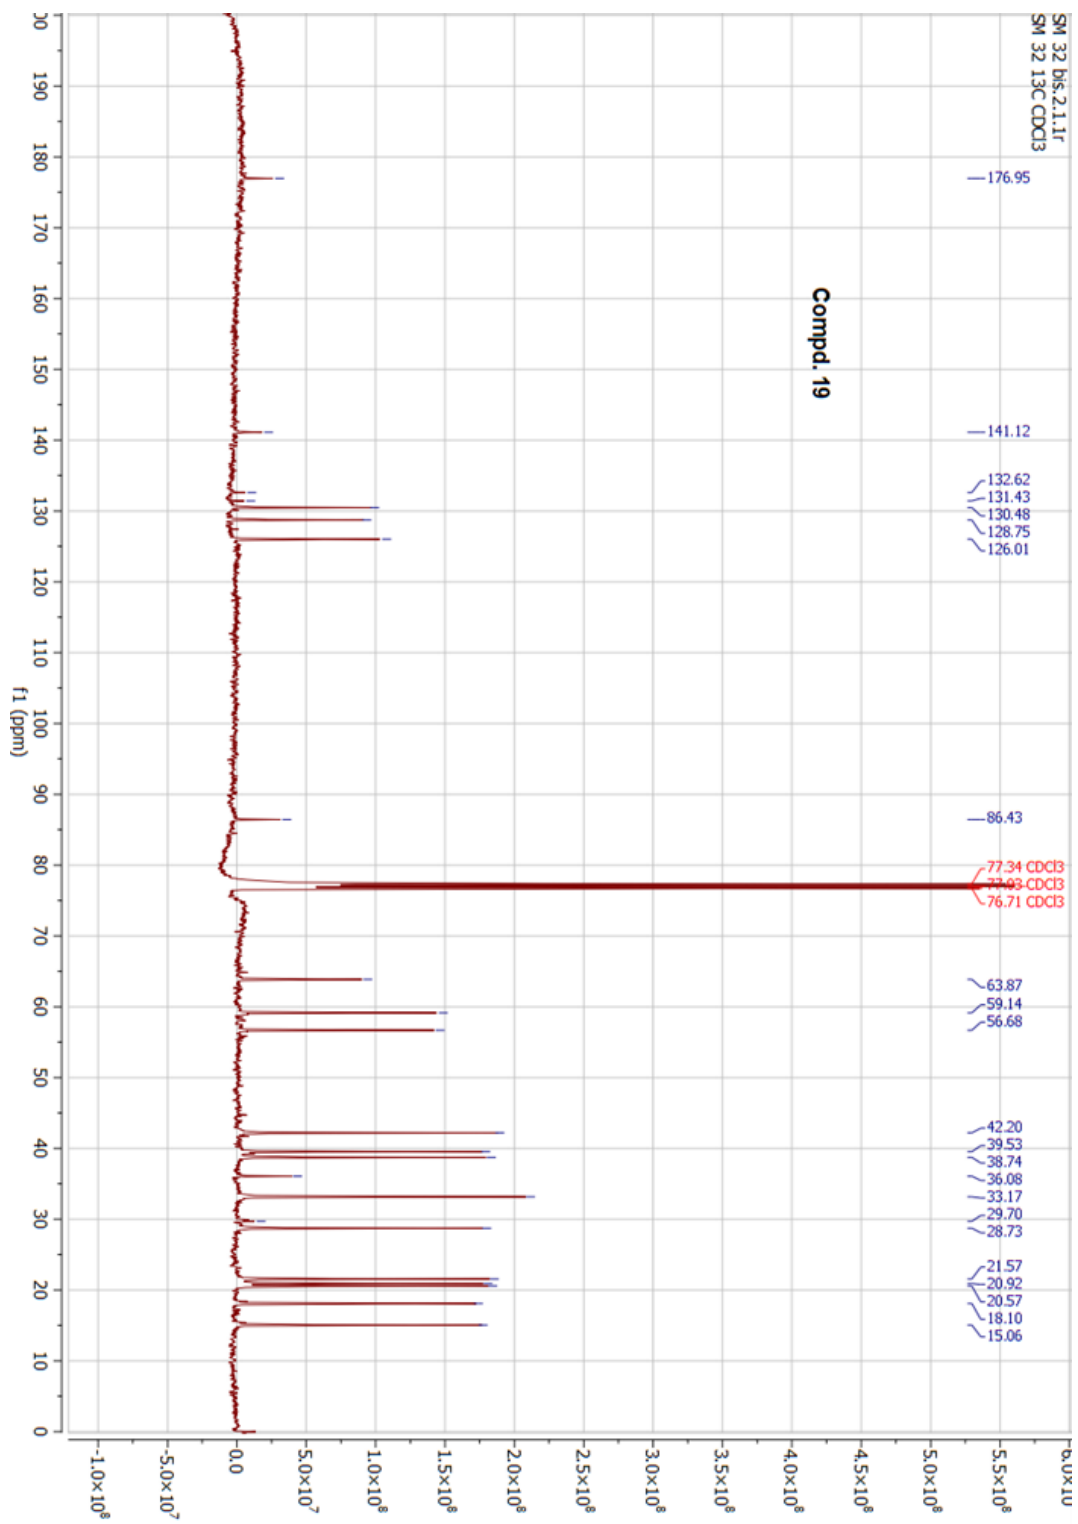

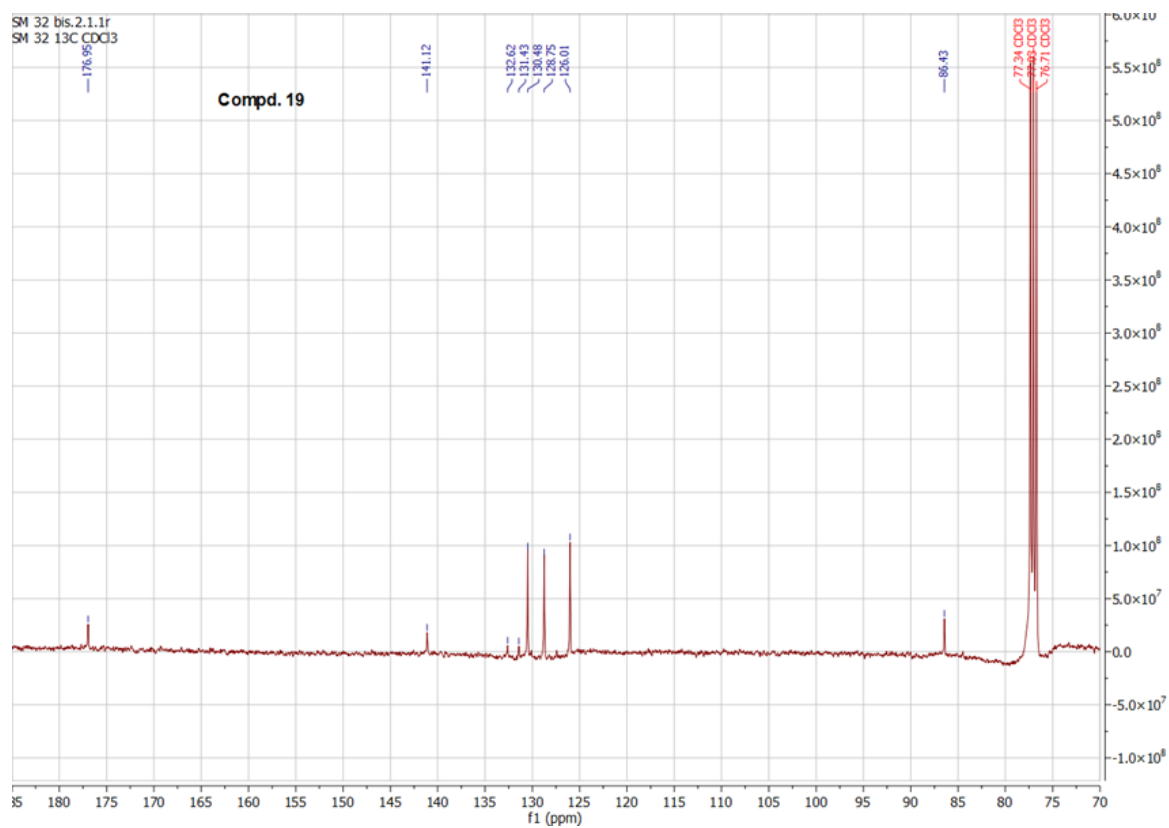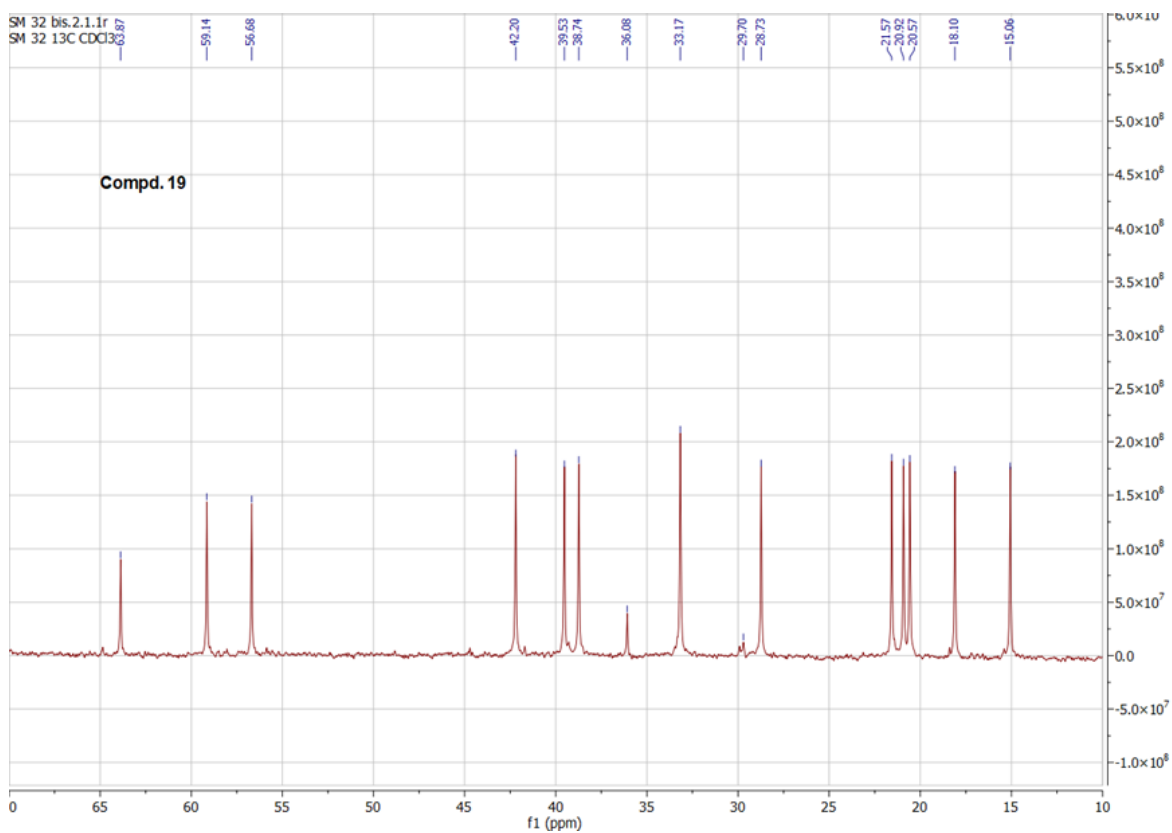

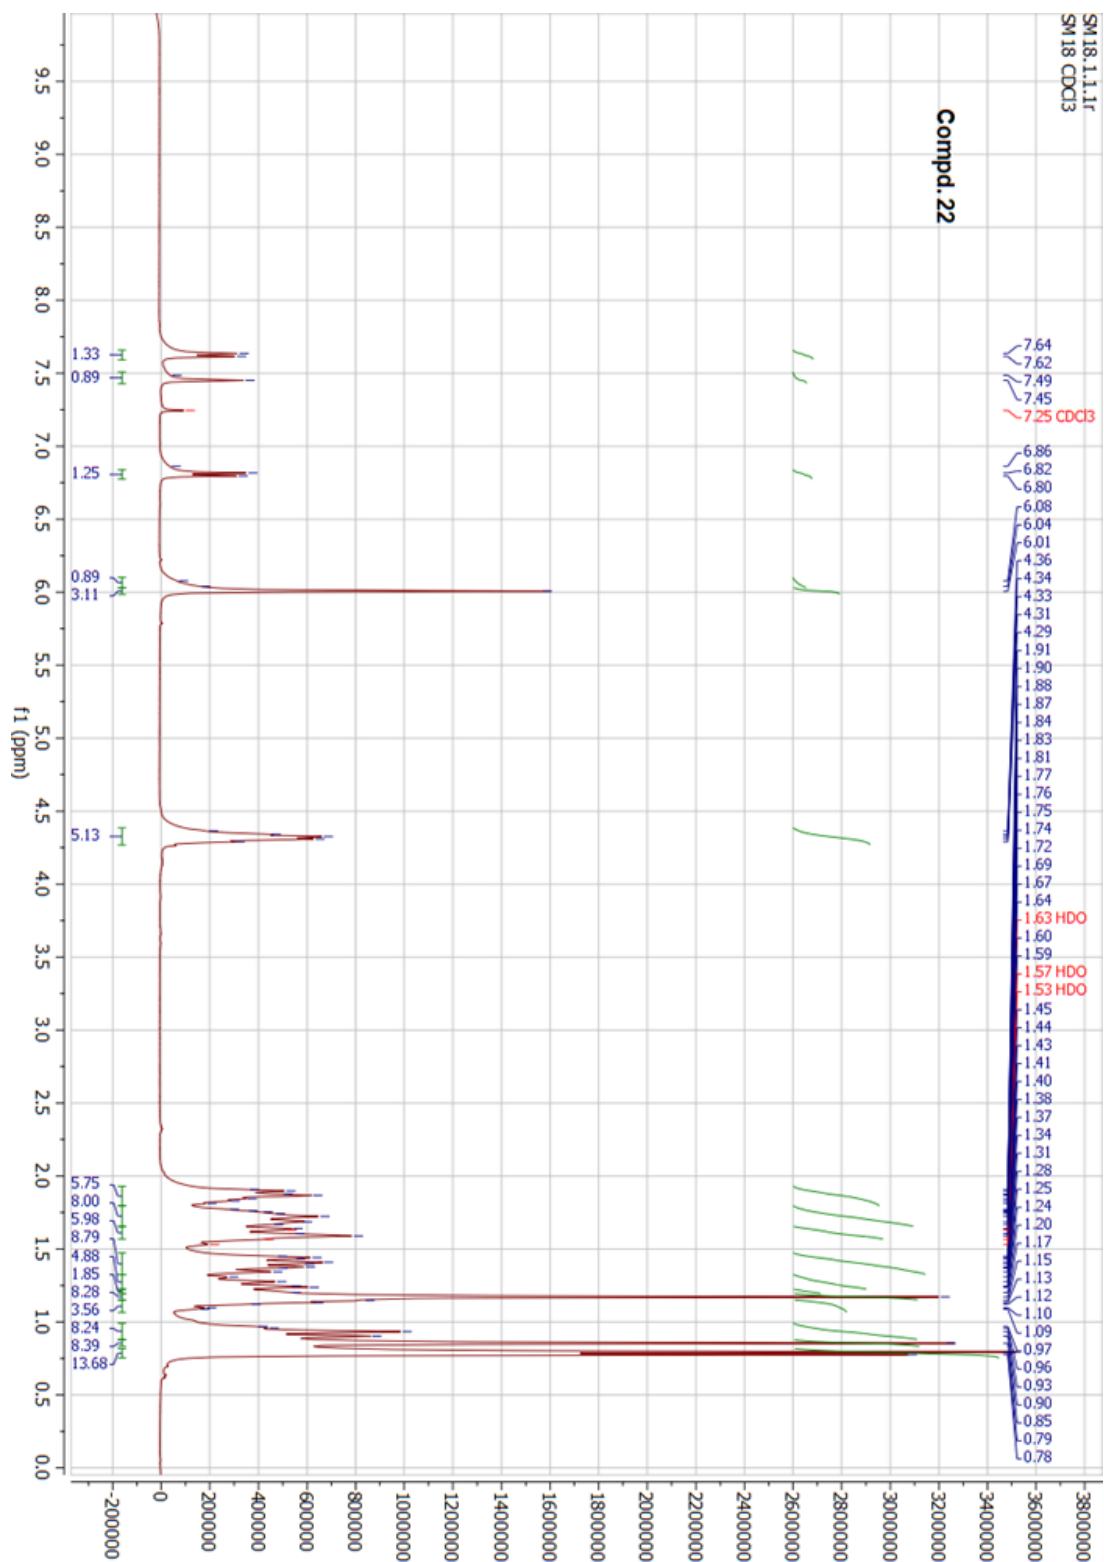

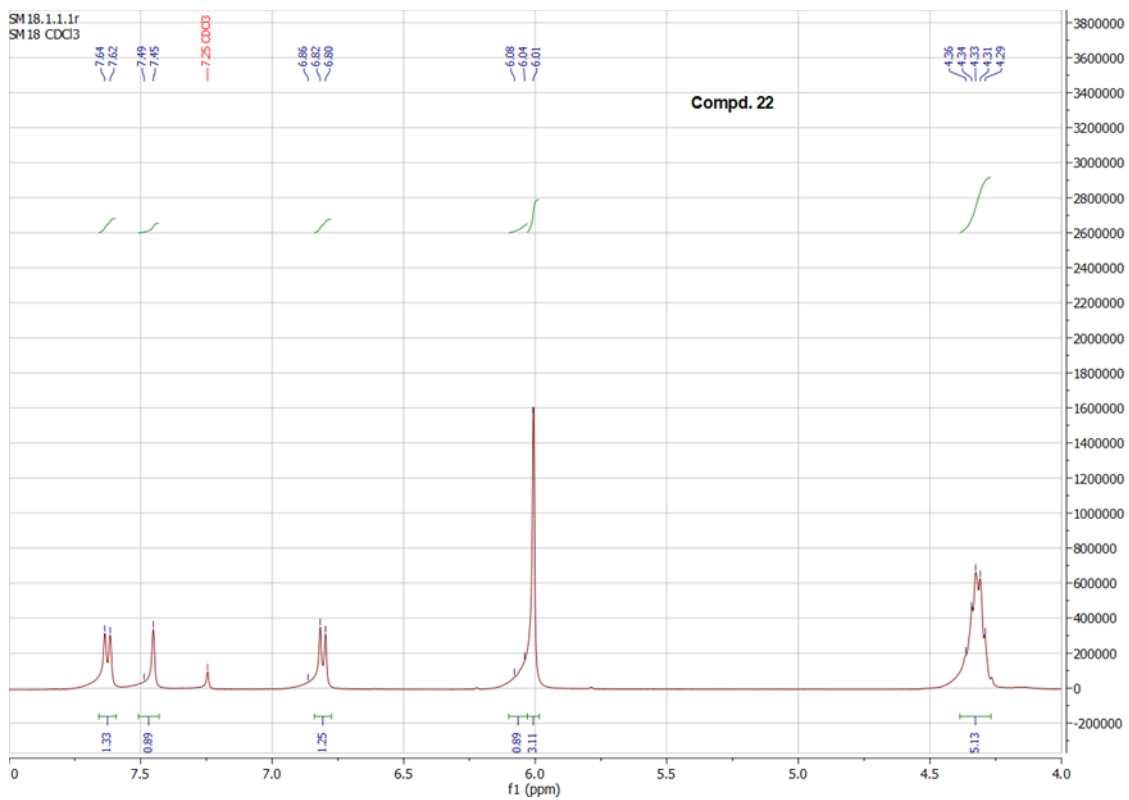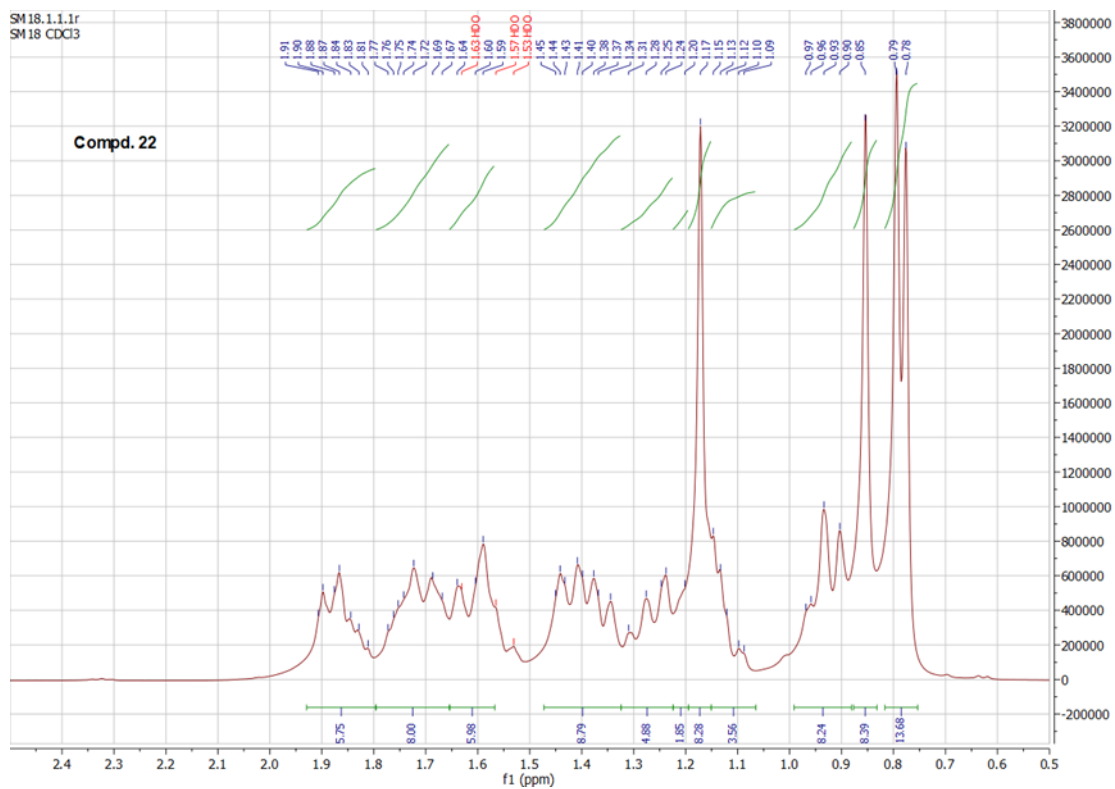

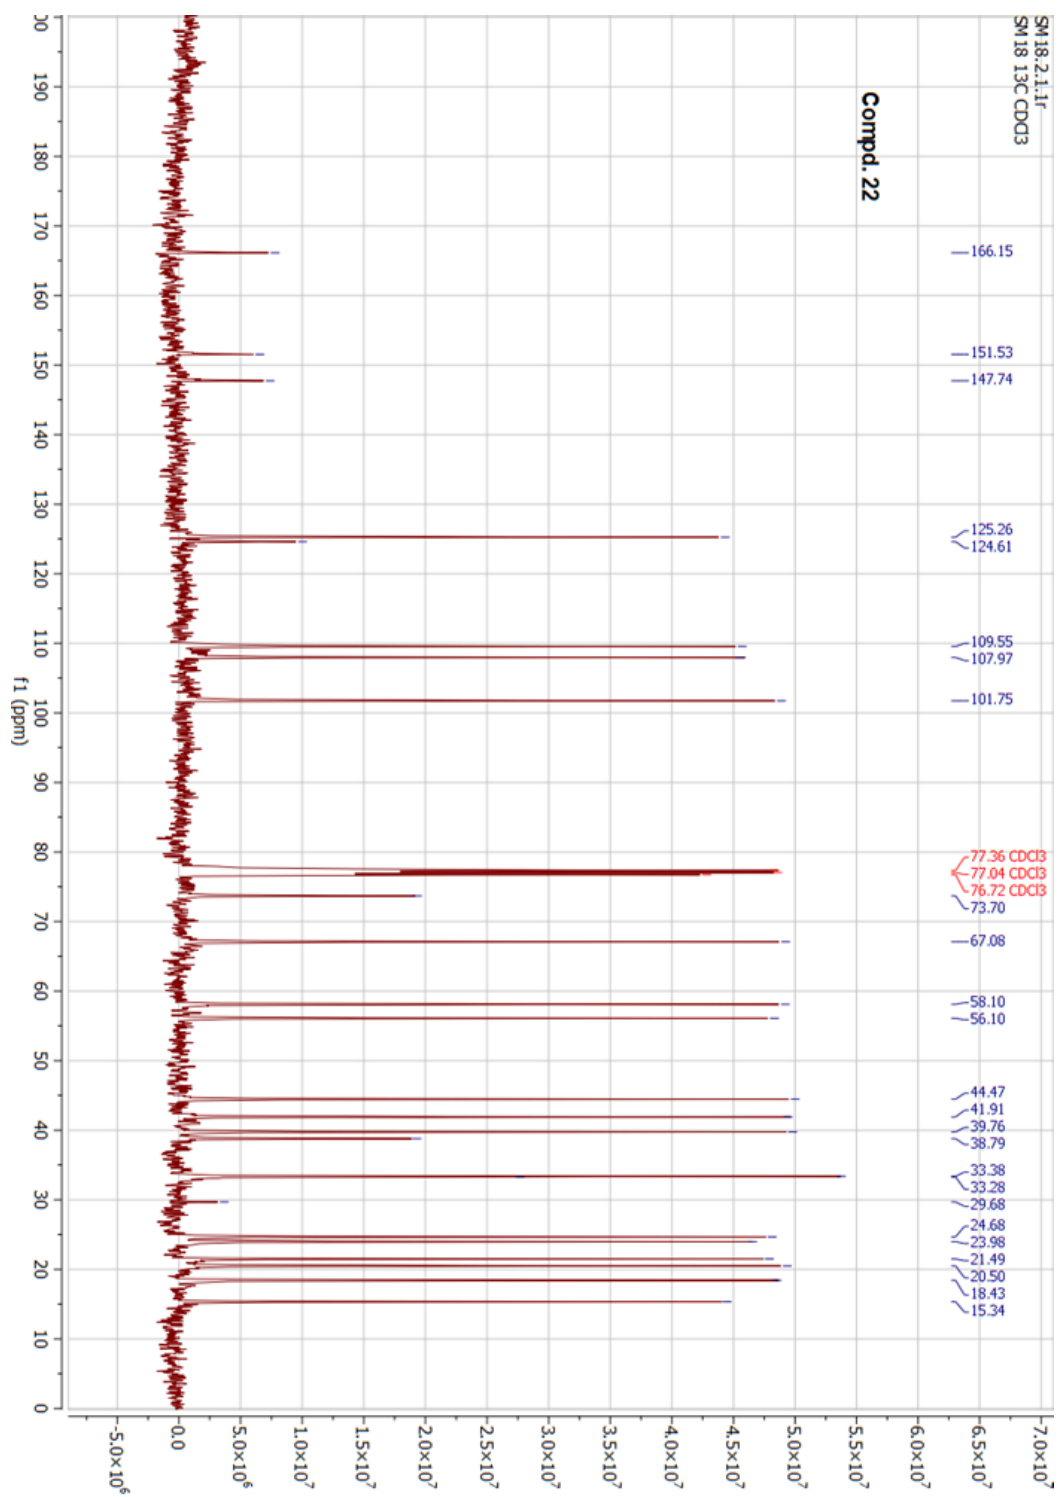

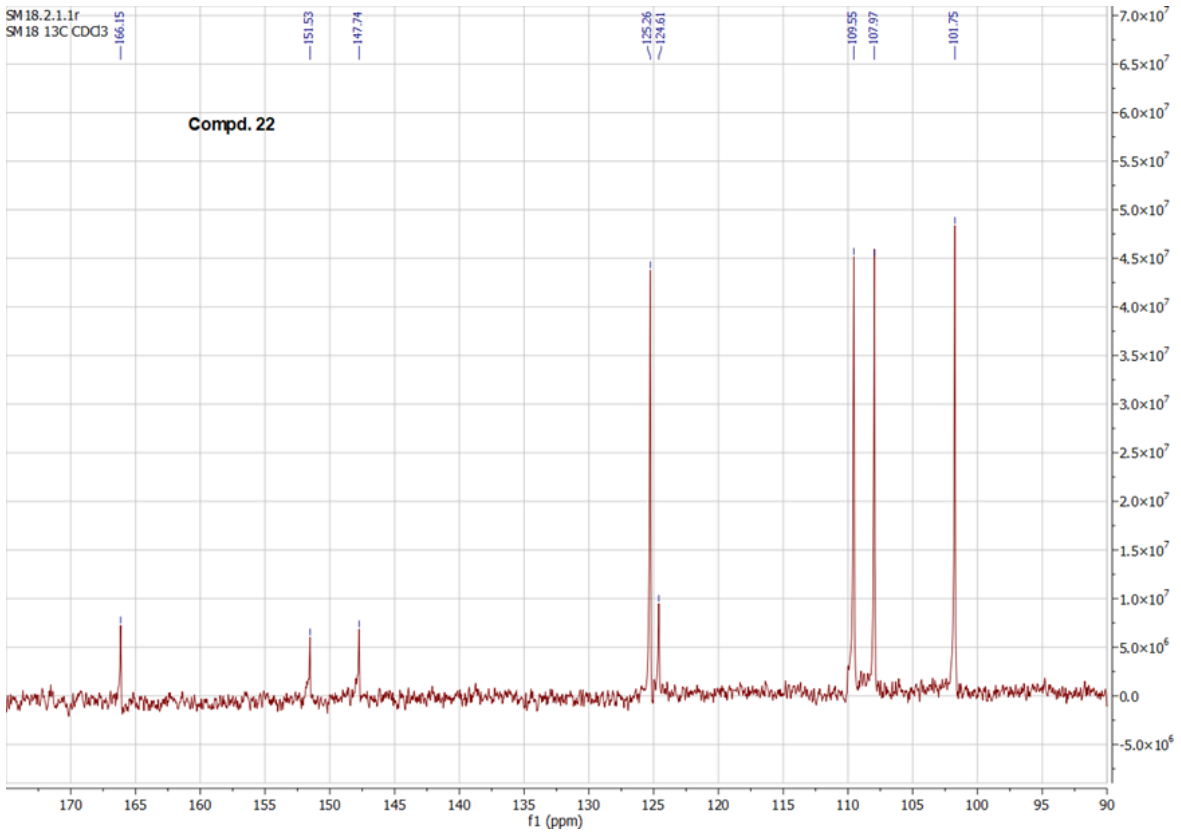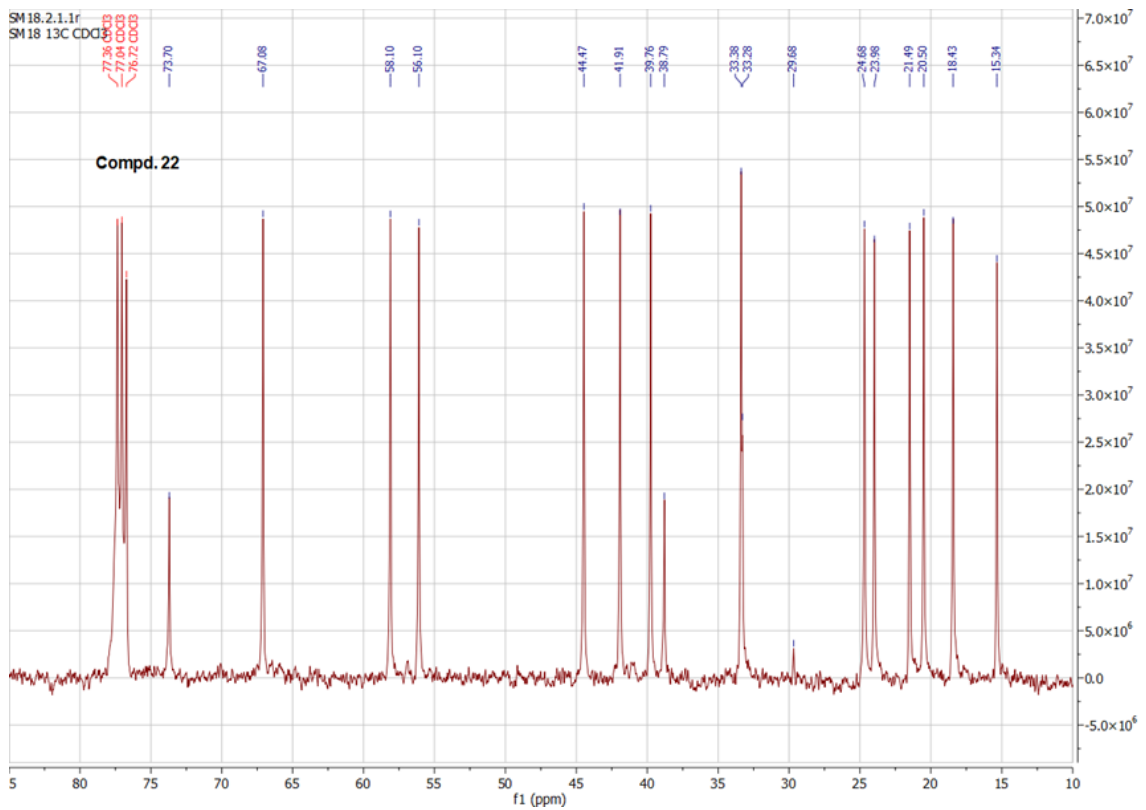



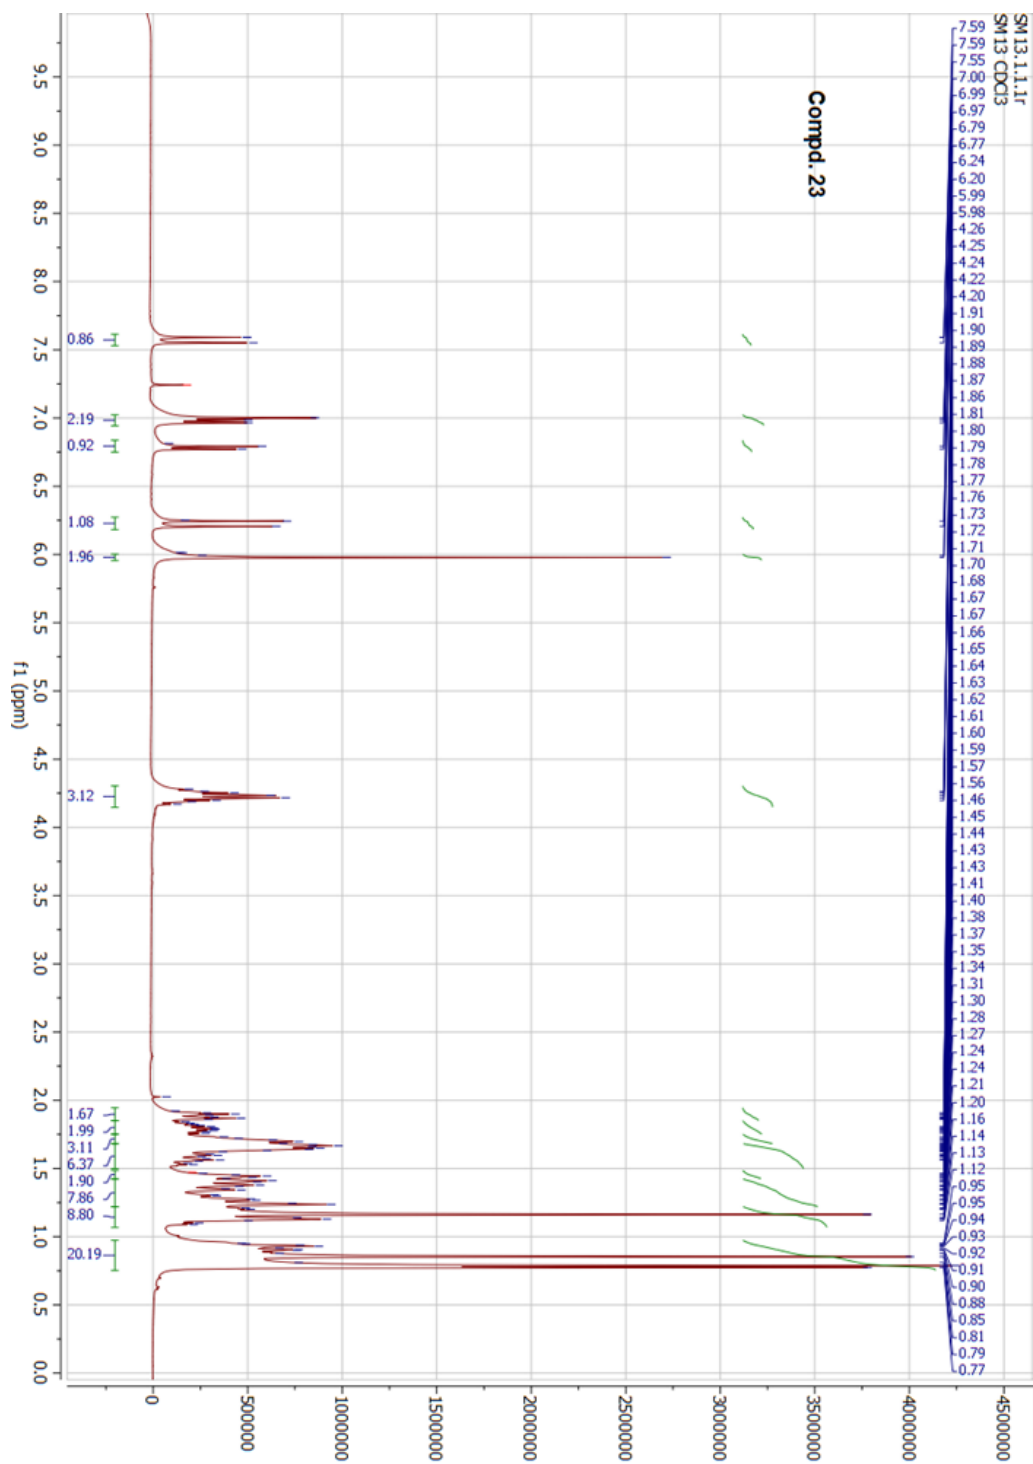

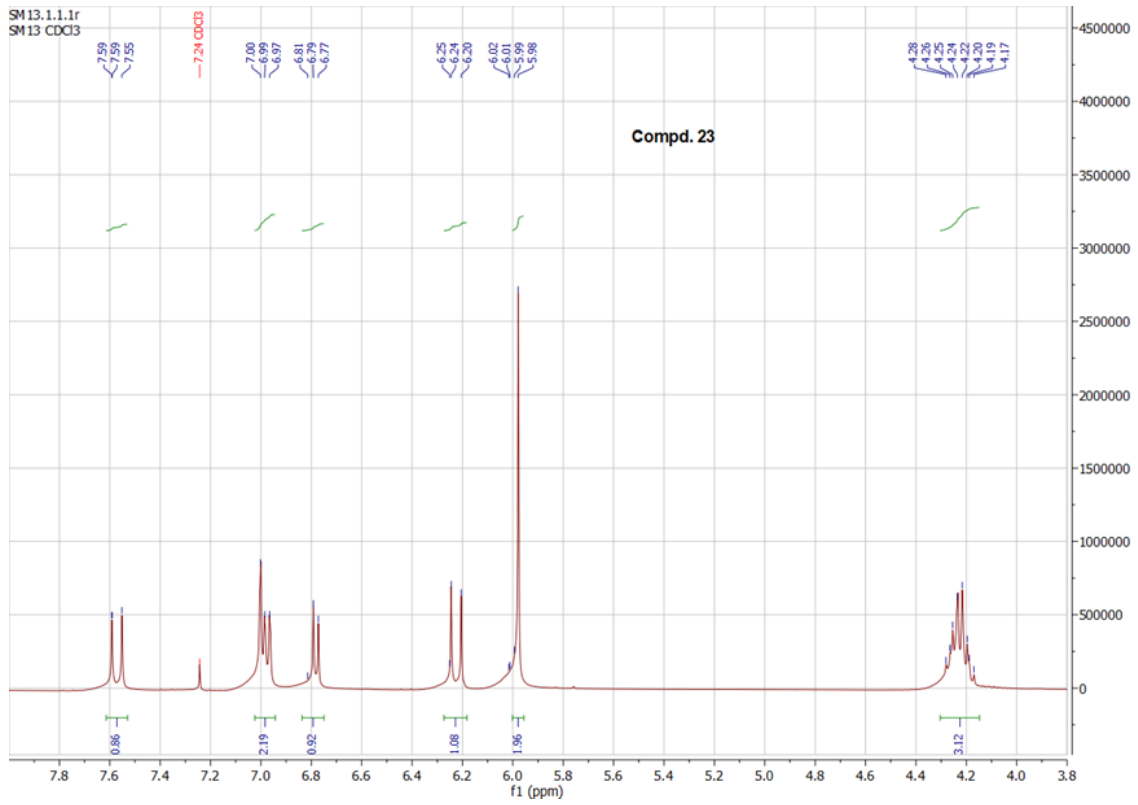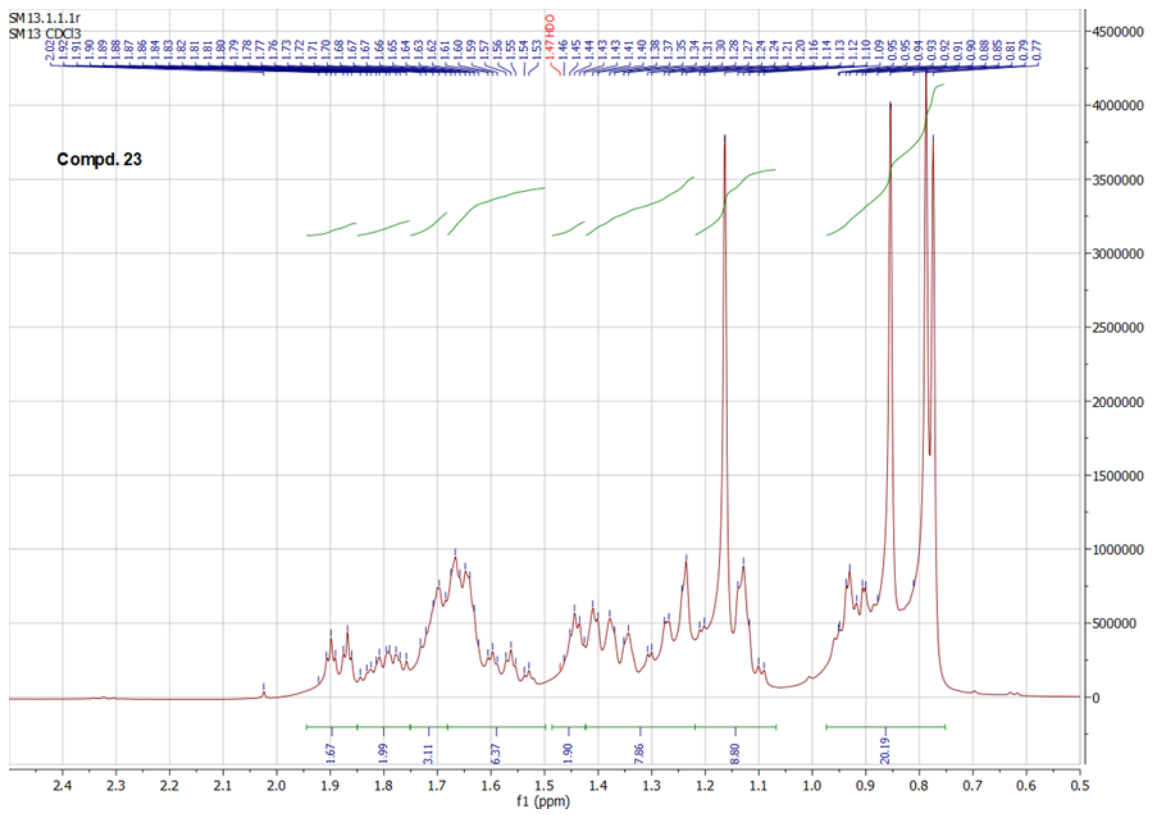

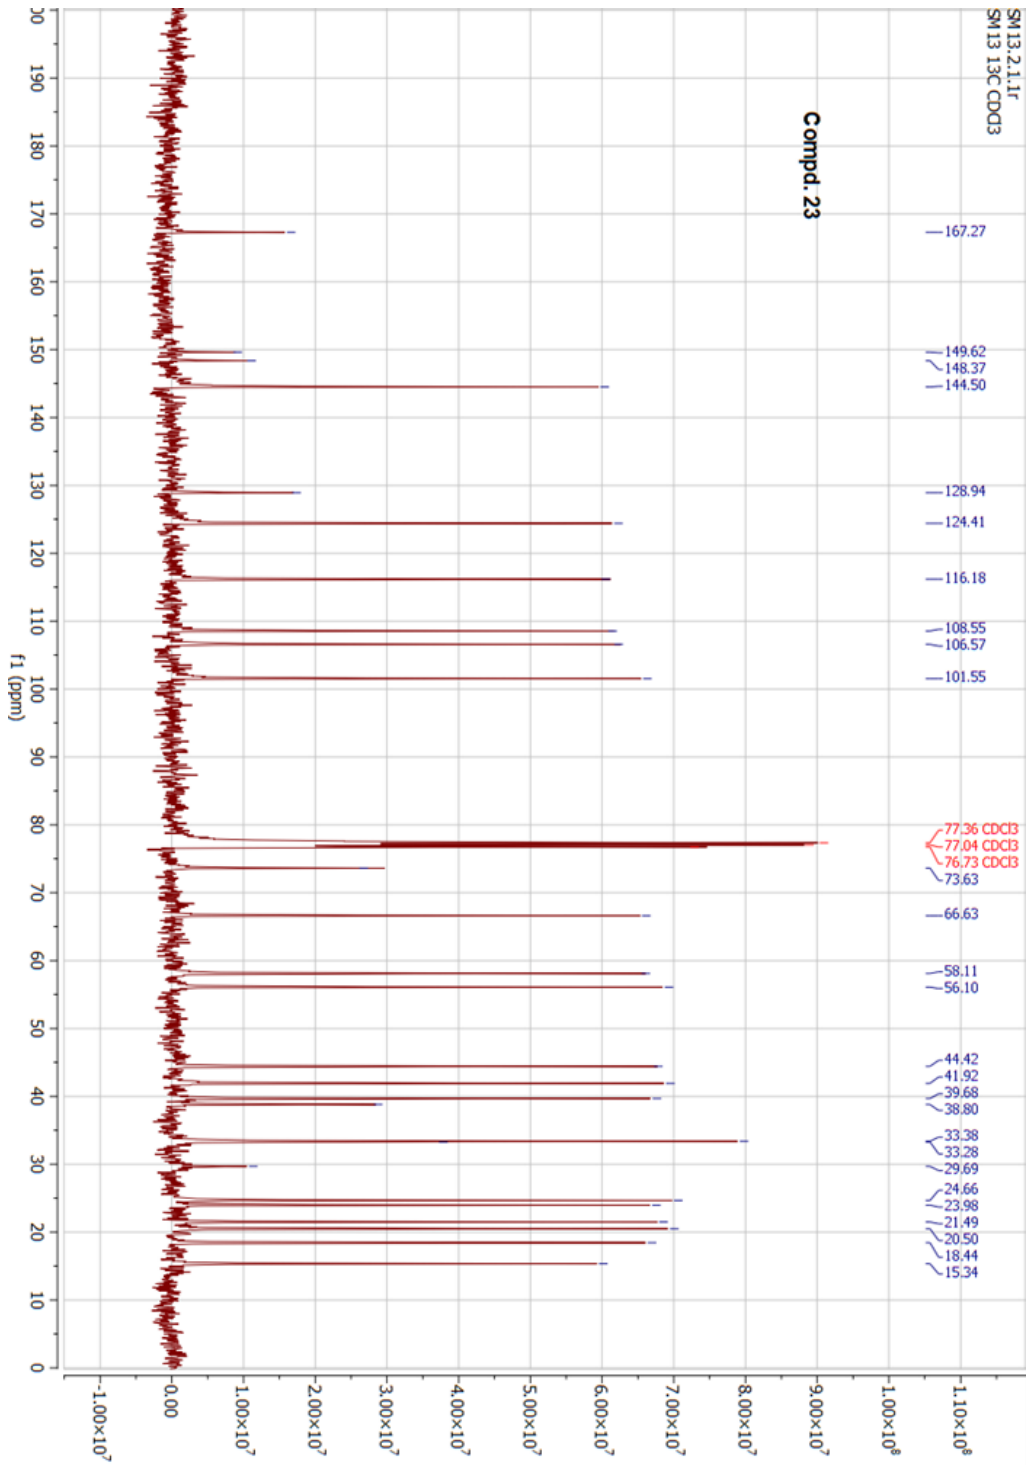

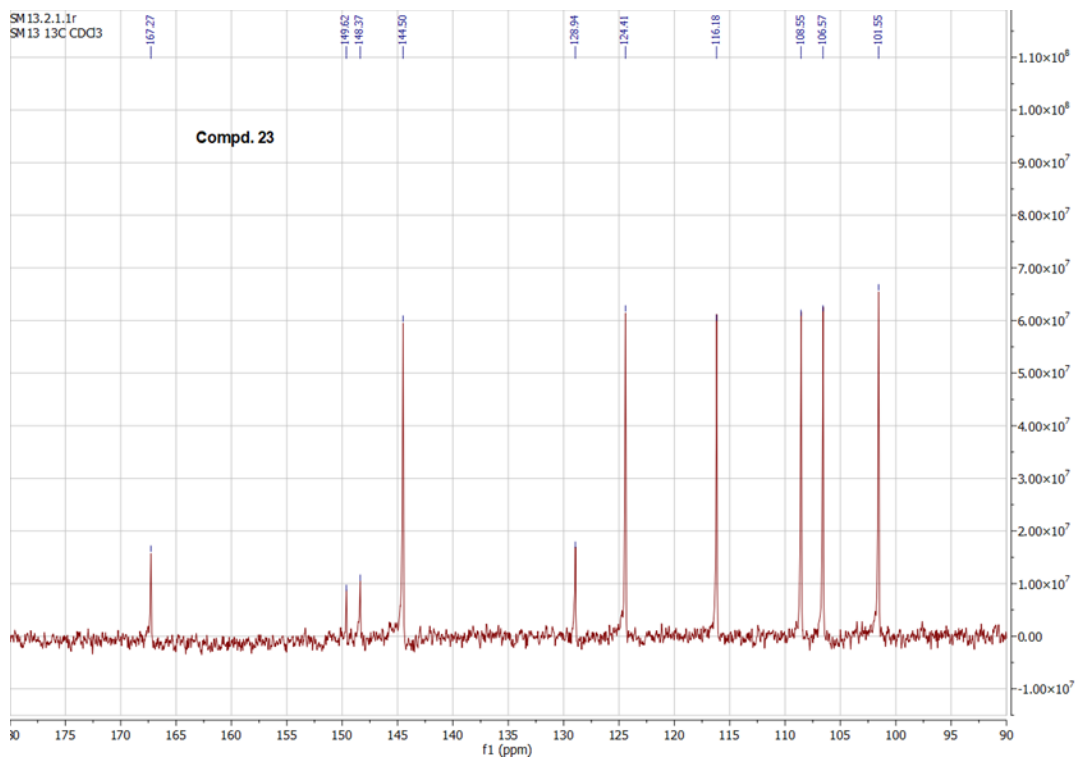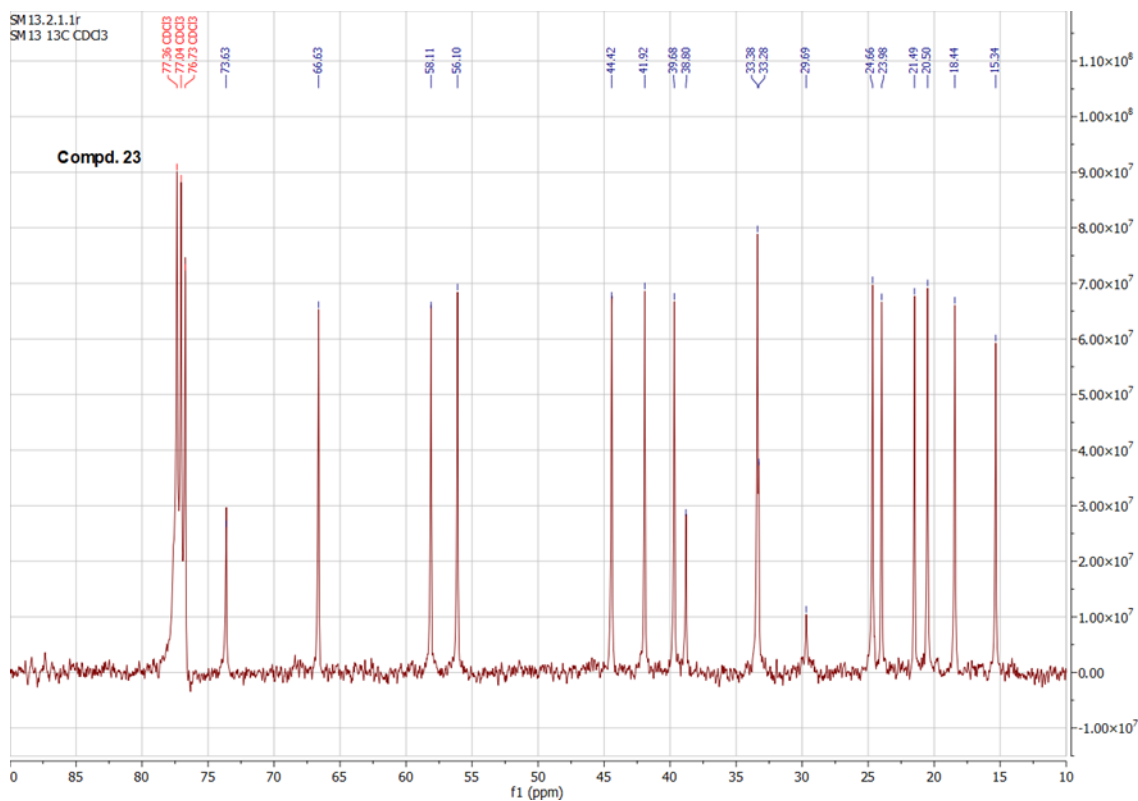

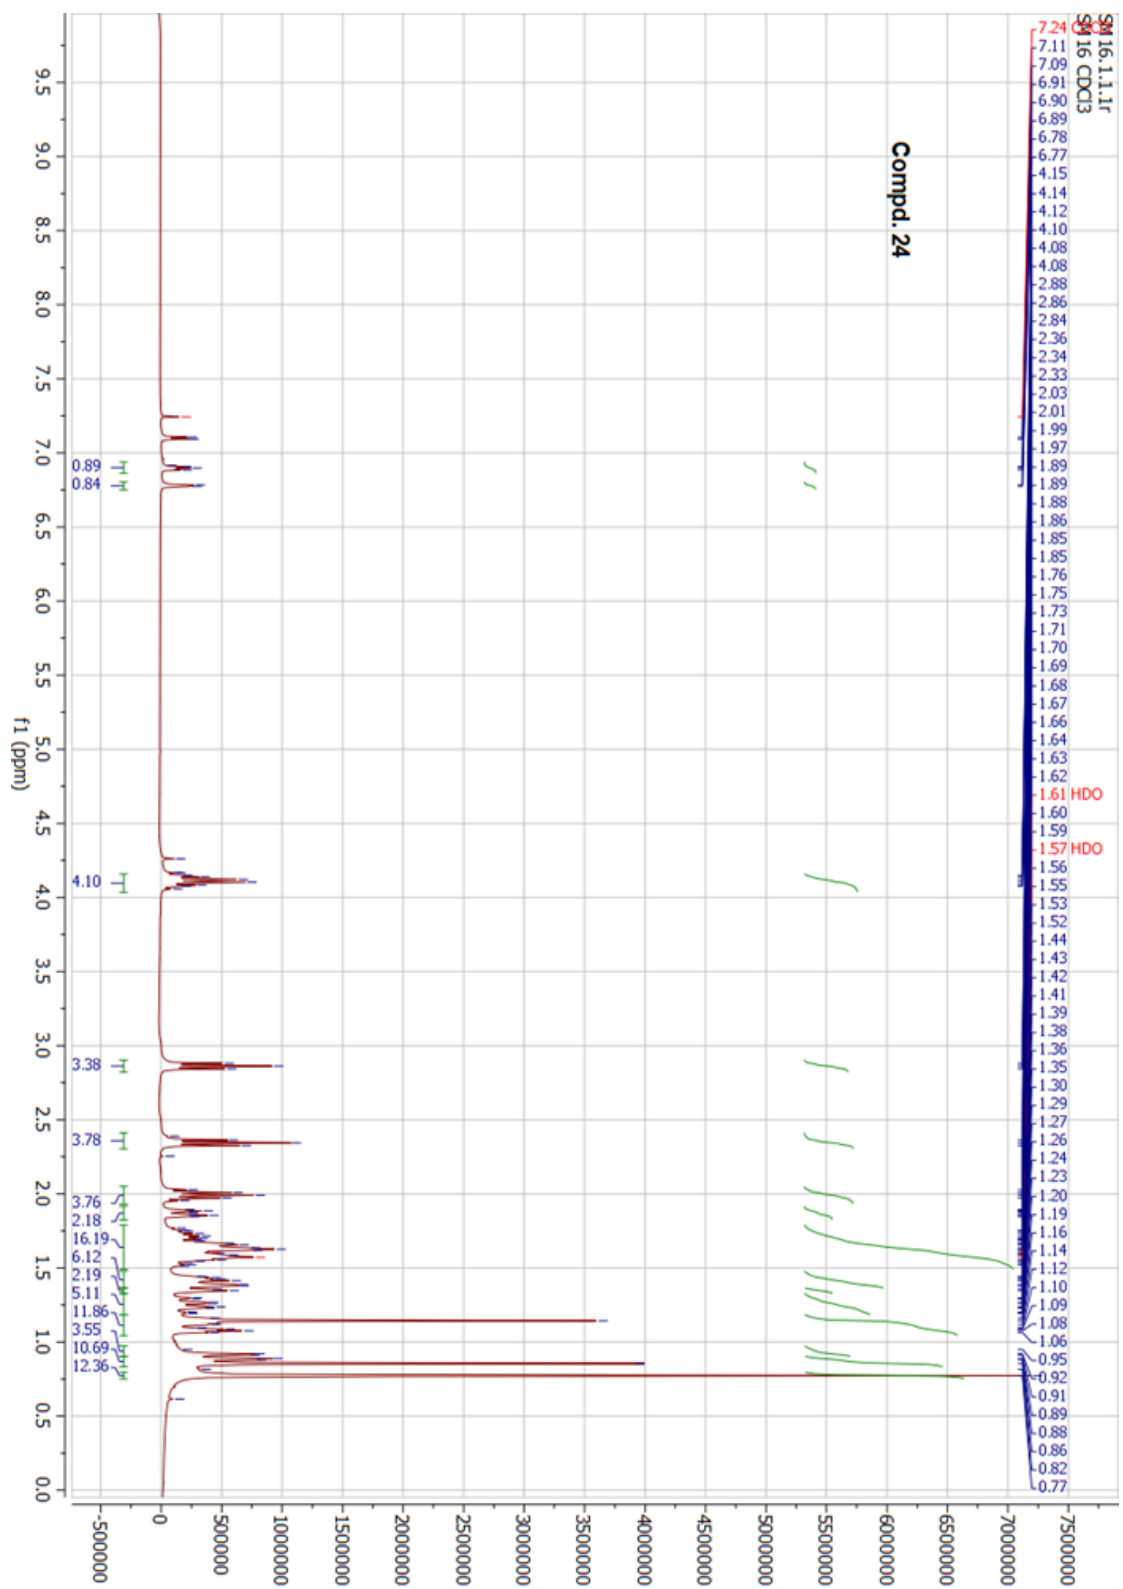

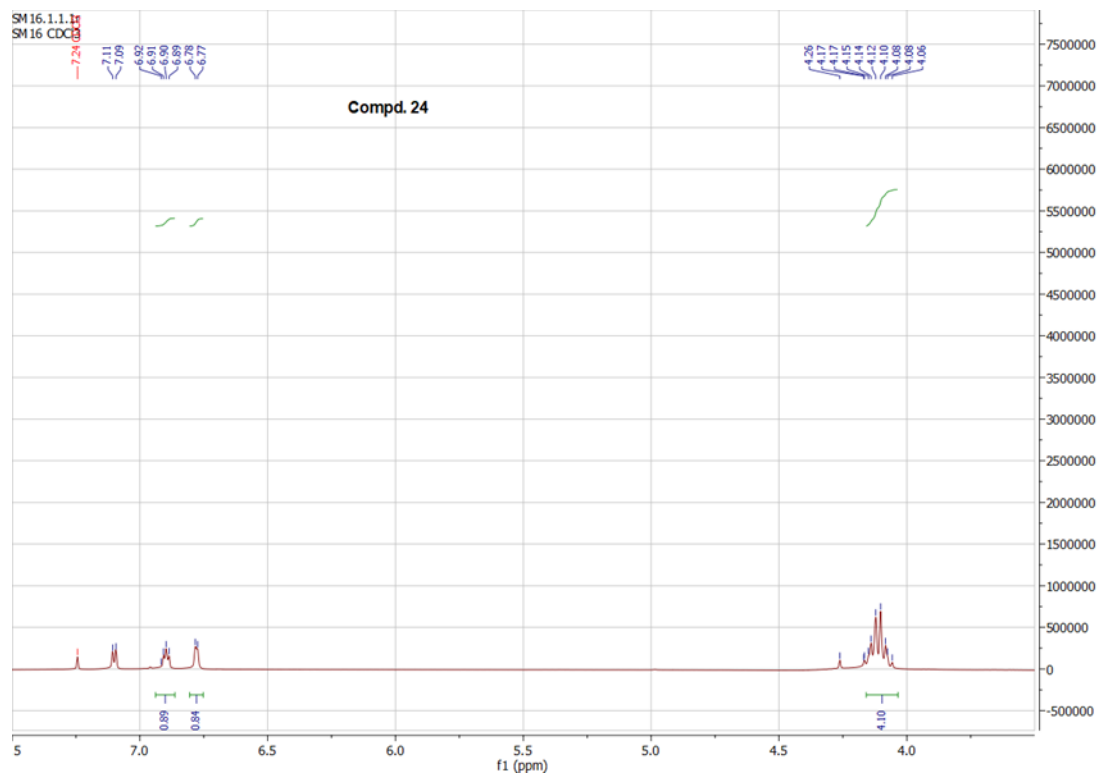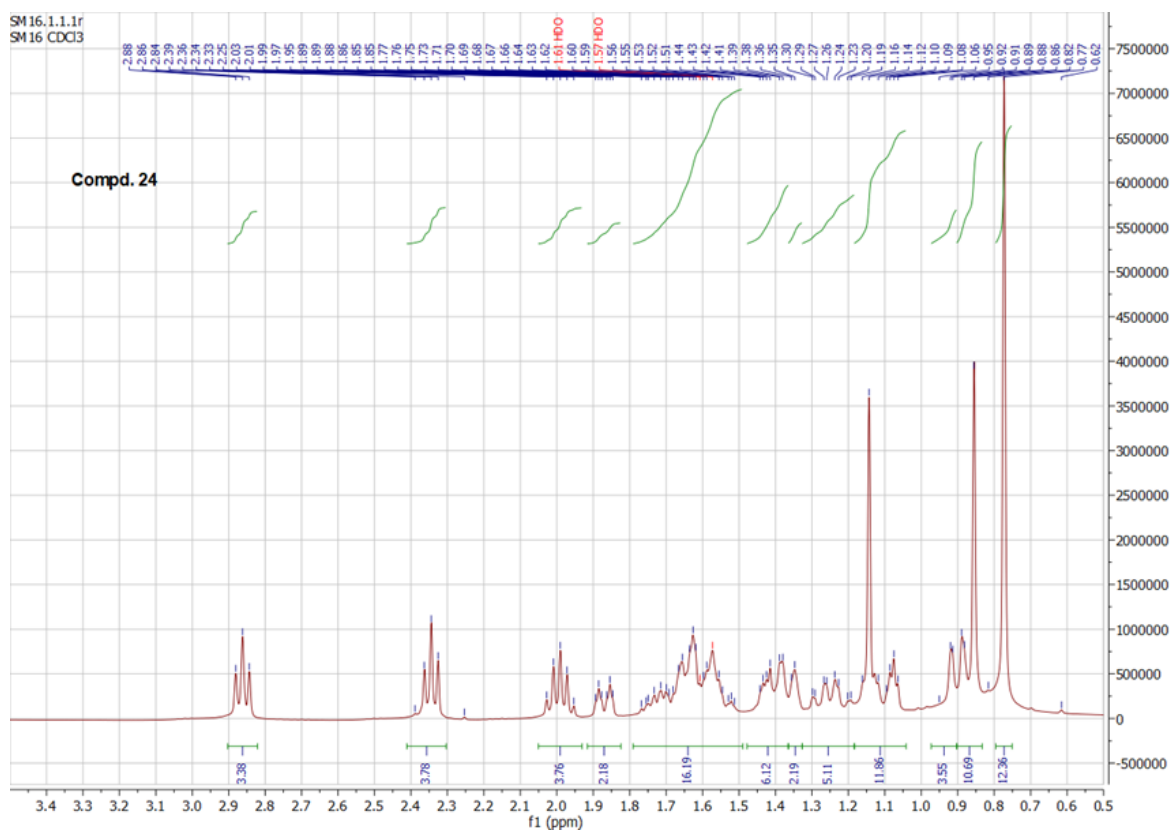

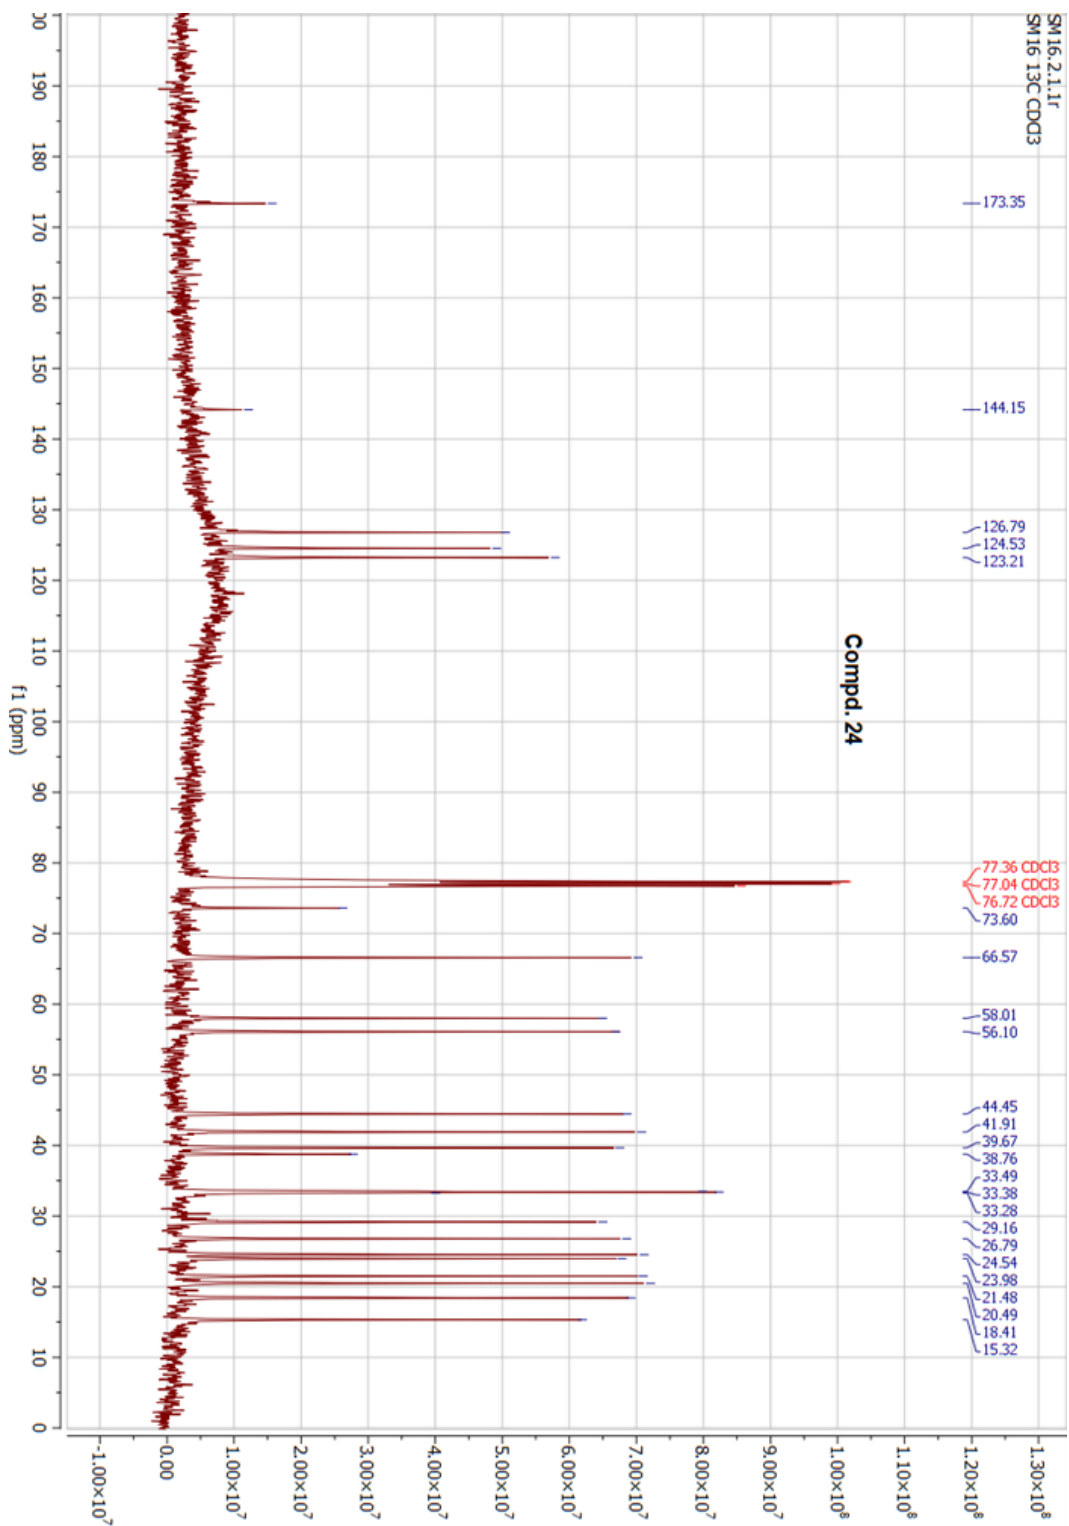

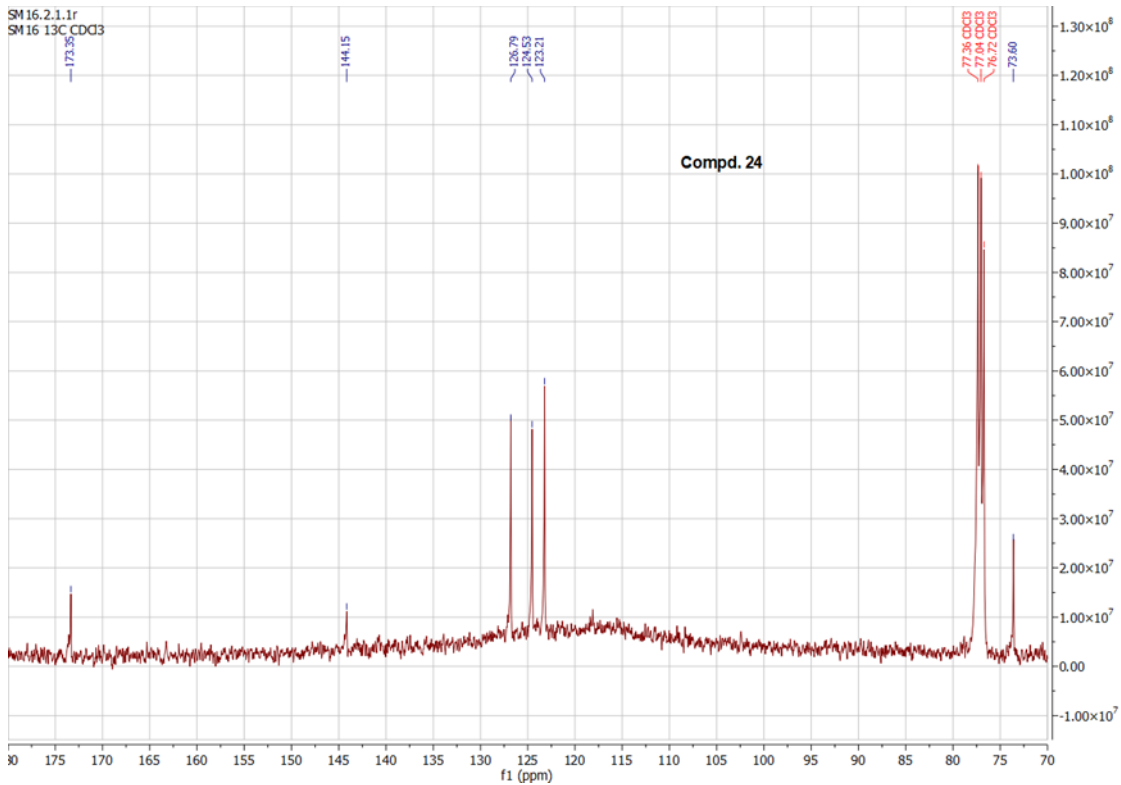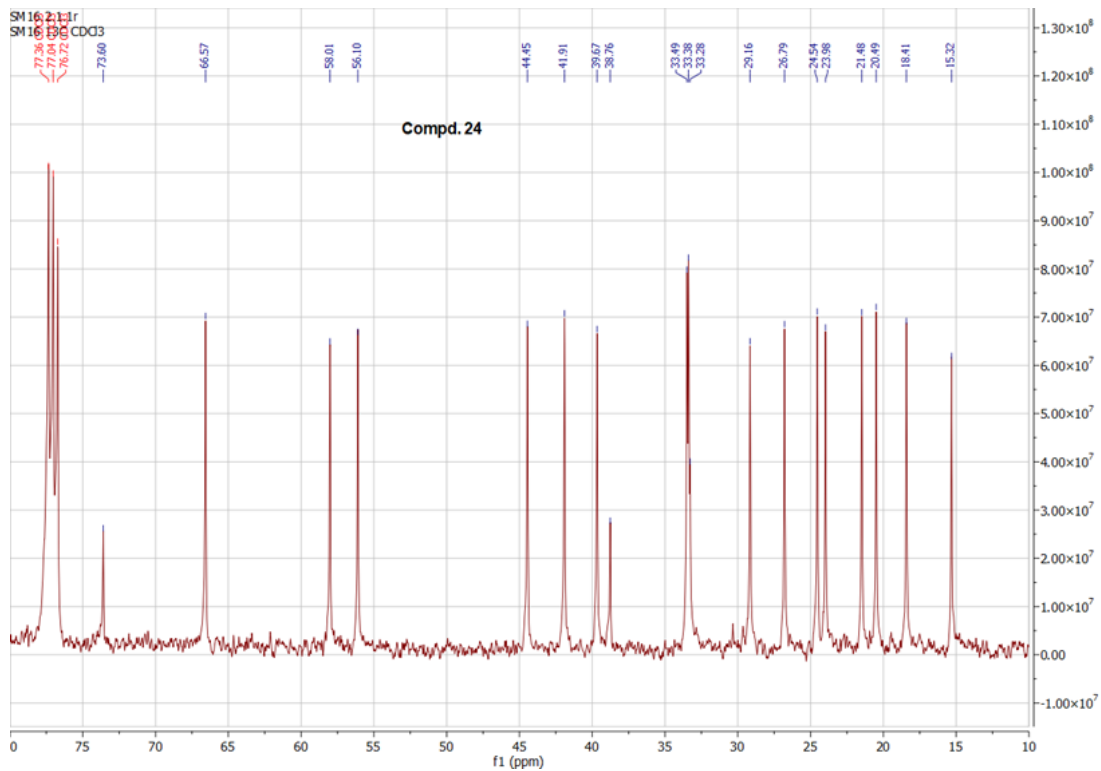



Current Data Parameters  
 EXPNO 2  
 PROCNO 1  
 F2 - Acquisition Parameters  
 Date\_ 20181214  
 Time 11:11:14  
 INSTRUM spect  
 PULPROG zgpg30  
 PRGNAME 5 mm 1H zq30p4/4  
 O1 432.52  
 O2 432.52  
 SOLVENT CDCl3  
 NS 24  
 DS 2  
 FIDRES 4194.630 Hz  
 AQ 0.044005 Hz  
 RG 7.8119411 sec  
 DE 119.700 usec  
 TE 4.00 usec  
 TD 350.0 K  
 D1 2.00000000 sec  
 \*\*\*\*\* CHANNEL f1 \*\*\*\*\*  
 NUC1 1H  
 P1 4.00 usec  
 PL1 0.00 dB  
 SFO1 300.131508 MHz  
 F2 - Processing parameters  
 SI 300.130026 MHz  
 SF 300.131508 MHz  
 NI 65536  
 SSB 0  
 GB 0  
 PC 0.50

Compd: 25

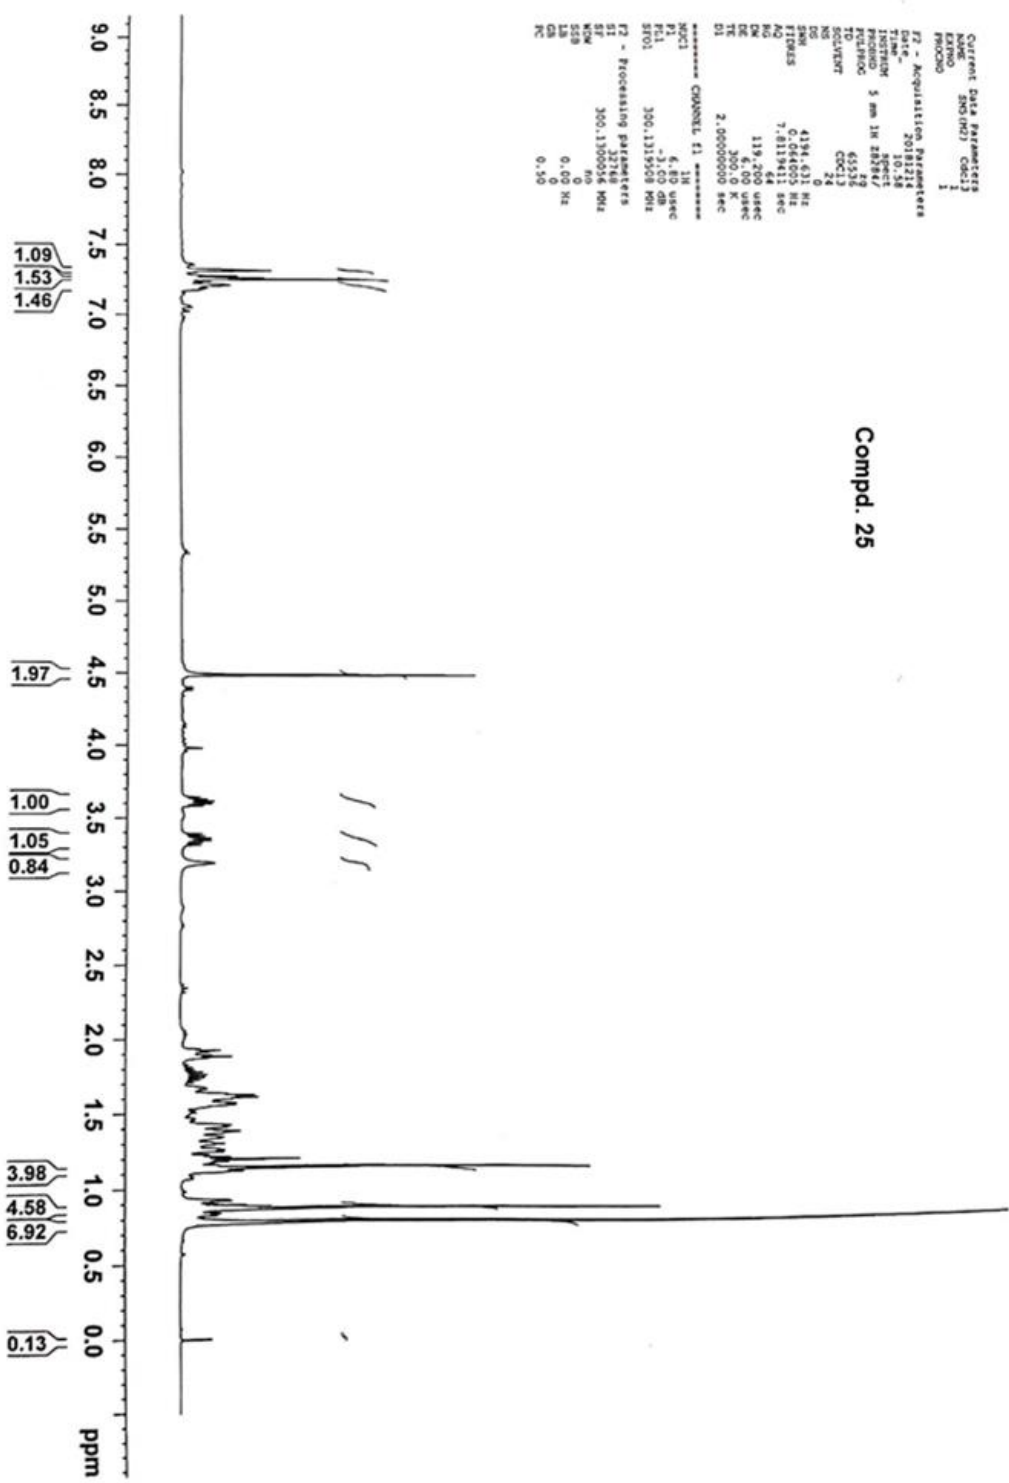

Current Data Parameters  
 NAME 13C SMS (M2) Cdc13  
 EXPNO 2  
 PROCNO 2

**Compd. 25**

131.96  
134.74  
129.78  
127.90  
127.75  
126.85  
126.42  
125.74

77.47  
77.05  
76.63  
72.58  
72.47  
72.32  
72.19

59.02  
56.02

43.97  
41.94  
39.45  
38.05  
33.16  
33.23  
25.18  
24.79  
21.46  
20.39  
18.37  
15.76

F2 - Acquisition Parameters  
 Date\_ 20181214  
 Time 13.06  
 INSTRUM spect  
 PROBHD 5 mm 1H 28284/  
 PULPROG zgpg  
 TD 65536  
 SOLVENT CDCl3  
 NS 300  
 DS 8  
 SMH 17995.611 Hz  
 FIDRES 0.274439 Hz  
 AQ 1.8219508 sec  
 RG 11585.2  
 DW 27.800 usec  
 DE 6.00 usec  
 TE 300.0 K  
 D1 2.50000000 sec  
 d11 0.03000000 sec  
 d12 0.00002000 sec

\*\*\*\*\* CHANNEL f1 \*\*\*\*\*  
 NUCl 13C  
 ZF1 7.75 usec  
 F1 75.4752953 MHz  
 SFO1 75.4752953 MHz

\*\*\*\*\* CHANNEL f2 \*\*\*\*\*  
 CPDPRG2 waltz16  
 NUCl 1H  
 PCPD2 80.00 usec  
 PL2 -3.00 dB  
 PL12 17.50 dB  
 PL13 17.50 dB  
 SFO2 300.1312005 MHz

F2 - Processing parameters  
 SI 32768  
 SF 75.467520 MHz  
 MDW no  
 SSB no  
 LB 0  
 GB 0  
 PC 1.40

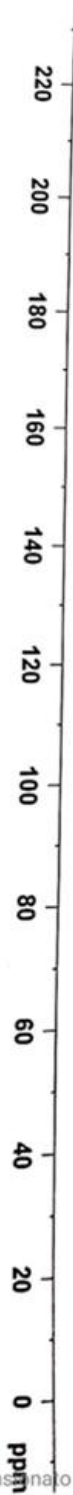

Supplement: marinedrugs-18-00519-s001.pdf [file marinedrugs-18-00519-s001.pdf]
